# Supplementary material for: Synthesis of 2,3-bis-organochalcogenyl-benzo[b]chalcogenophenes promoted by Oxone®
Source: Royal Society of Chemistry journal article supplement (doi:10.1039/c9nj00526a), 2019-01-01
Supplement: c9nj00526a1.pdf [file c9nj00526a1.pdf]

## Support Information

### Synthesis of 2,3-bis-organochalcogenyl-benzo[*b*]chalcogenophenes promoted by Oxone<sup>®</sup>

Gelson Perin,<sup>\*a</sup> Liane K. Soares,<sup>a</sup> Paola S. Hellwig,<sup>a</sup> Marcio S. Silva,<sup>a</sup> José S. S. Neto,<sup>a</sup> Juliano A. Roehrs,<sup>b</sup> Thiago Barcellos<sup>c</sup> and Eder J. Lenardão<sup>\*a</sup>

<sup>a</sup>LASOL-CCQFA, Universidade Federal de Pelotas – UFPel; P.O. Box 354 - 96010-900, Pelotas, RS, Brazil. <http://wp.ufpel.edu.br/lasol>.

<sup>b</sup>Instituto Federal Sul-Rio-Grandense, Campus Pelotas - Praça Vinte de Setembro 96015-360, RS, Brazil.

<sup>c</sup>Laboratory of Biotechnology of Natural and Synthetic Products – Universidade de Caxias do Sul – UCS, Caxias do Sul, 95070-560, RS, Brazil.

Corresponding authors: [gelson\\_perin@ufpel.edu.br](mailto:gelson_perin@ufpel.edu.br) (G. Perin) and [lenardao@ufpel.edu.br](mailto:lenardao@ufpel.edu.br) (E. J. Lenardão)

### Selected spectra

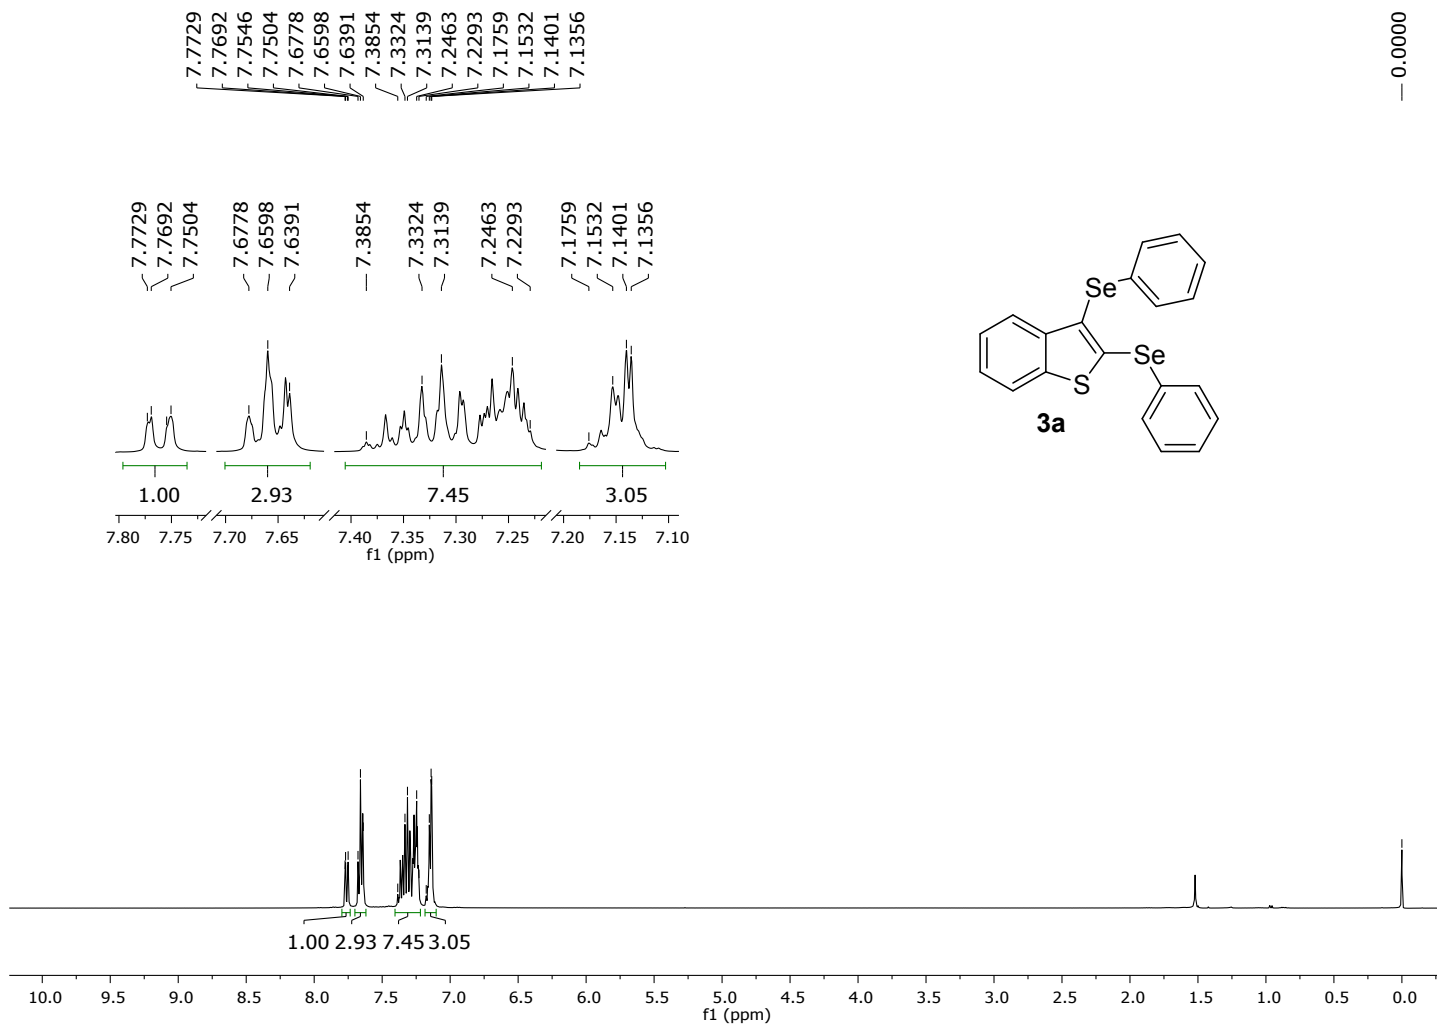

**Figure S1:**  $^1\text{H}$  NMR (400 MHz,  $\text{CDCl}_3$ ) spectrum 2,3-bis(phenylselanyl)benzo[*b*]thiophene **3a**.

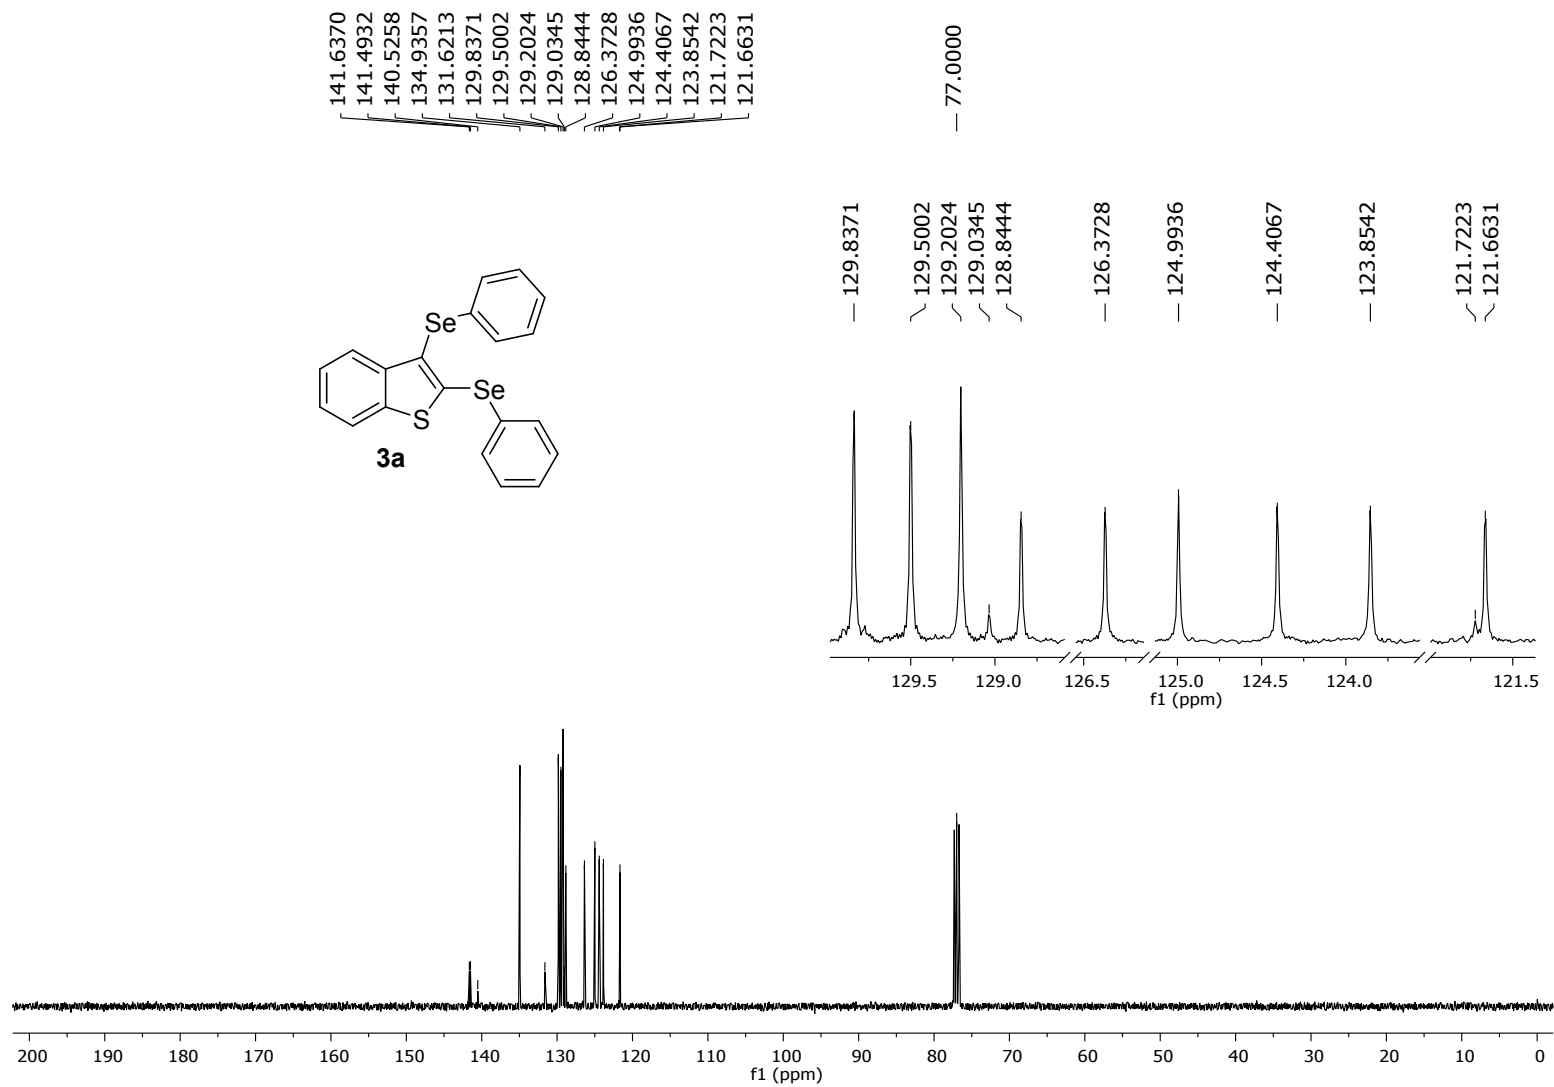

**Figure S2:** <sup>13</sup>C NMR (100 MHz, CDCl<sub>3</sub>) spectrum 2,3-bis(phenylselanyl)benzo[*b*]thiophene **3a**.

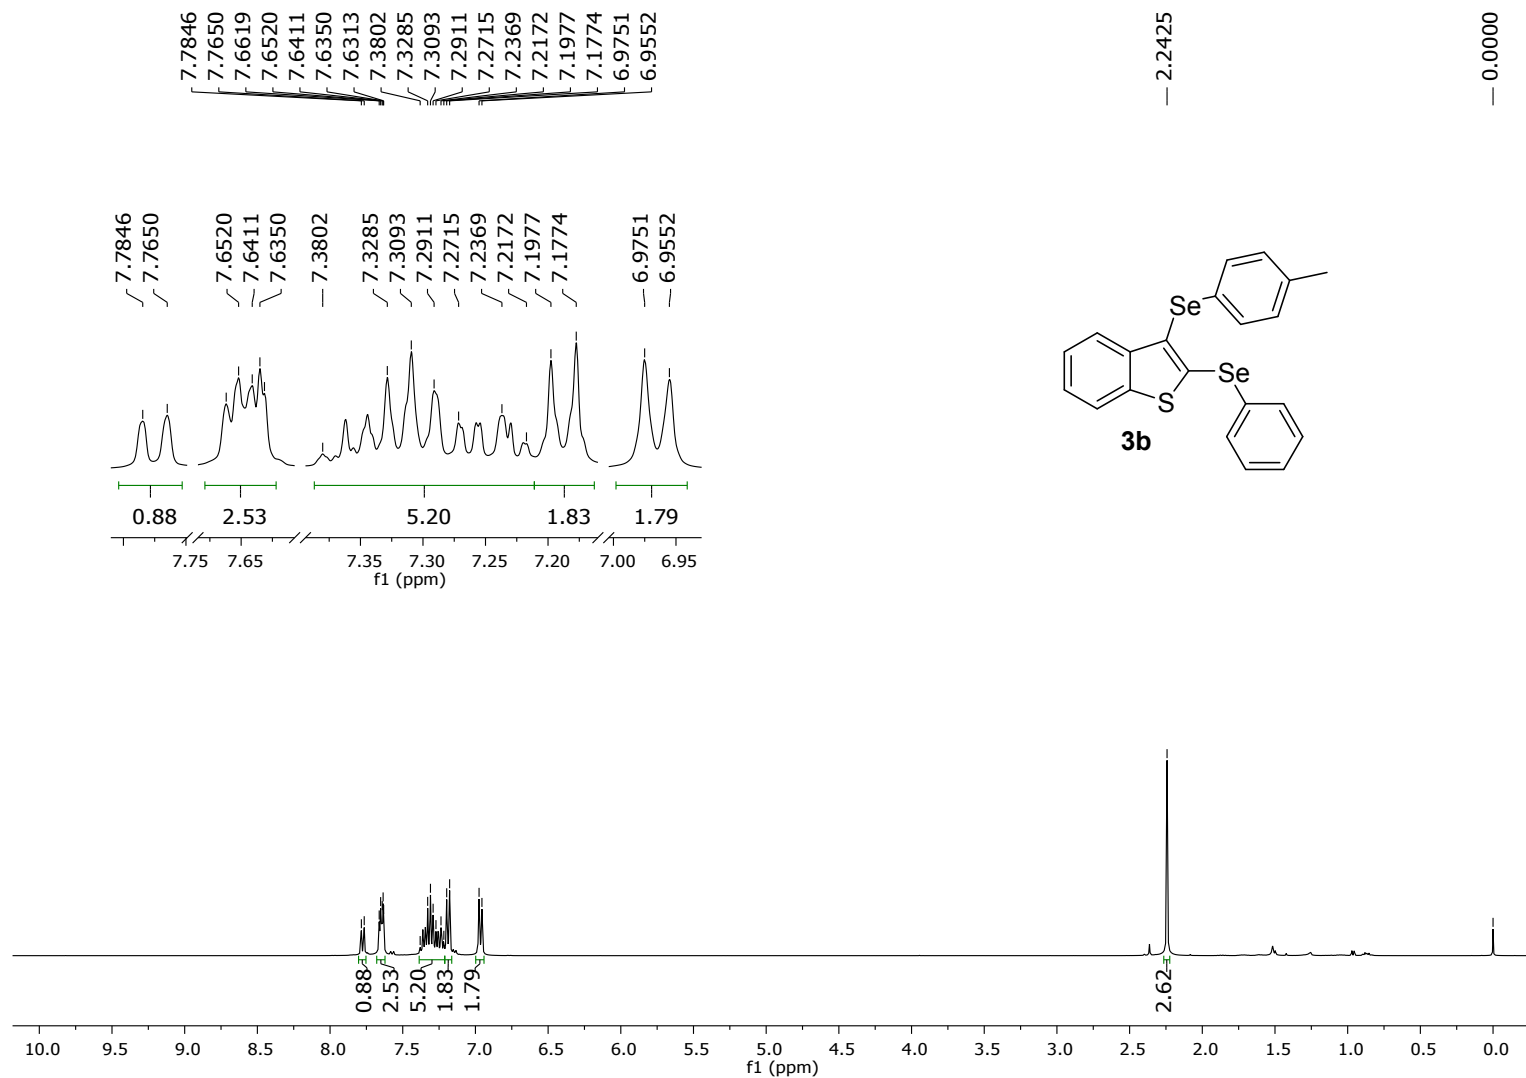

**Figure S3:**  $^1\text{H}$  NMR (400 MHz,  $\text{CDCl}_3$ ) spectrum 2-(phenylselanyl)-3-(4-tolylselanyl)benzo[*b*]thiophene **3b**.

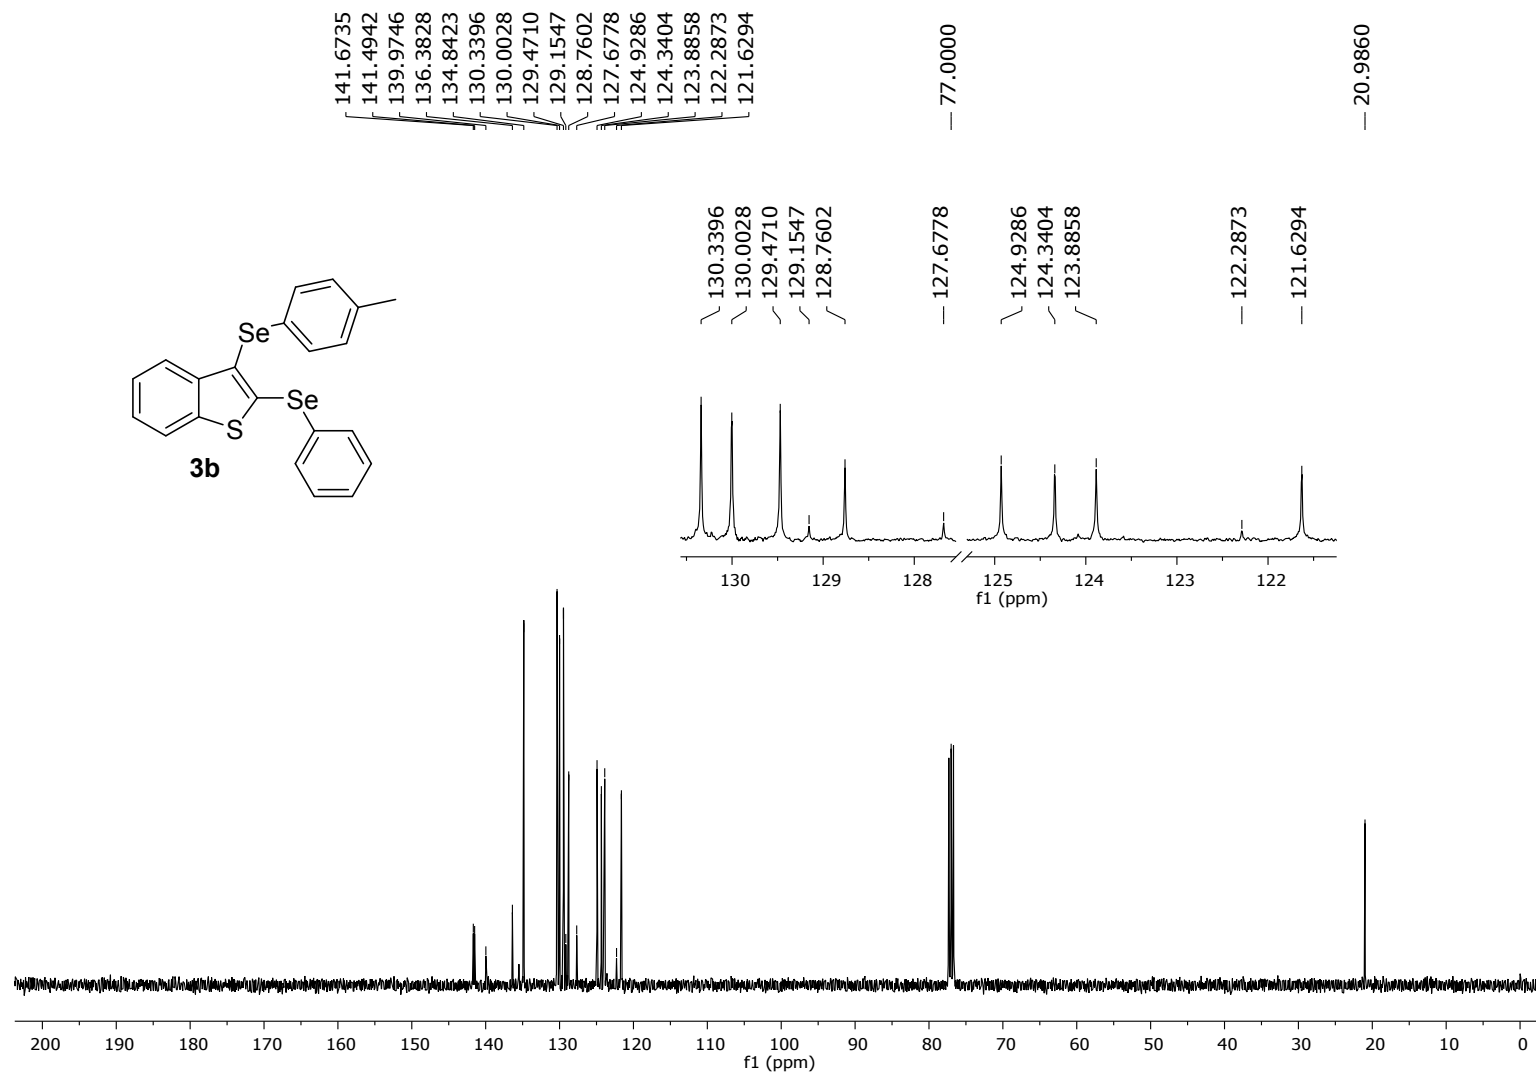

**Figure S4:** <sup>13</sup>C NMR (100 MHz, CDCl<sub>3</sub>) spectrum 2-(phenylselanyl)-3-(4-tolylselanyl)benzo[*b*]thiophene **3b**.

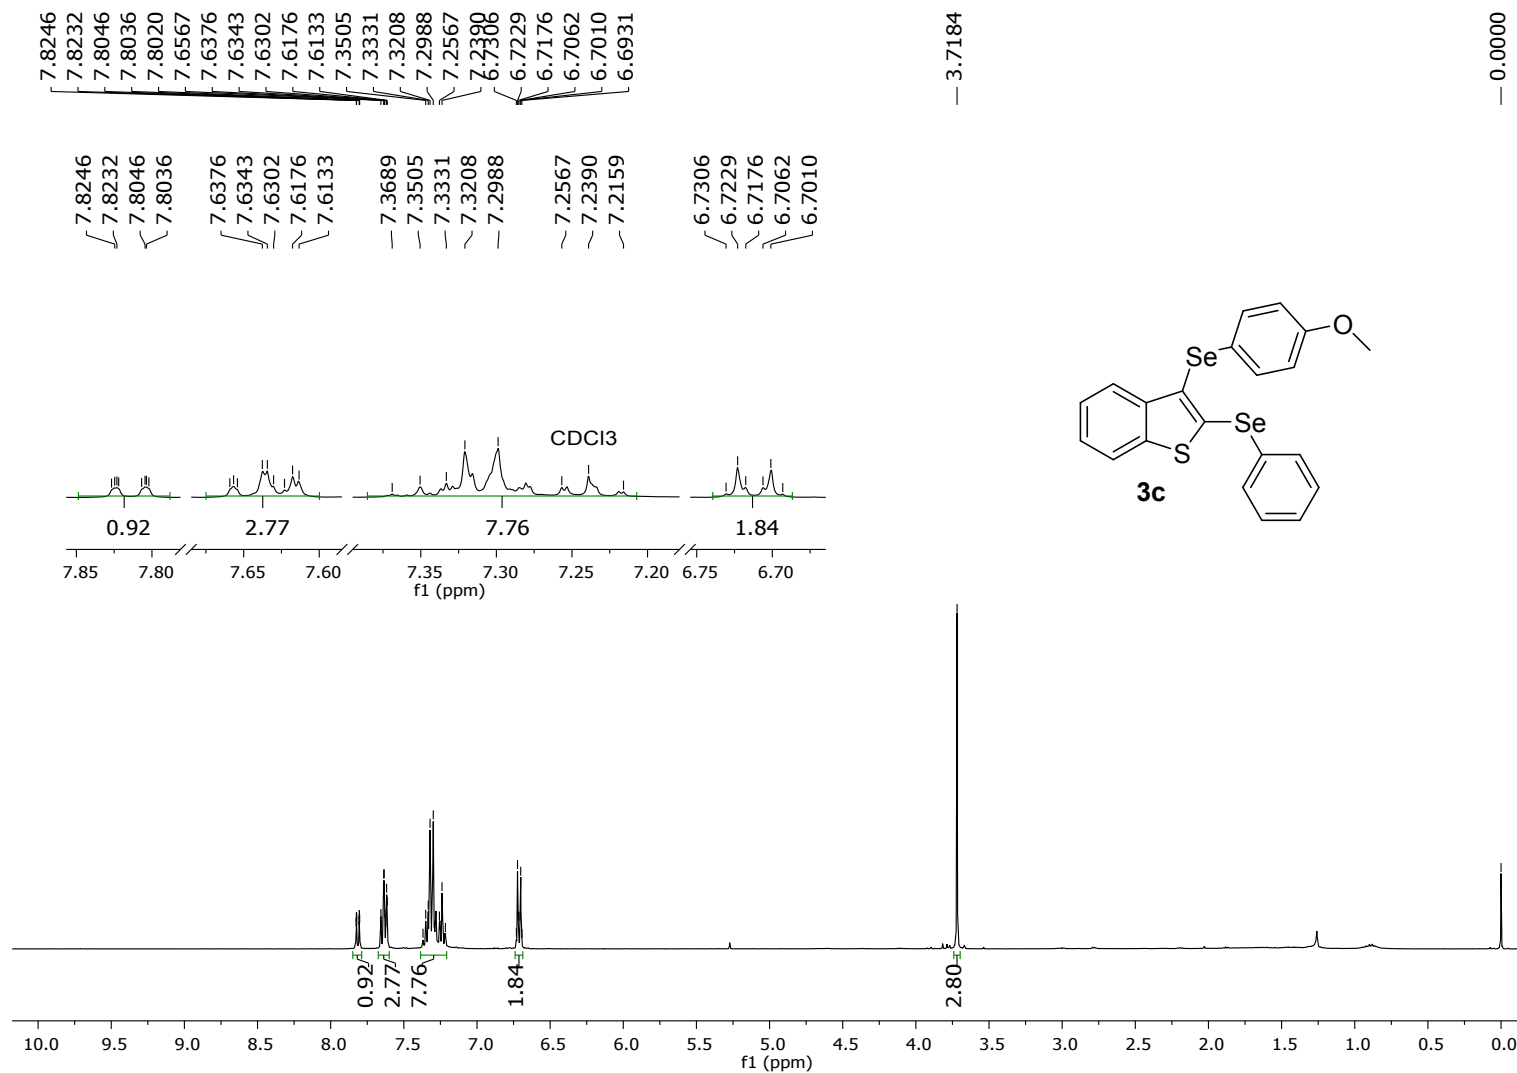

**Figure S5:** <sup>1</sup>H NMR (400 MHz, CDCl<sub>3</sub>) spectrum 3-[(4-methoxyphenyl)selanyl]-2-(phenylselanyl)benzo[*b*]thiophene **3c**.

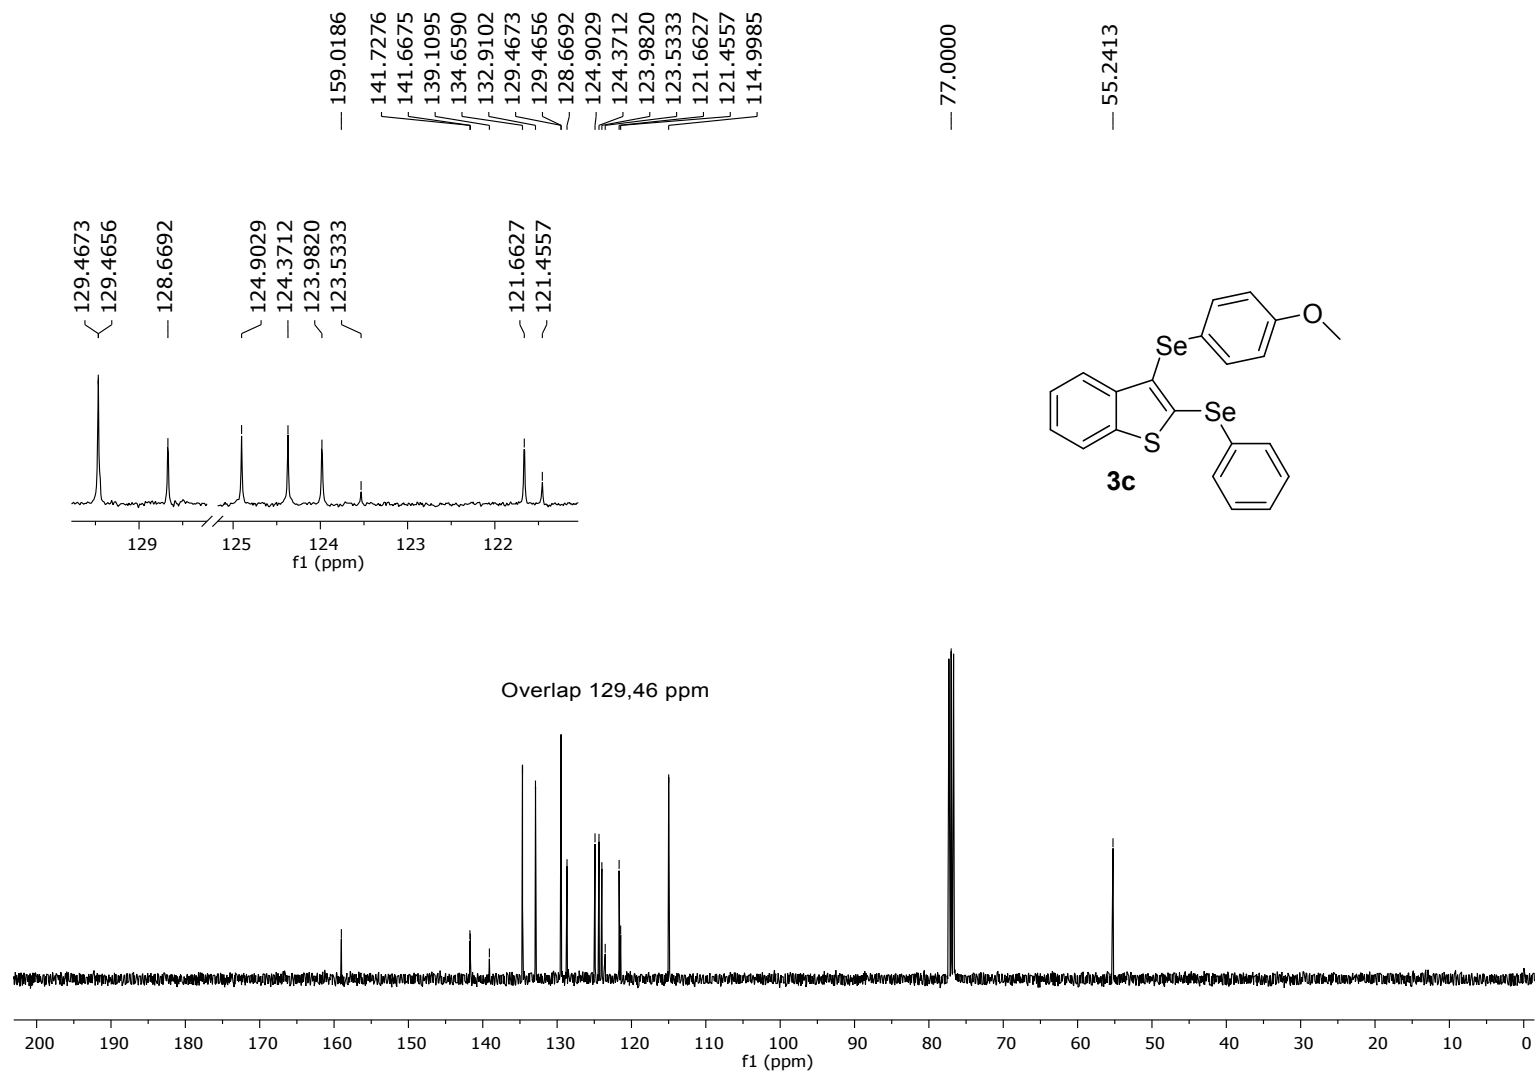

**Figure S6:** <sup>13</sup>C NMR (100 MHz, CDCl<sub>3</sub>) spectrum 3-[(4-methoxyphenyl)selanyl]-2-(phenylselanyl)benzo[*b*]thiophene **3c**.

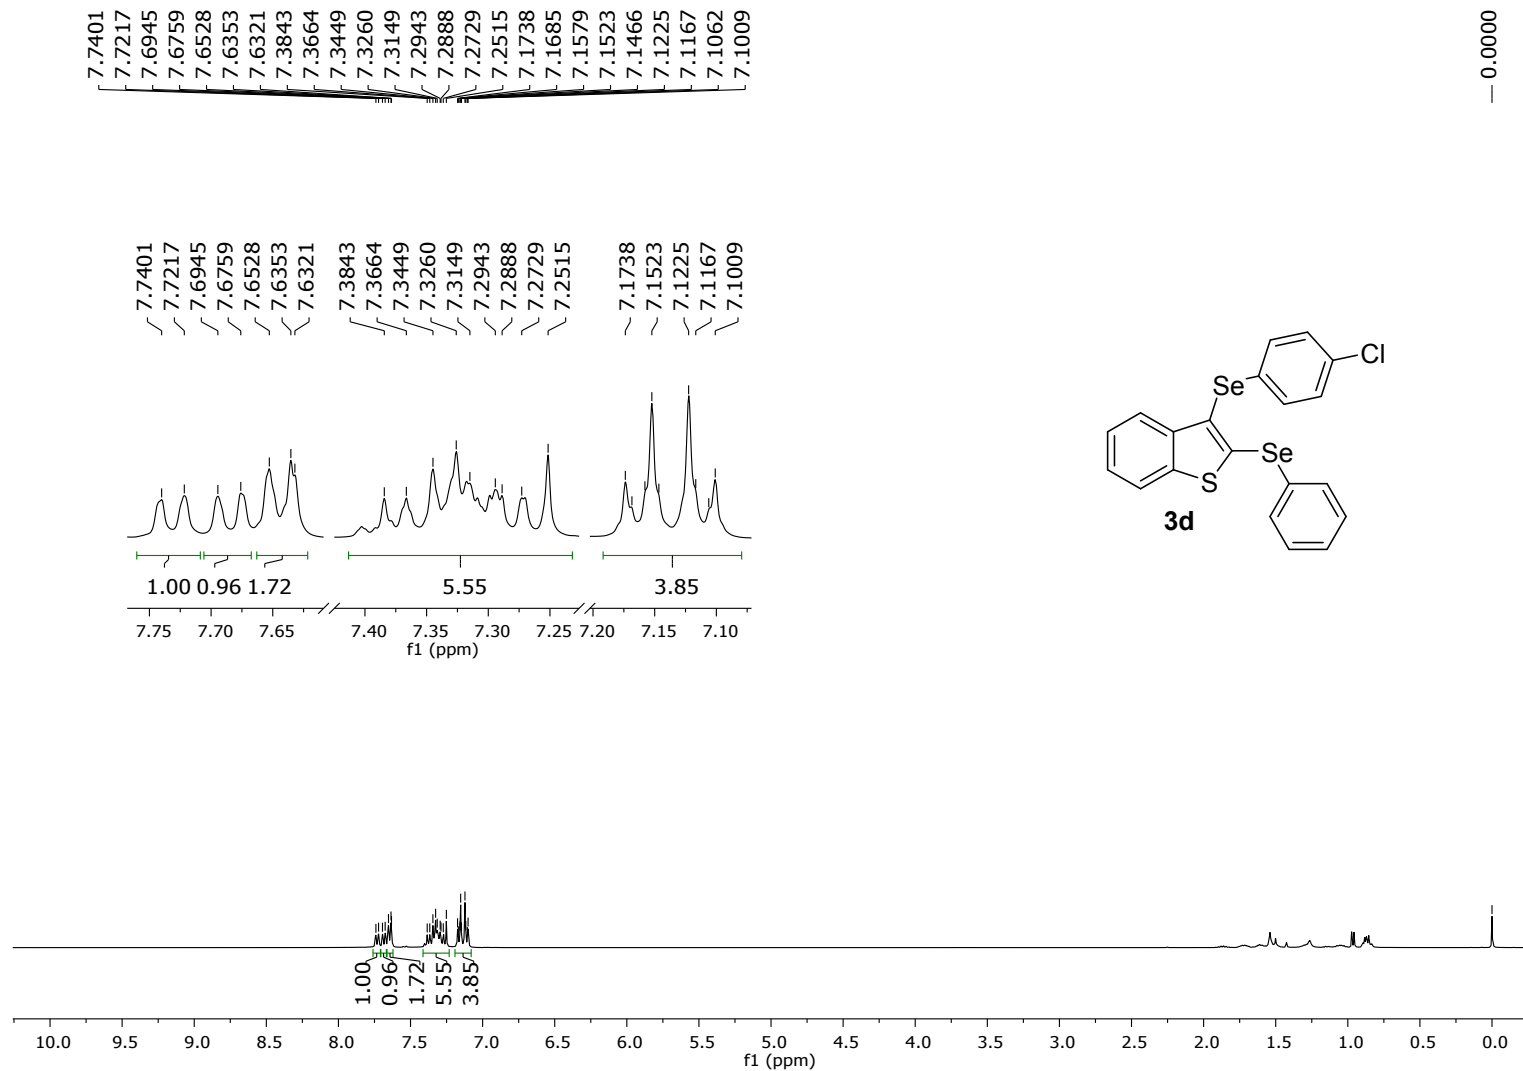

**Figure S7:** <sup>1</sup>H NMR (400 MHz, CDCl<sub>3</sub>) spectrum 3-[(4-Chlorophenyl)selenyl]-2-(phenylselenyl)benzo[*b*]thiophene **3d**.



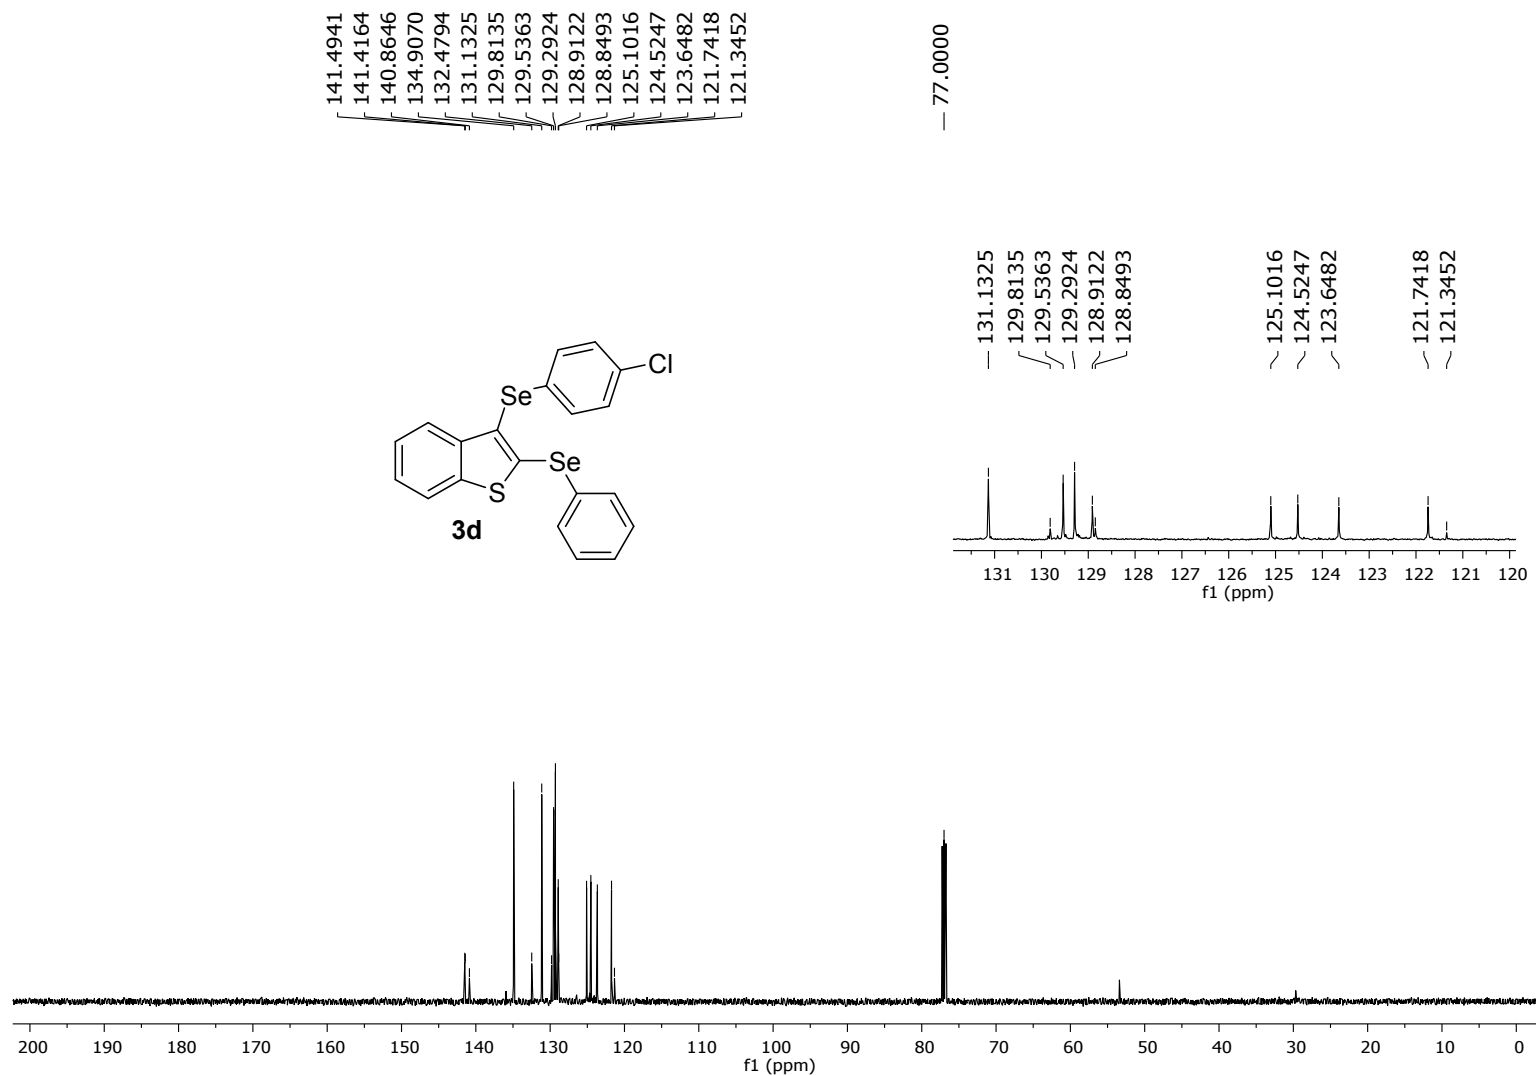

**Figure S8:**  $^{13}\text{C}$  NMR (100 MHz,  $\text{CDCl}_3$ ) spectrum 3-[(4-Chlorophenyl)selanyl]-2-(phenylselanyl)benzo[*b*]thiophene **3d**.

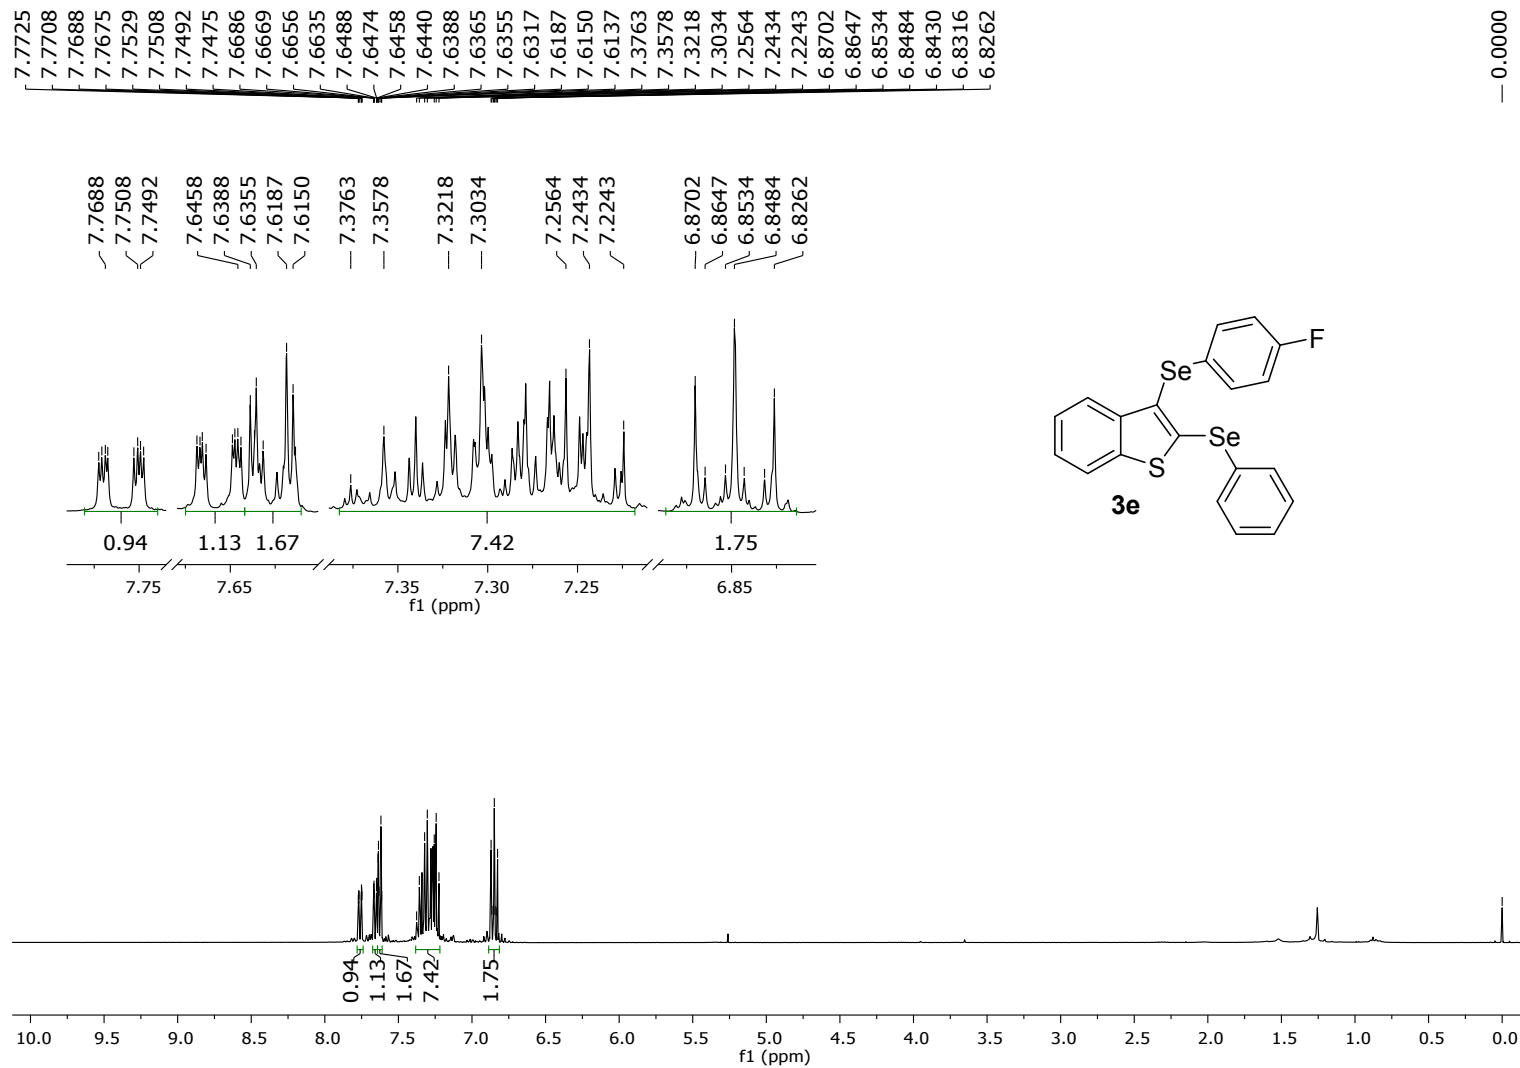

**Figure S9:**  $^1\text{H NMR}$  (400 MHz,  $\text{CDCl}_3$ ) spectrum 3-[(4-fluorophenyl)selanyl]-2-(phenylselanyl)benzo[*b*]thiophene **3e**.

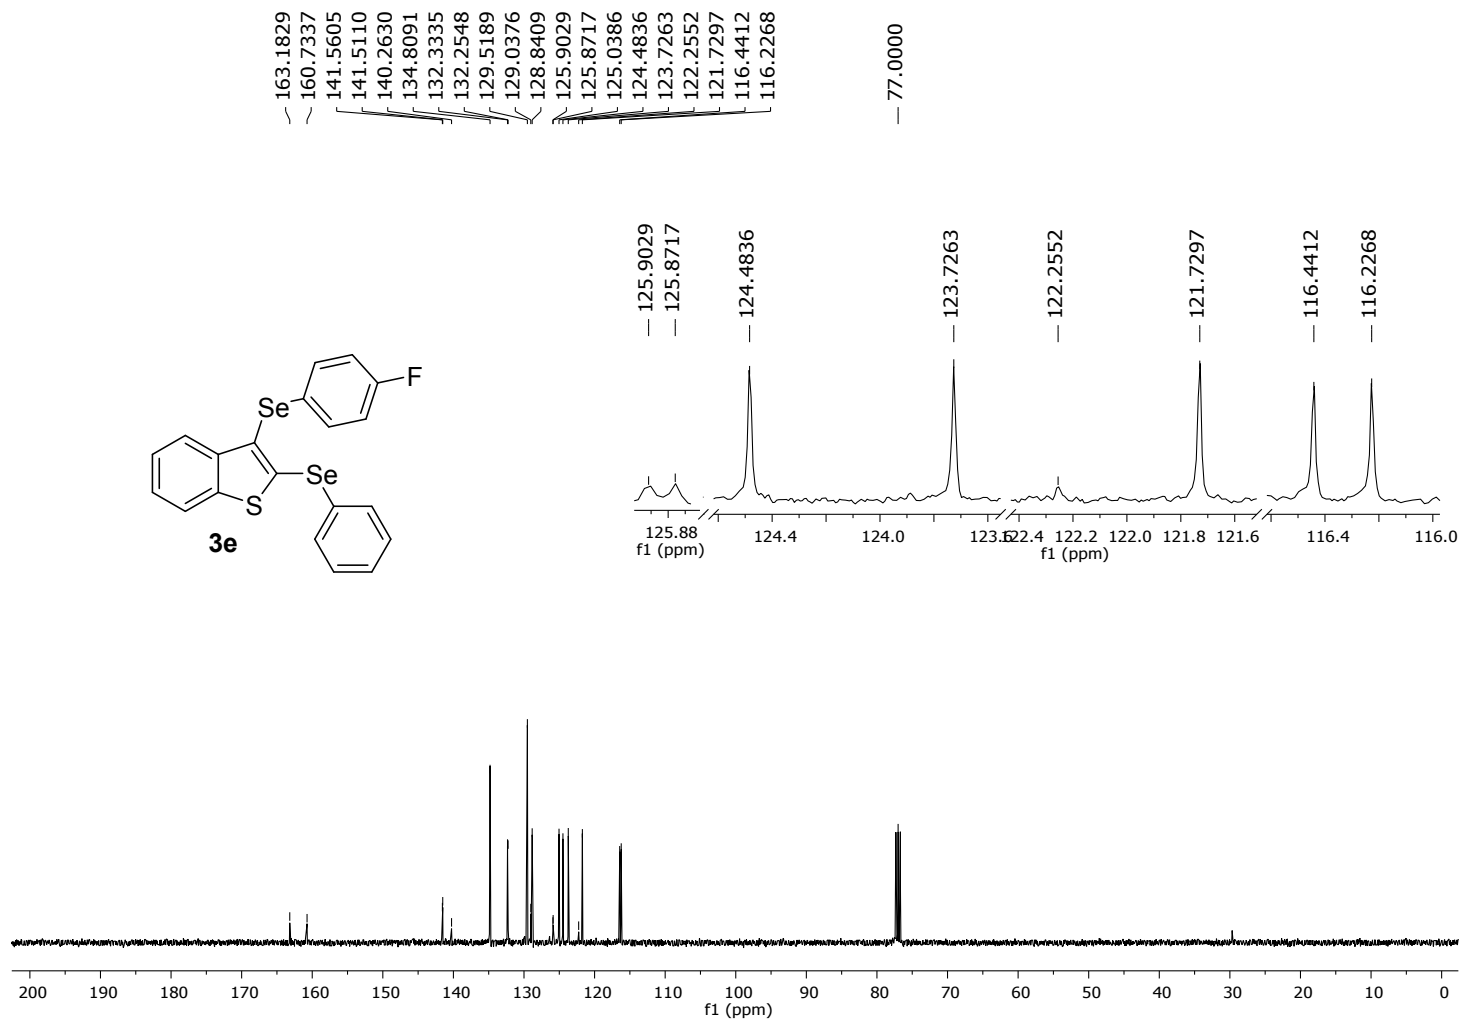

**Figure S10:** <sup>13</sup>C NMR (100 MHz, CDCl<sub>3</sub>) spectrum 3-[(4-fluorophenyl)selanyl]-2-(phenylselanyl)benzo[*b*]thiophene **3e**.

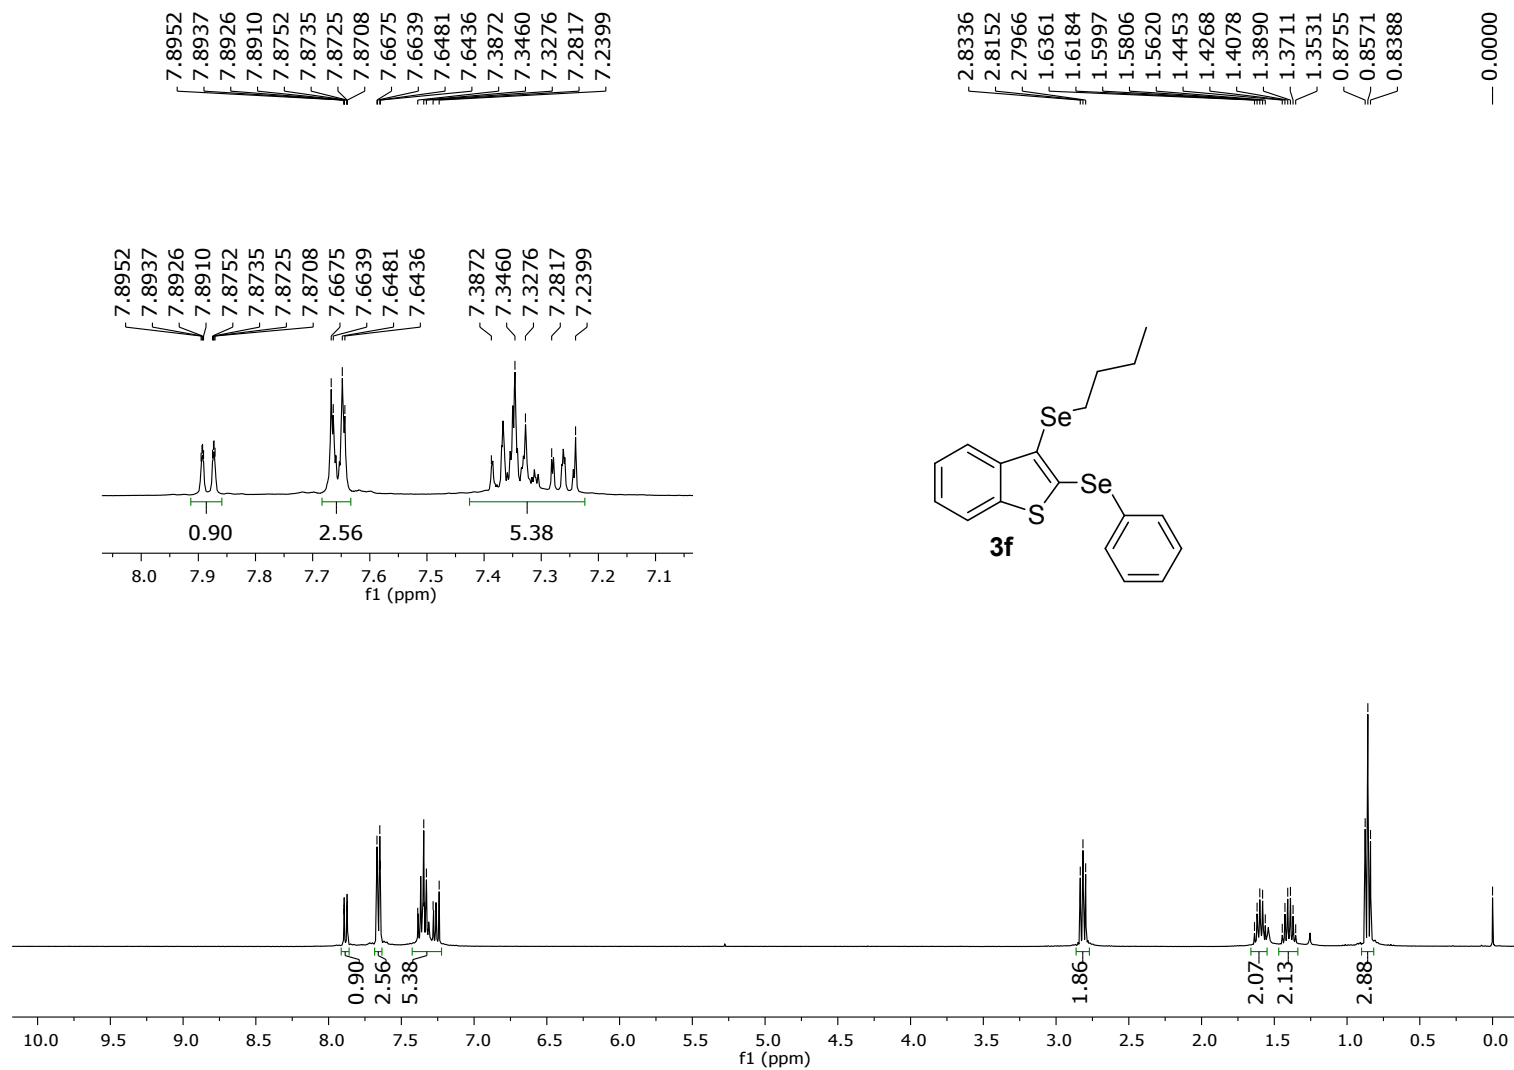

**Figure S11:** <sup>1</sup>H NMR (400 MHz, CDCl<sub>3</sub>) spectrum 3-(butylselanyl)-2-(phenylselanyl)benzo[b]thiophene **3f**.

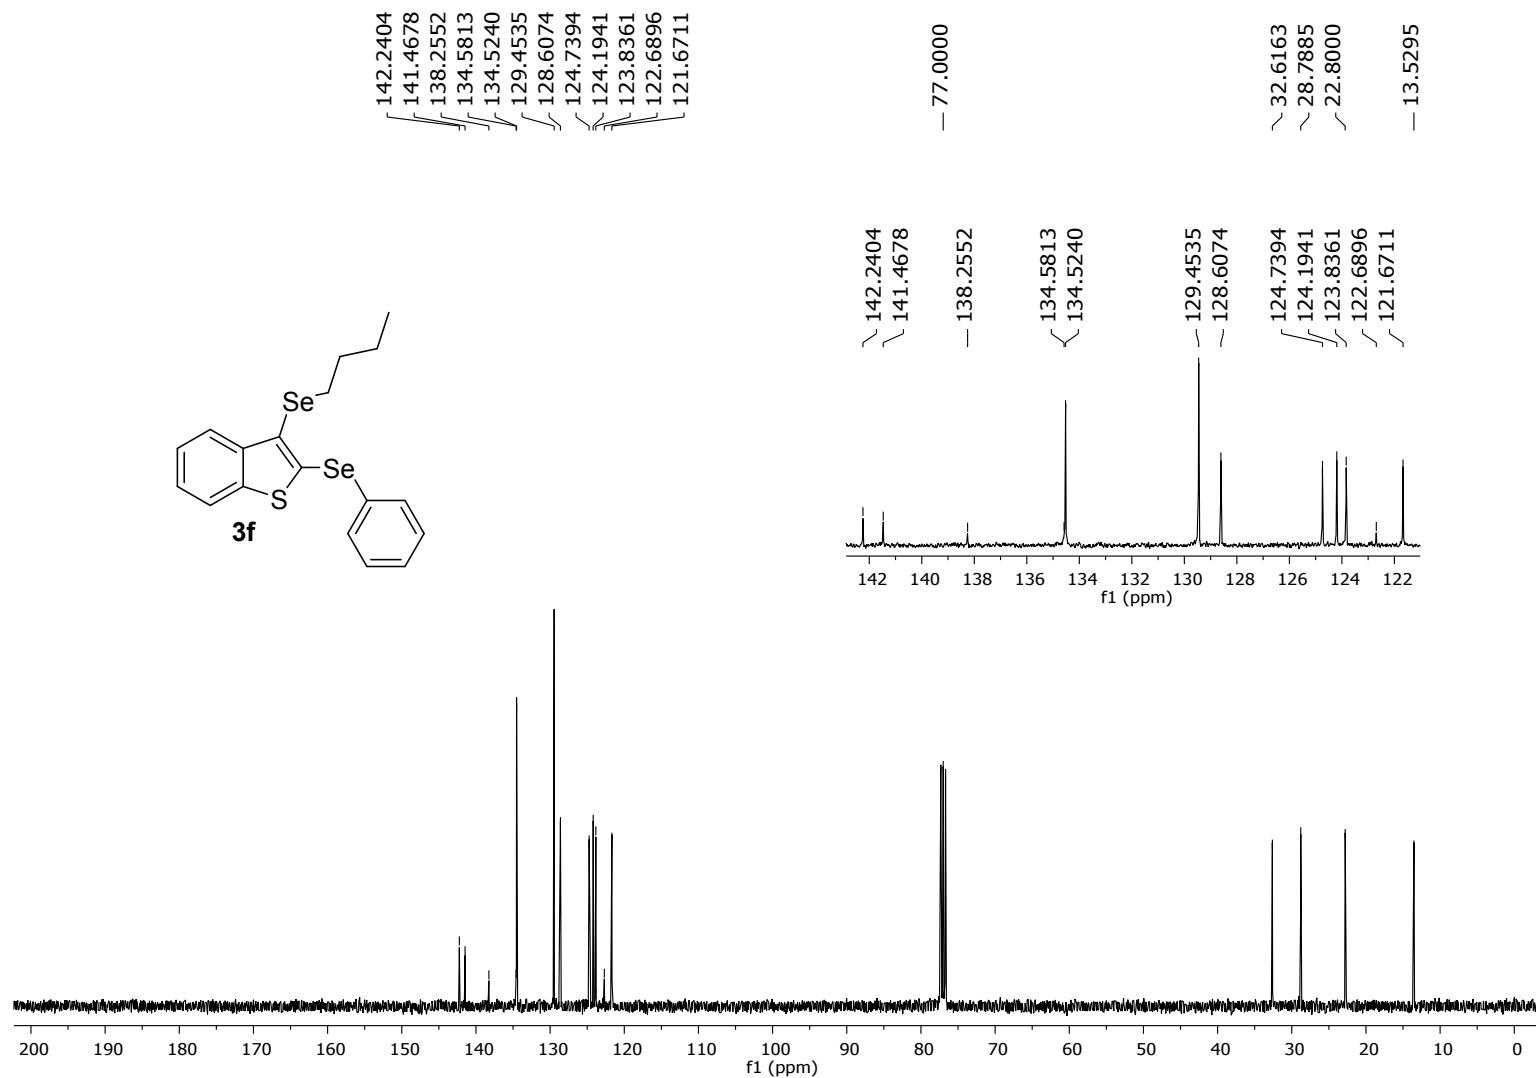

**Figure S12:** <sup>13</sup>C NMR (100 MHz, CDCl<sub>3</sub>) spectrum 3-(butylselanyl)-2-(phenylselanyl)benzo[*b*]thiophene **3f**.

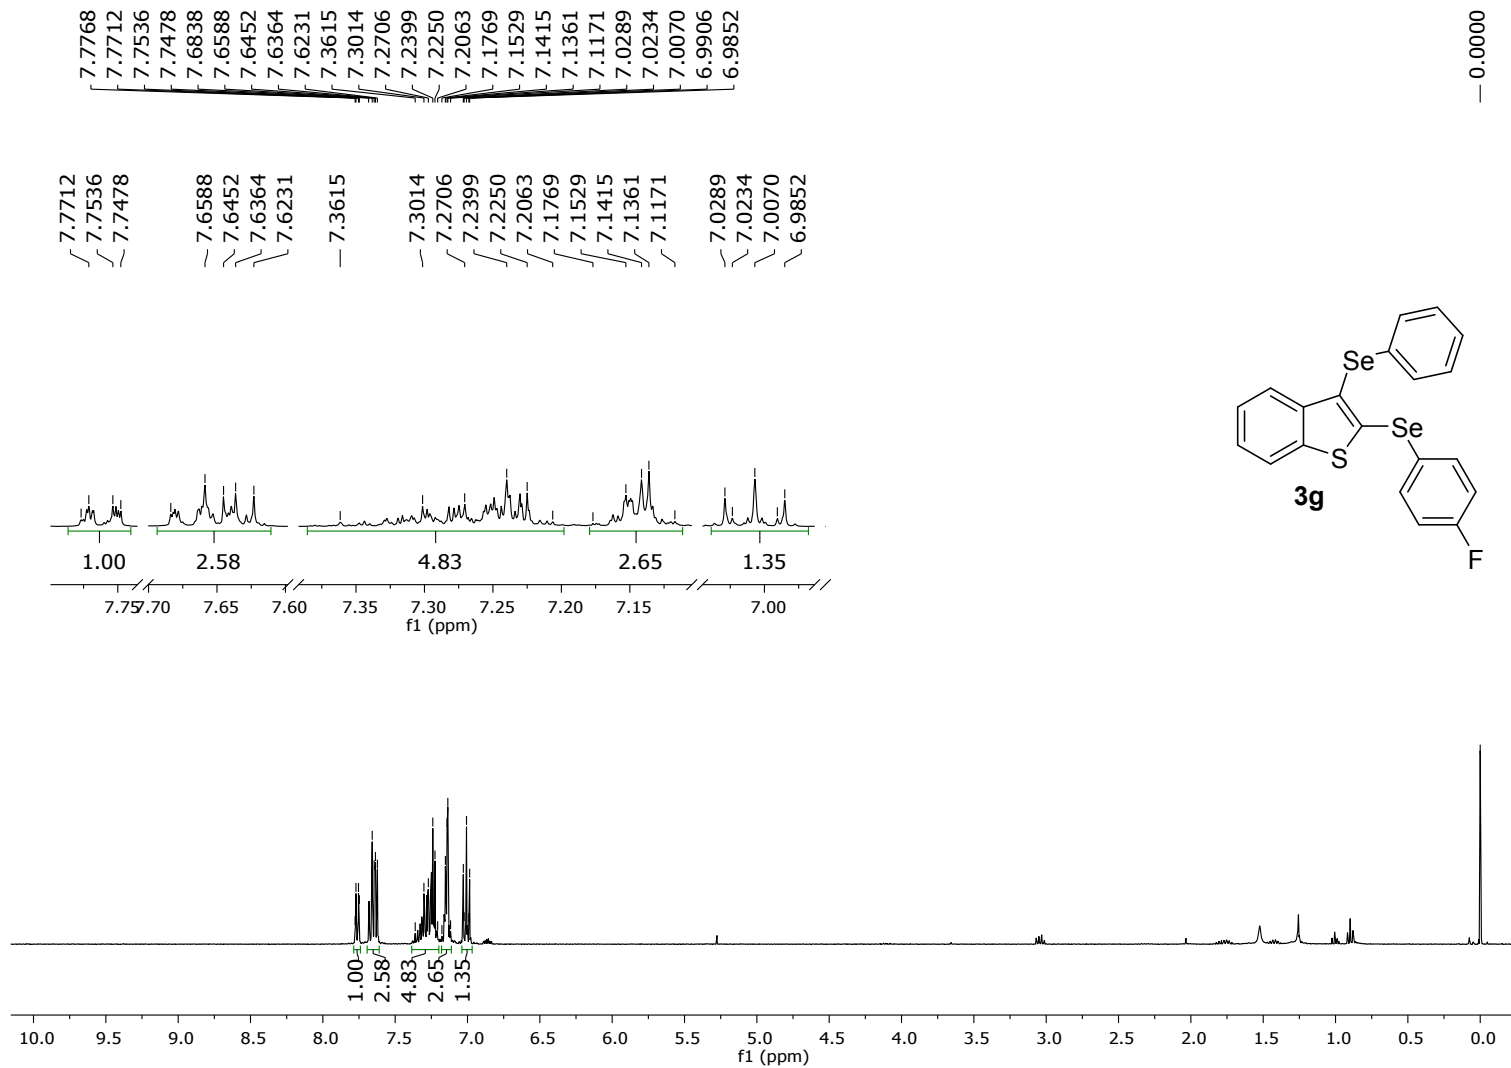

**Figure S13:** <sup>1</sup>H NMR (400 MHz, CDCl<sub>3</sub>) spectrum 2-[(4-fluorophenyl)selanyl]-3-(phenylselanyl)benzo[*b*]thiophene **3g**.

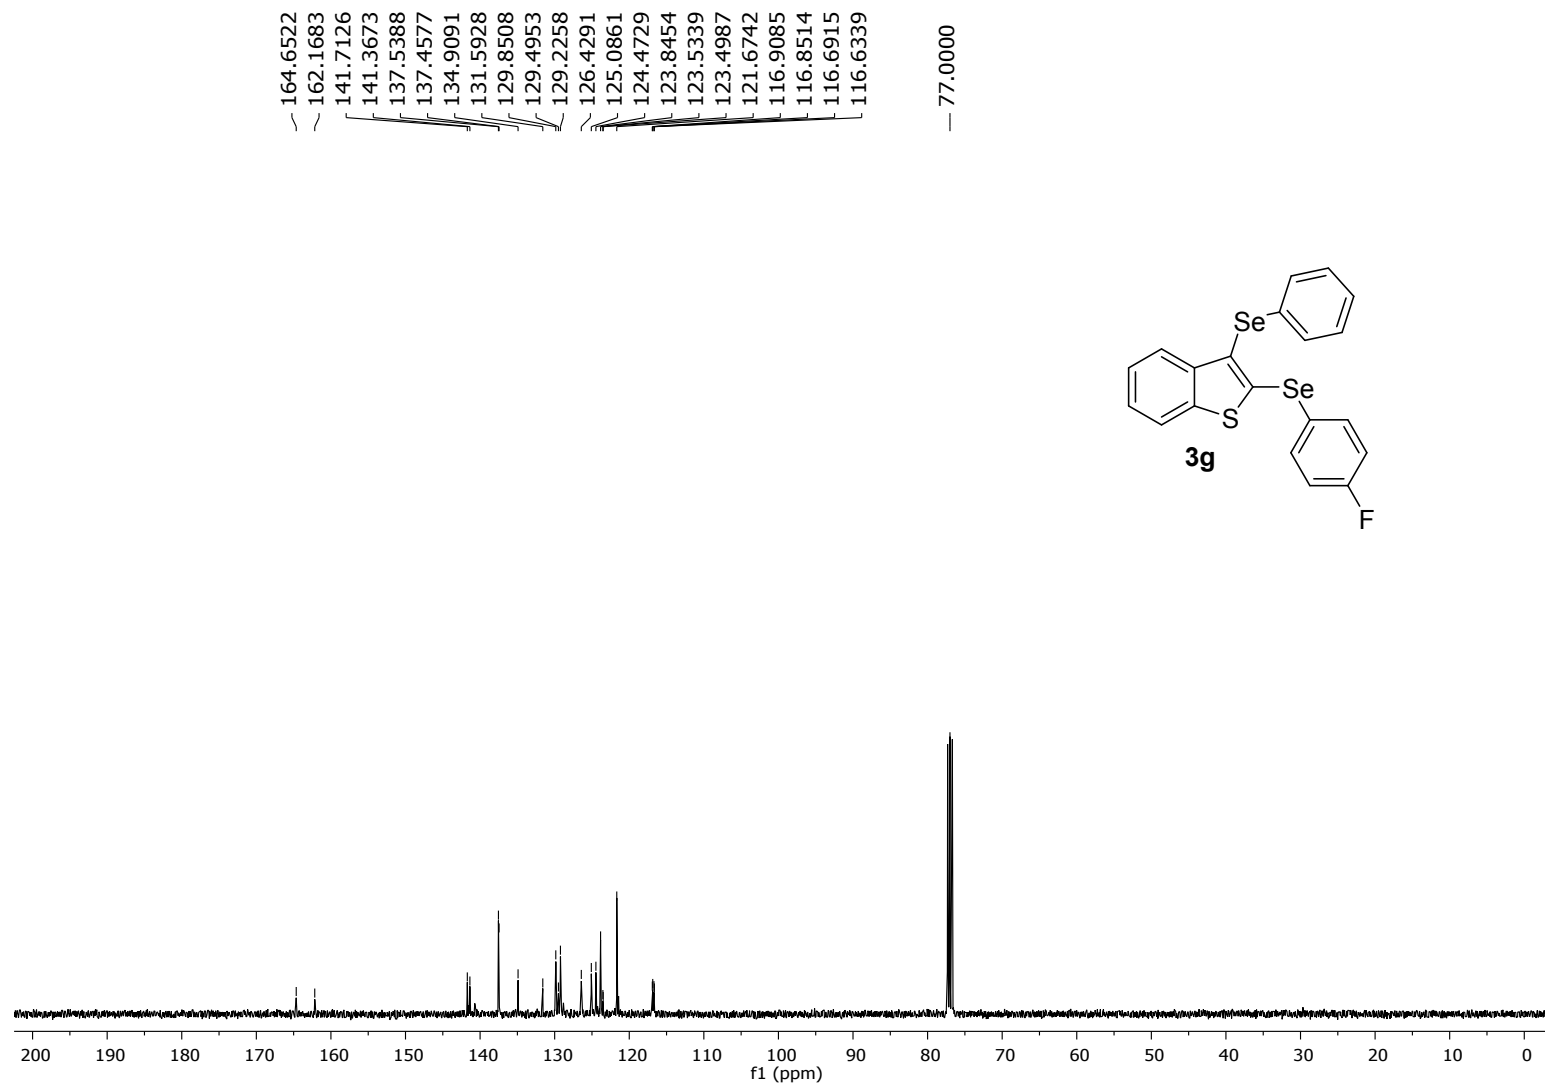

Figure S14: <sup>13</sup>C NMR (100 MHz, CDCl<sub>3</sub>) spectrum 2-[4-fluorophenyl]selanyl]-3-(phenylselanyl)benzo[*b*]thiophene **3g**.

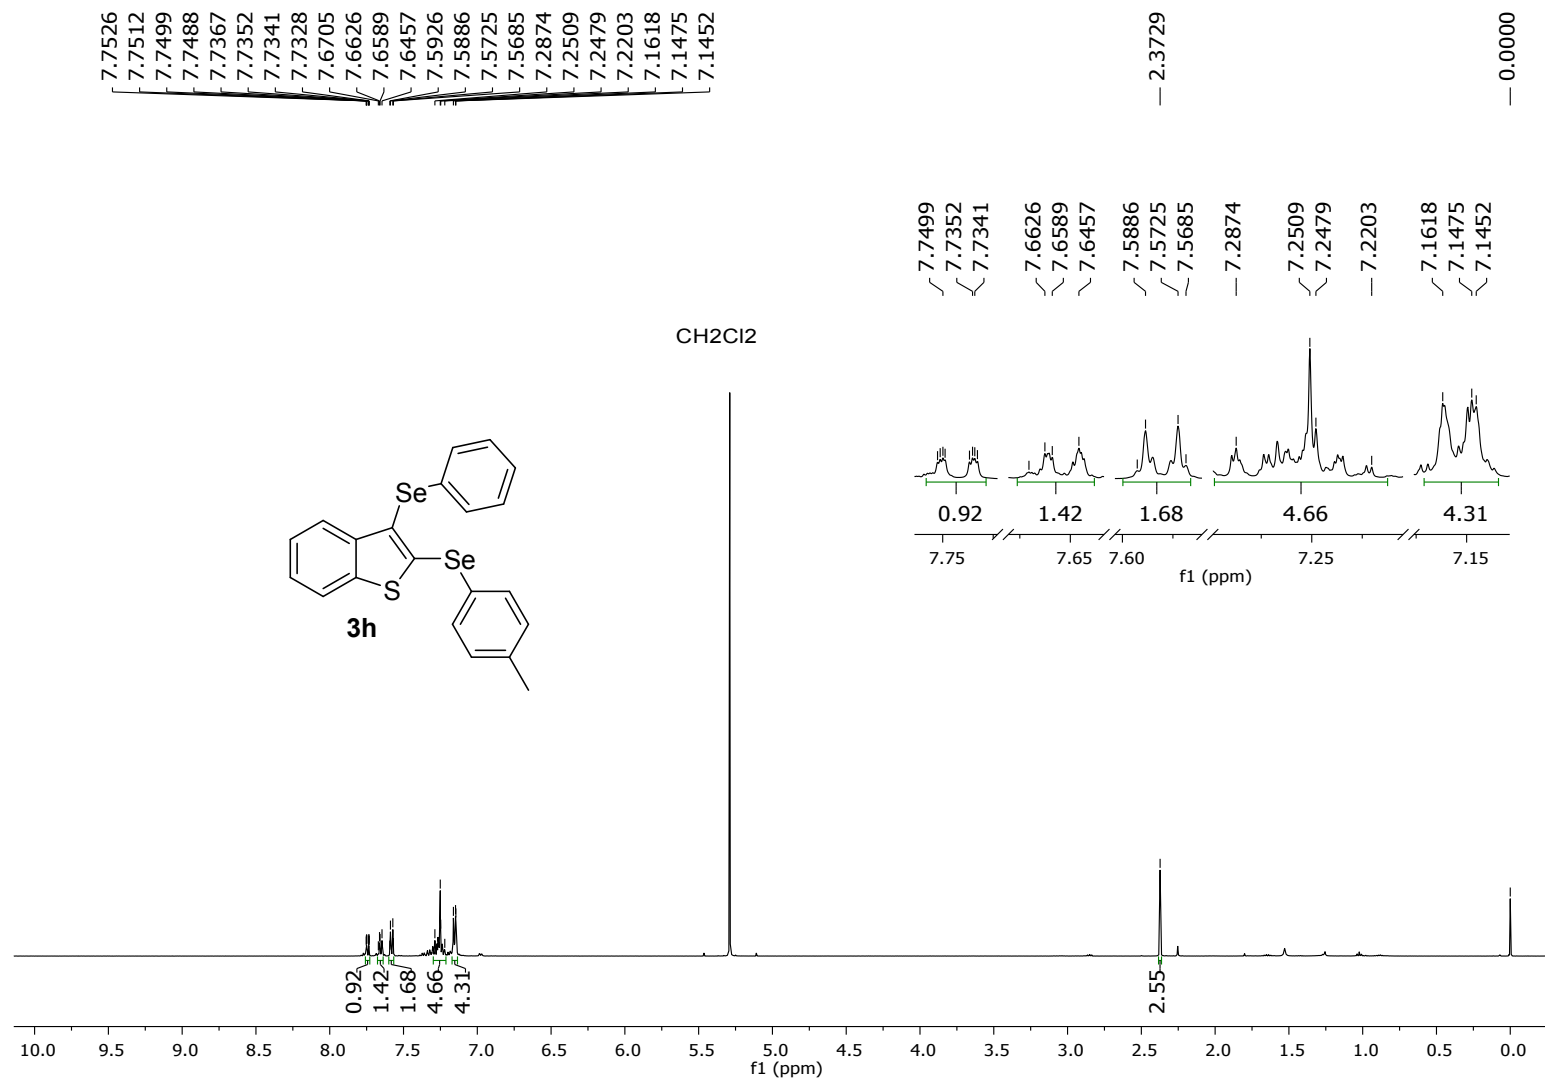

**Figure S15:**  $^1\text{H}$  NMR (400 MHz,  $\text{CDCl}_3$ ) spectrum 3-(phenylselanyl)-2-(4-tolylselanyl)benzo[*b*]thiophene **3h**.



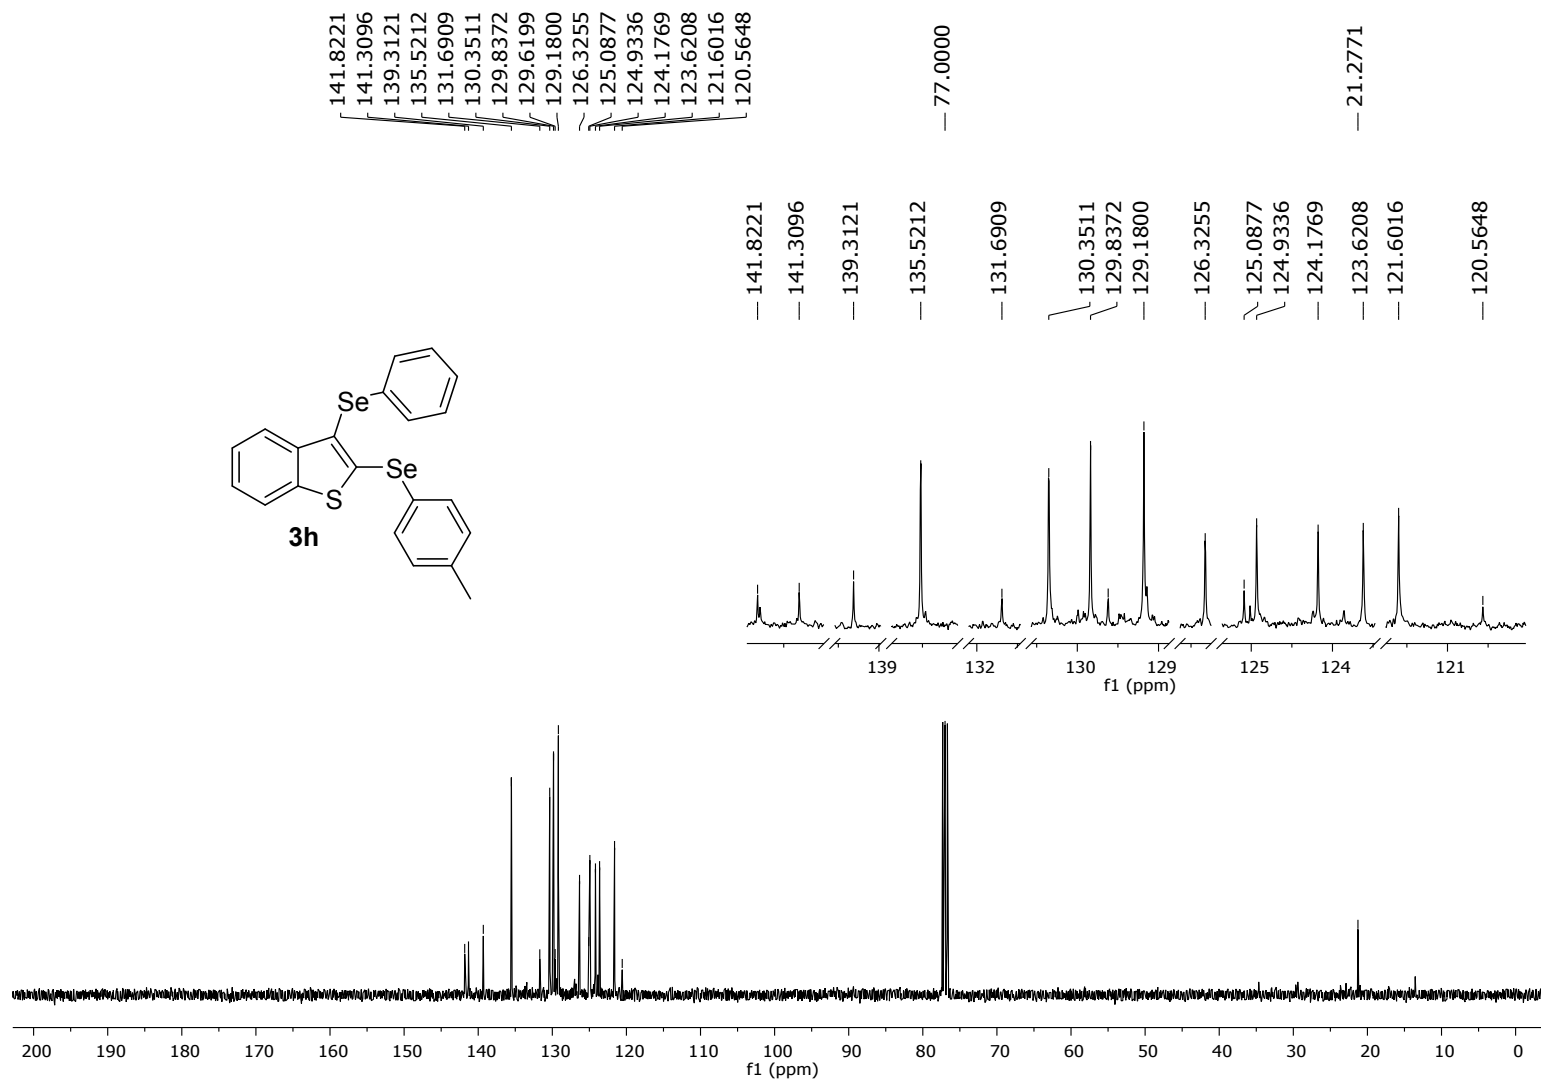

**Figure S16:** <sup>13</sup>C NMR (100 MHz, CDCl<sub>3</sub>) spectrum 3-(phenylselanyl)-2-(4-tolylselanyl)benzo[*b*]thiophene **3h**.

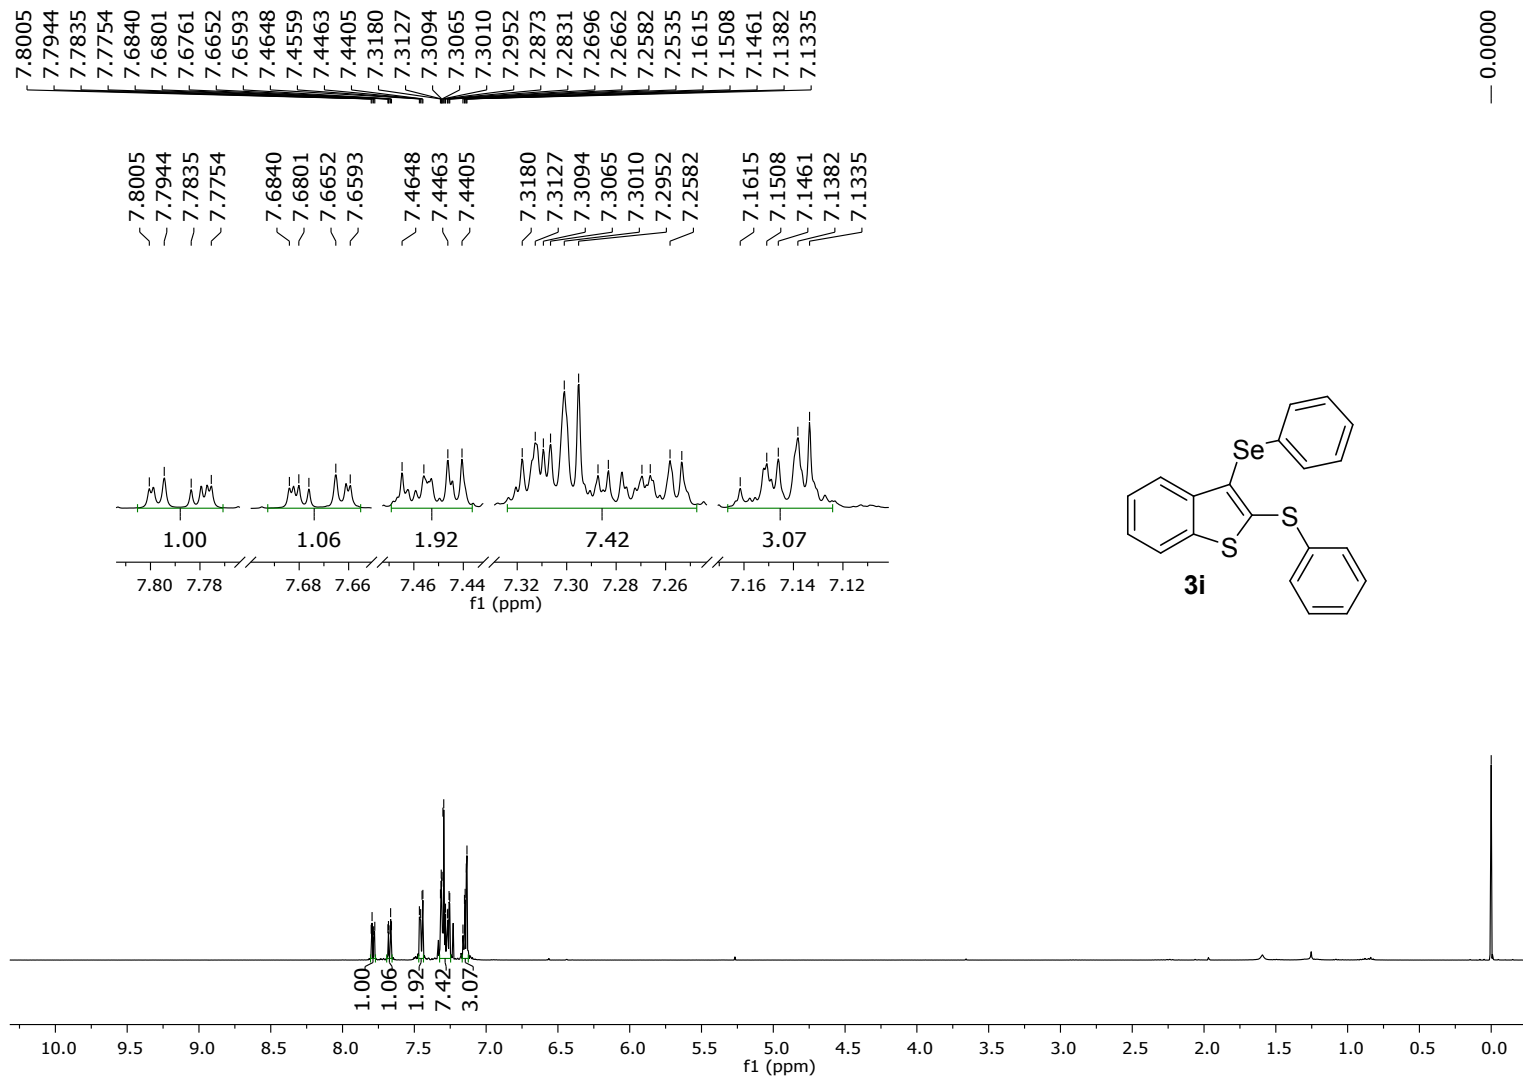

**Figure S17:** <sup>1</sup>H NMR (400 MHz, CDCl<sub>3</sub>) spectrum 3-(phenylselanyl)-2-(phenylsulfanyl)benzo[b]thiophene **3i**.

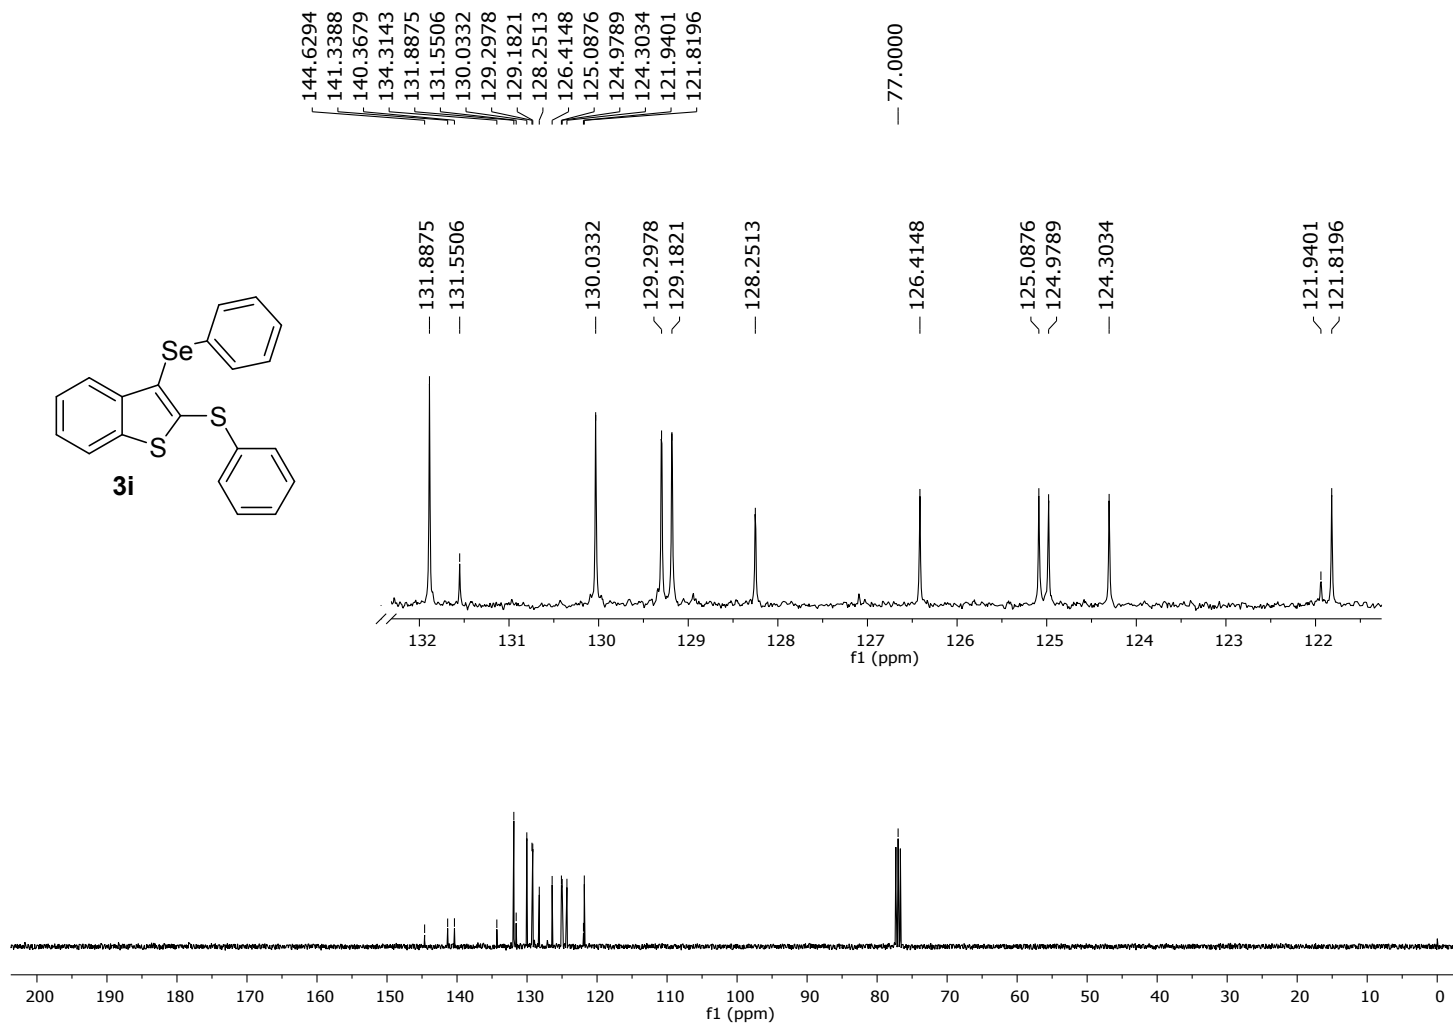

**Figure S18:** <sup>13</sup>C NMR (100 MHz, CDCl<sub>3</sub>) spectrum 3-(phenylselanyl)-2-(phenylsulfanyl)benzo[*b*]thiophene **3i**.

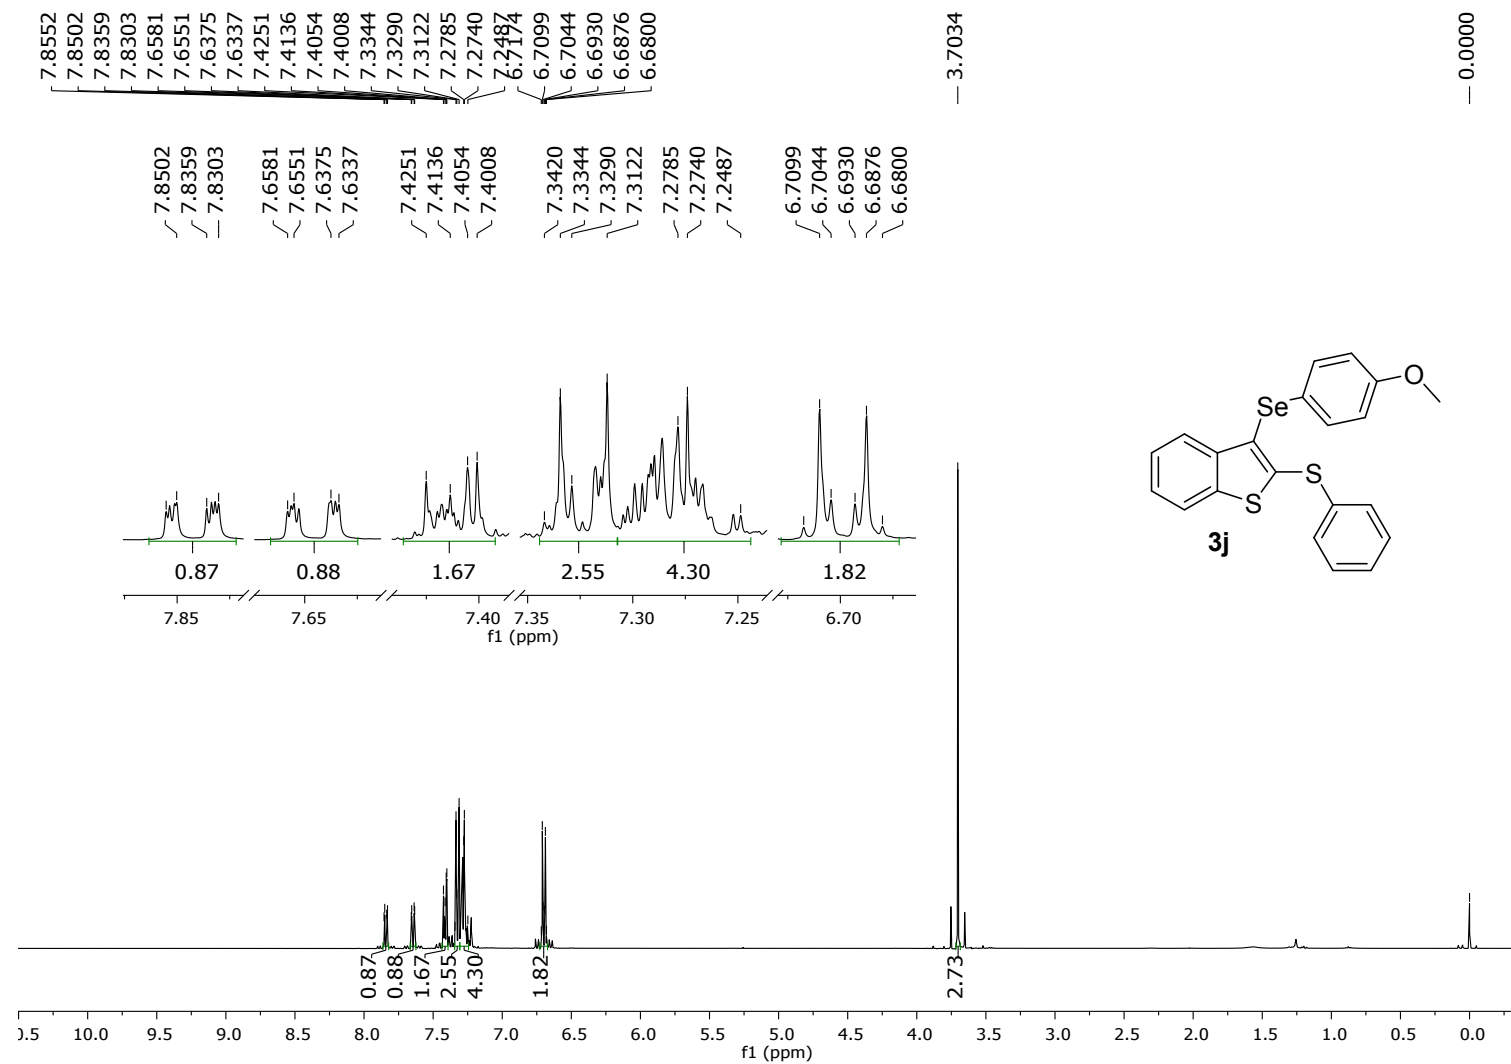

**Figure S19:** <sup>1</sup>H NMR (400 MHz, CDCl<sub>3</sub>) spectrum 3-[(4-methoxyphenyl)selanyl]-2-(phenylsulfanyl)benzo[*b*]thiophene **3j**.

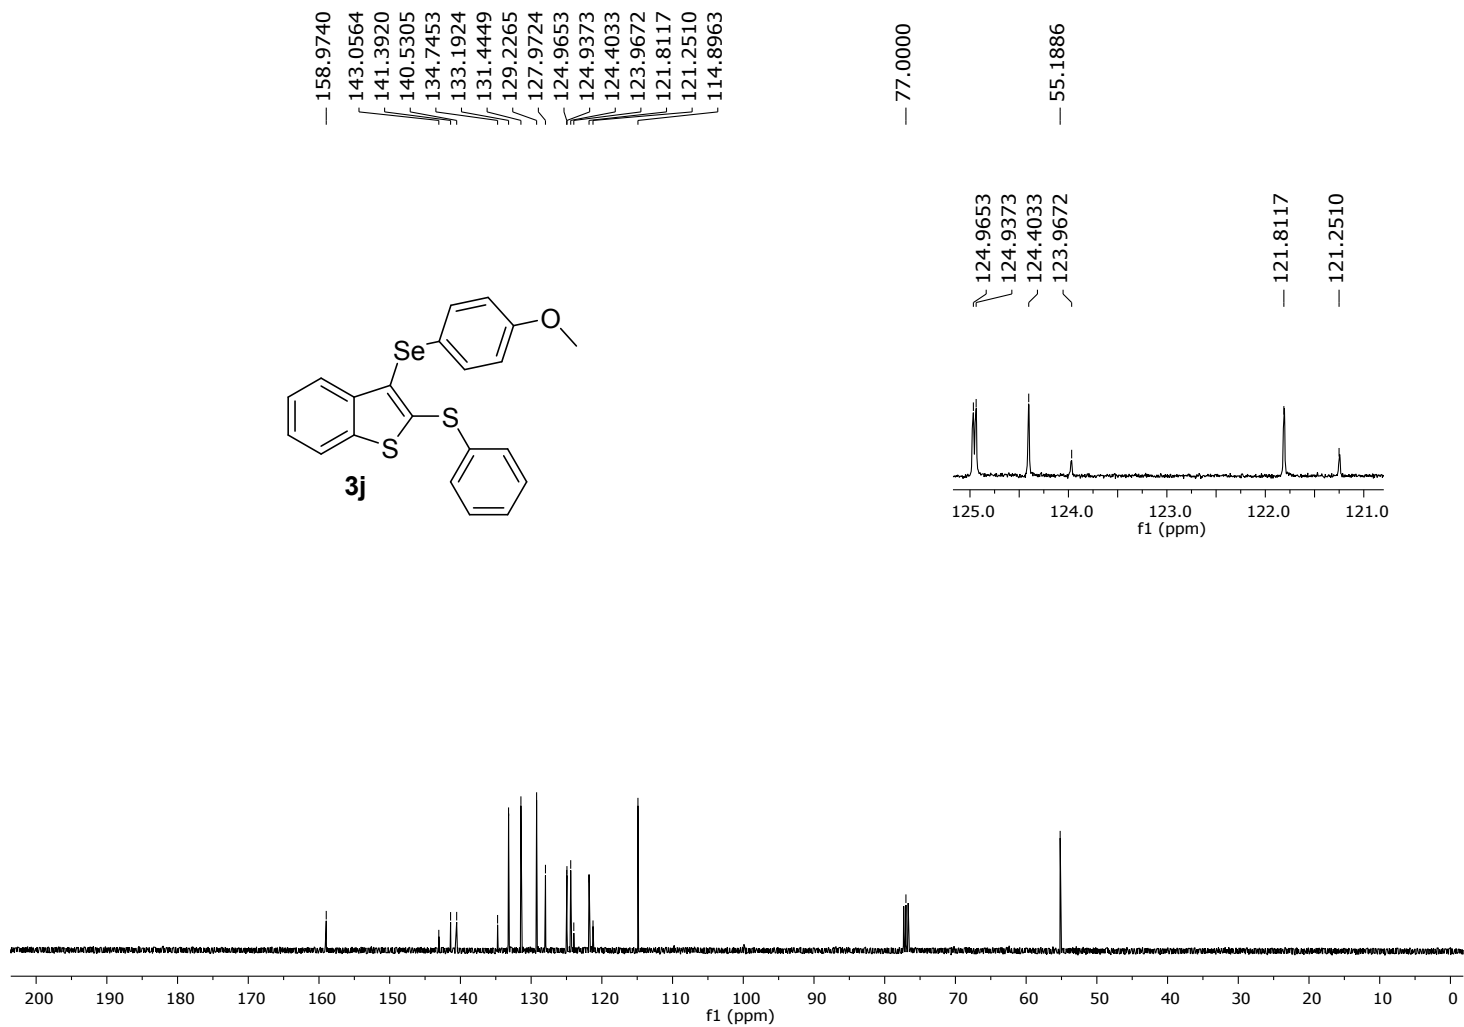

**Figure S20:** <sup>13</sup>C NMR (100 MHz, CDCl<sub>3</sub>) spectrum 3-[(4-methoxyphenyl)selanyl]-2-(phenylsulfanyl)benzo[*b*]thiophene **3j**.

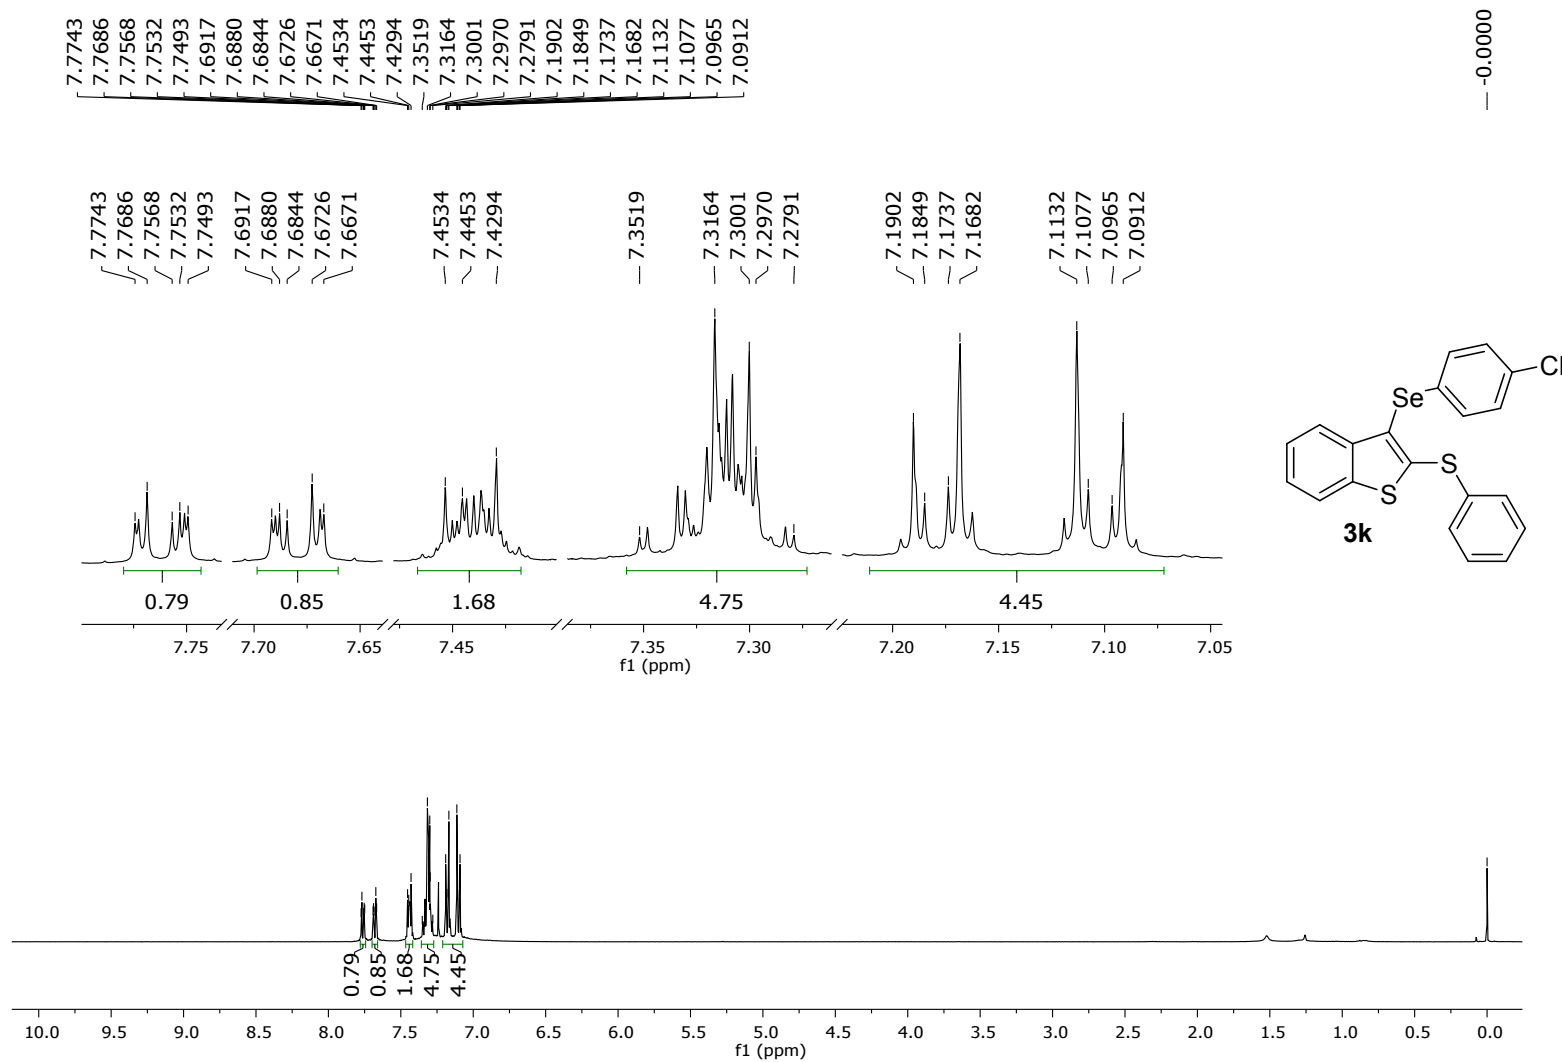

**Figure S21:**  $^1\text{H}$  NMR (400 MHz,  $\text{CDCl}_3$ ) spectrum 3-[(4-chlorophenyl)selanyl]-2-(phenylsulfanyl)benzo[*b*]thiophene **3k**.

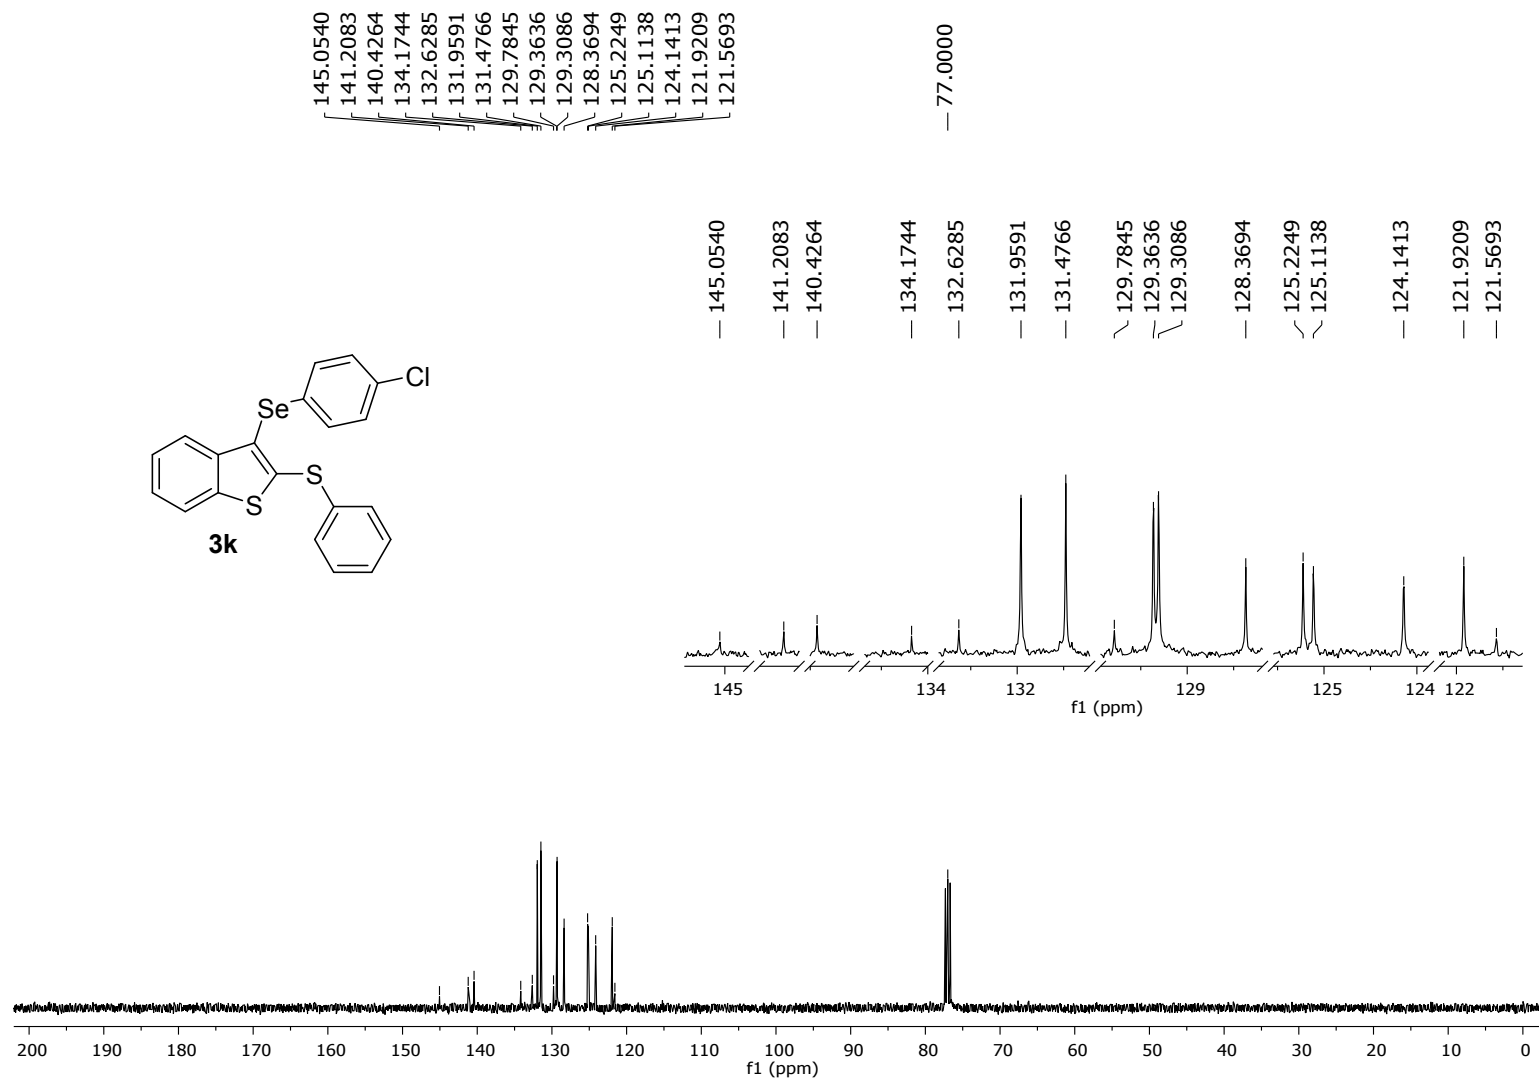

**Figure S22:** <sup>13</sup>C NMR (100 MHz, CDCl<sub>3</sub>) spectrum 3-[(4-chlorophenyl)selanyl]-2-(phenylsulfanyl)benzo[b]thiophene **3k**.

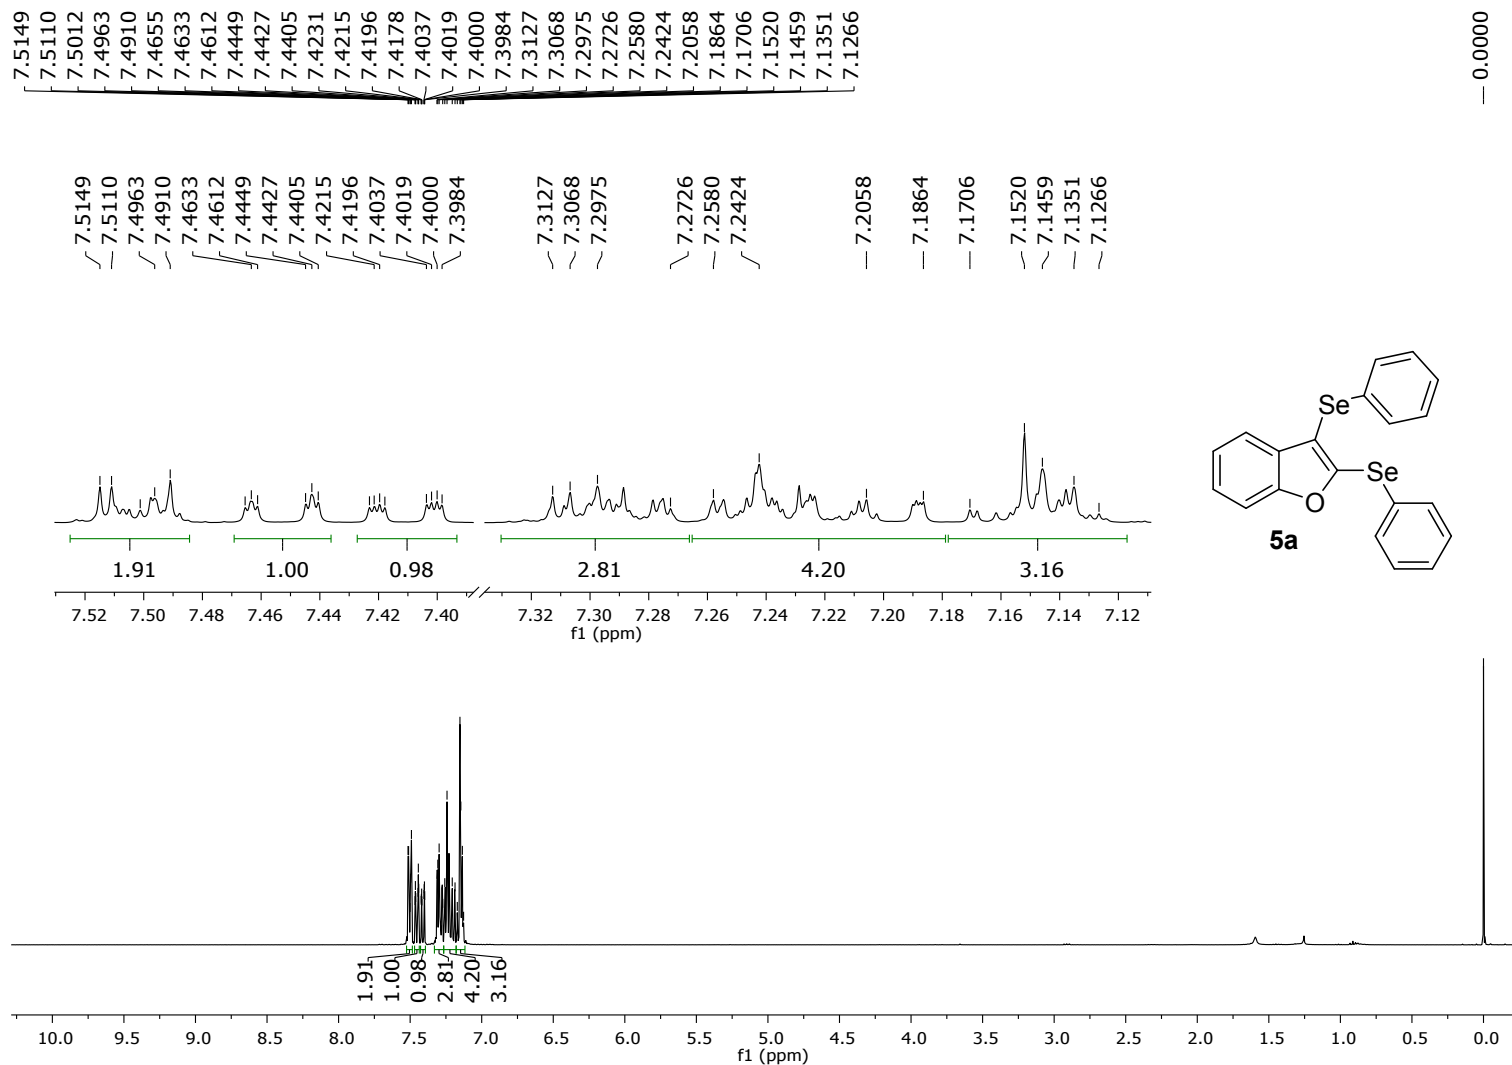

**Figure S23:** <sup>1</sup>H NMR (400 MHz, CDCl<sub>3</sub>) spectrum 2,3-bis(phenylselanyl)benzo[*b*]furan **5a**.



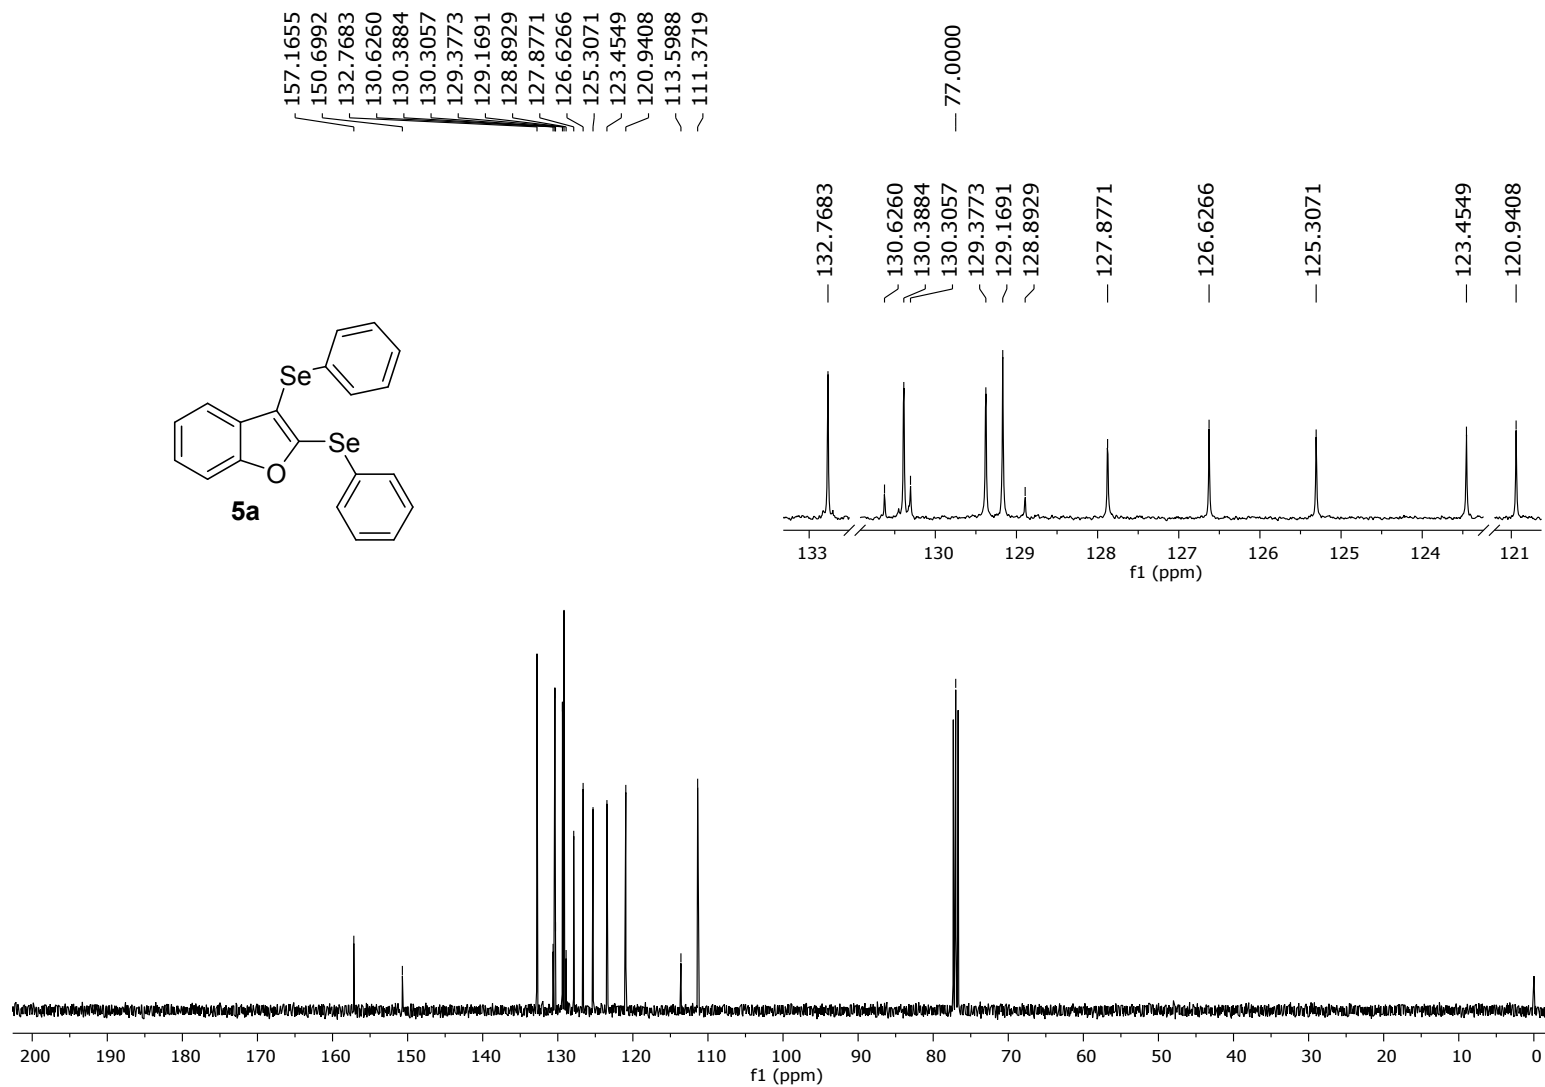

Figure S24:  $^{13}\text{C}$  NMR (100 MHz,  $\text{CDCl}_3$ ) spectrum 2,3-bis(phenylselanyl)benzo[*b*]furan **5a**.

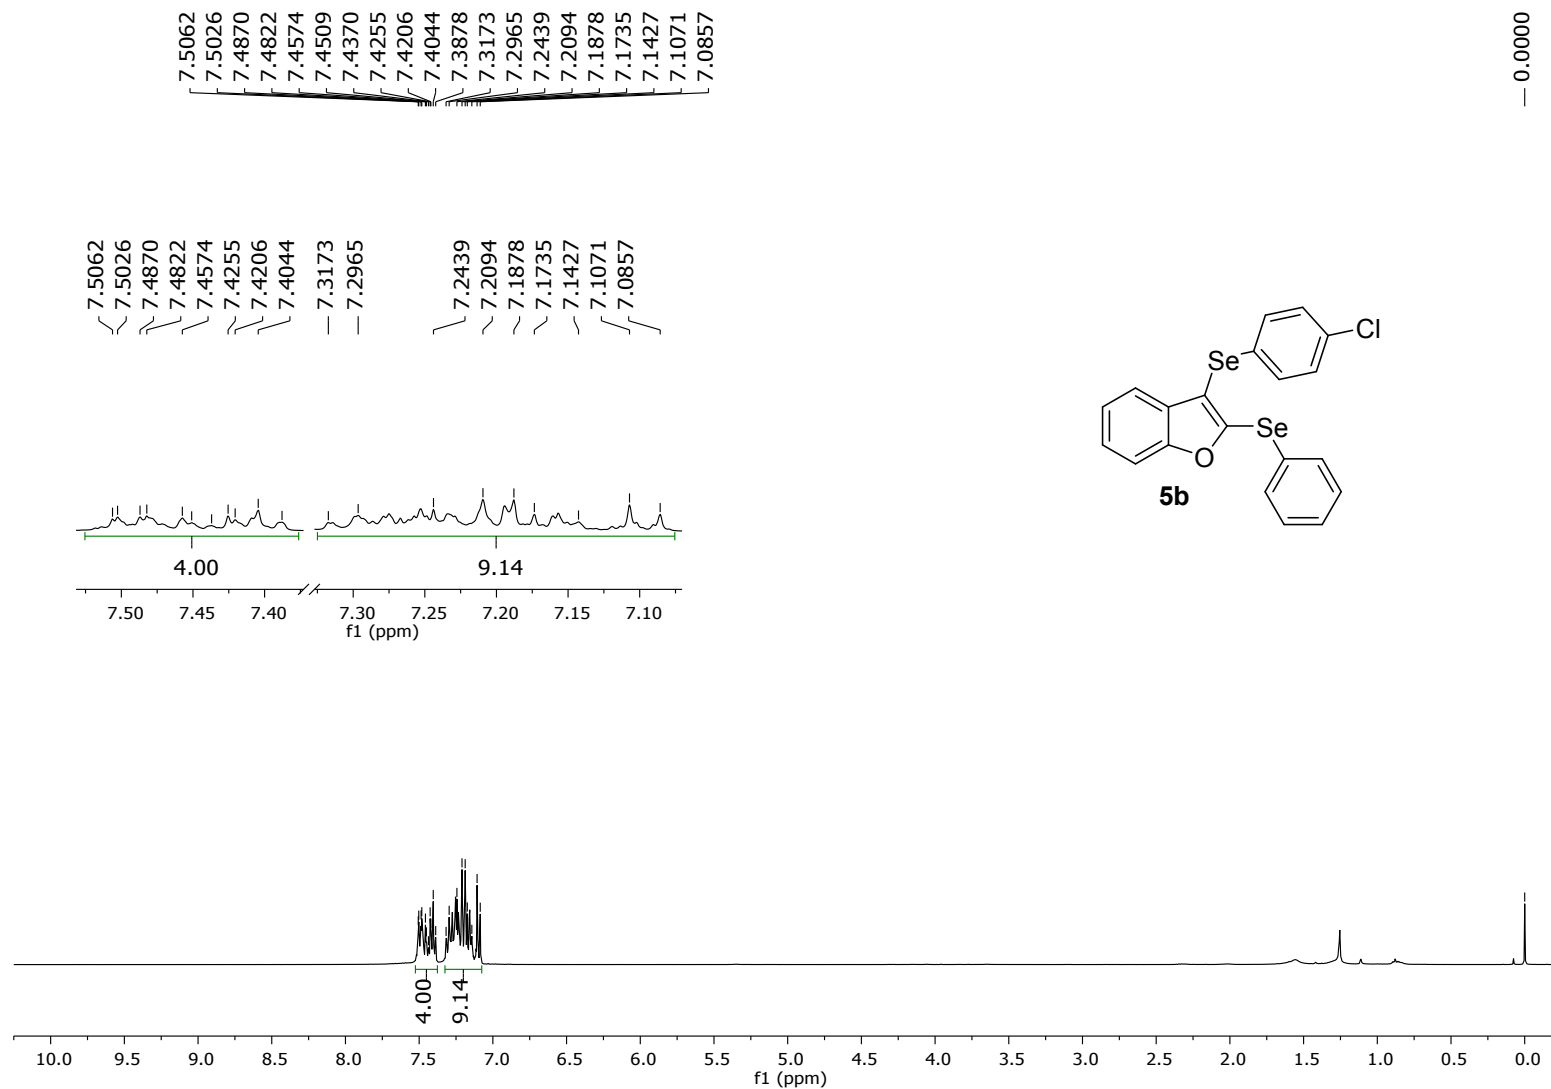

**Figure S25:** <sup>1</sup>H NMR (400 MHz, CDCl<sub>3</sub>) spectrum 3-[(4-chlorophenyl)selanyl]-2-(phenylselanyl)benzo[*b*]furan **5b**.

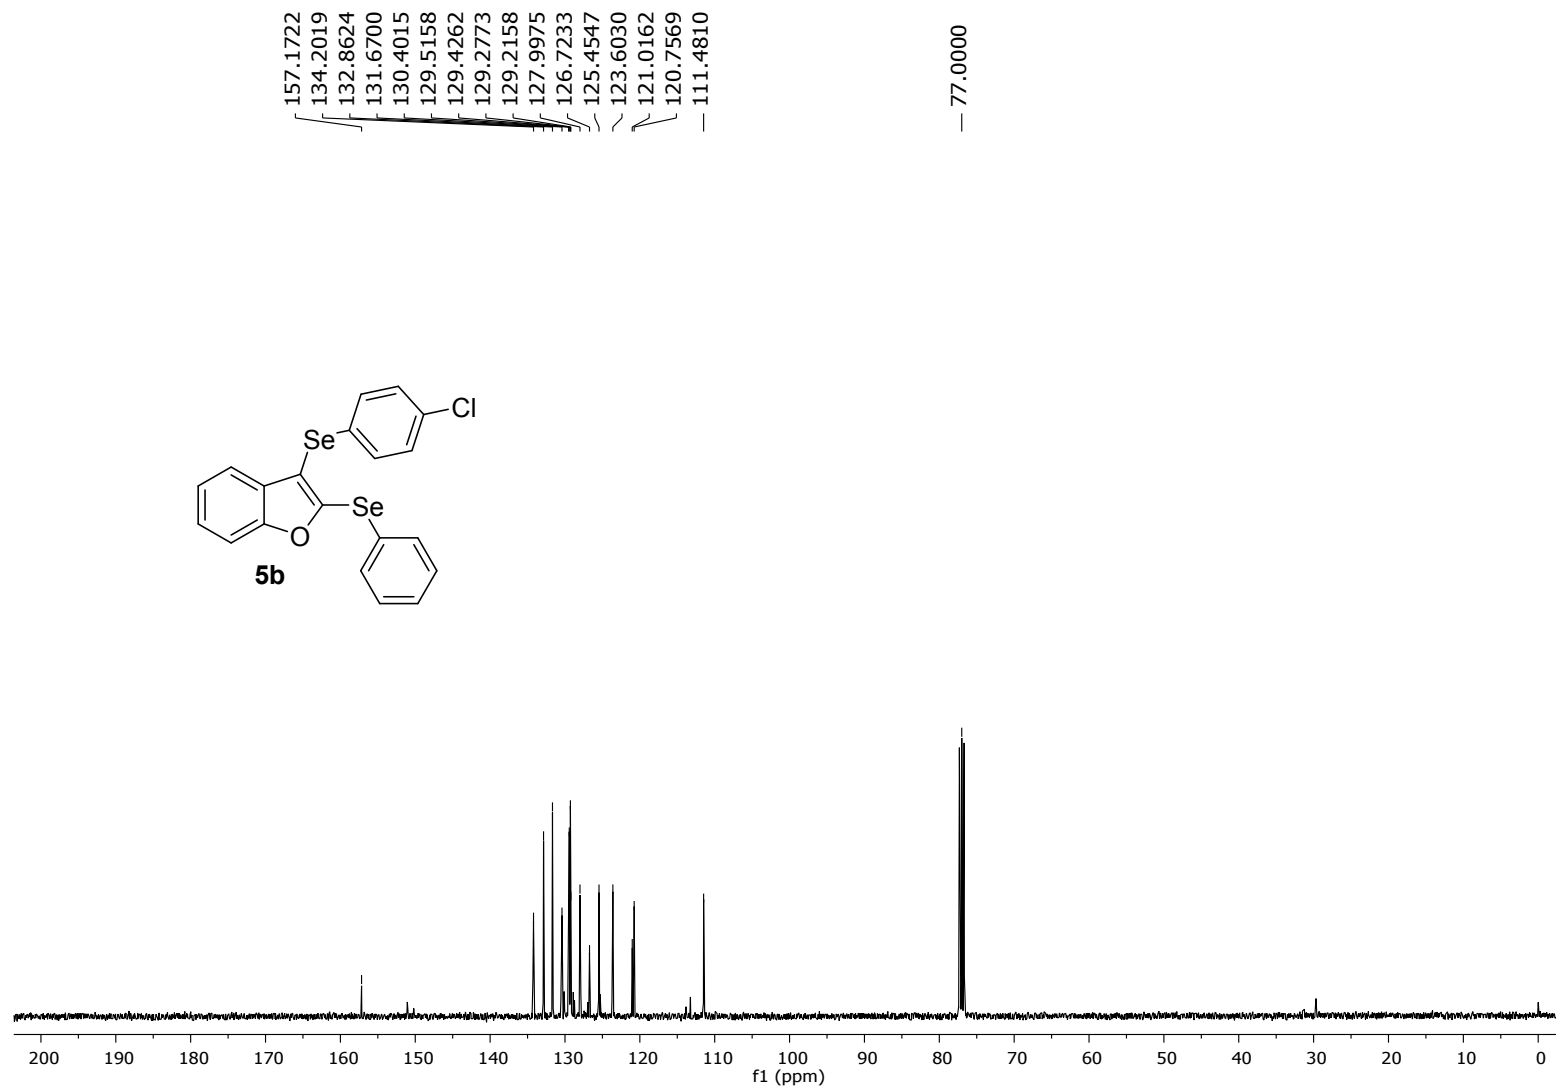

**Figure S26:** <sup>13</sup>C NMR (100 MHz, CDCl<sub>3</sub>) spectrum 3-[4-chlorophenyl]selanyl]-2-(phenylselanyl)benzo[*b*]furan **5b**.

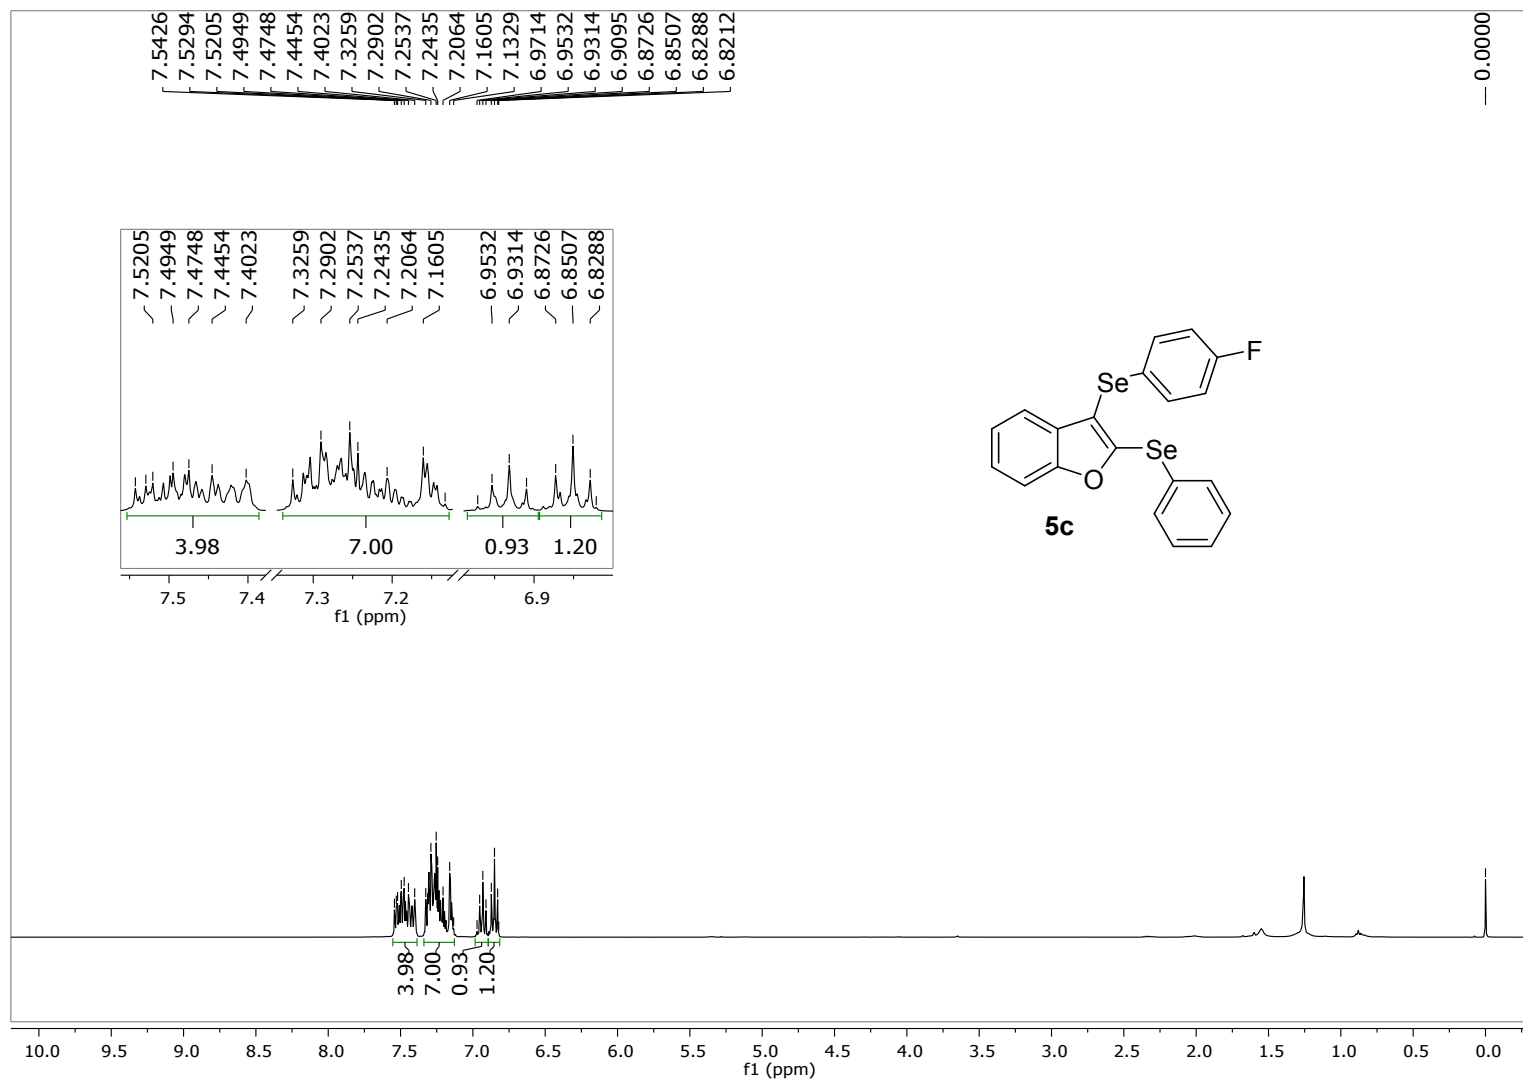

**Figure S27:**  $^1\text{H}$  NMR (400 MHz,  $\text{CDCl}_3$ ) spectrum 3-[(4-fluorophenyl)selanyl]-2-(phenylselanyl)benzo[*b*]furan **5c**.

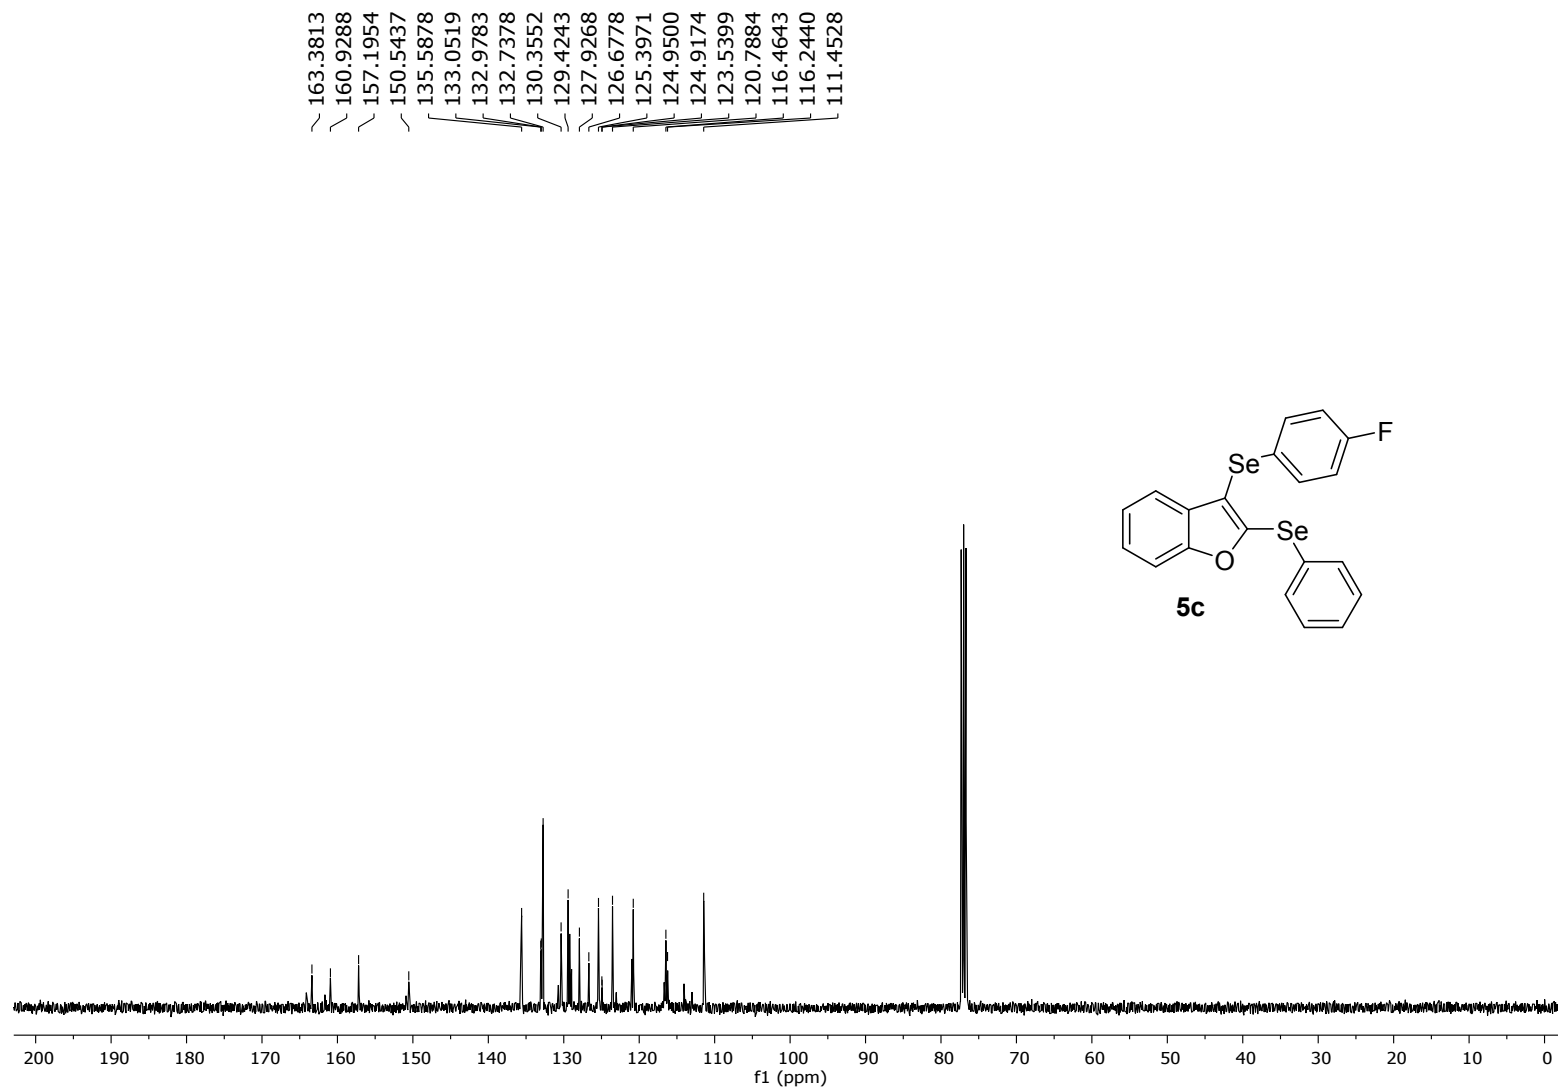

Figure S28: <sup>13</sup>C NMR (100 MHz, CDCl<sub>3</sub>) spectrum 3-[(4-fluorophenyl)selanyl]-2-(phenylselanyl)benzo[*b*]furan **5c**.

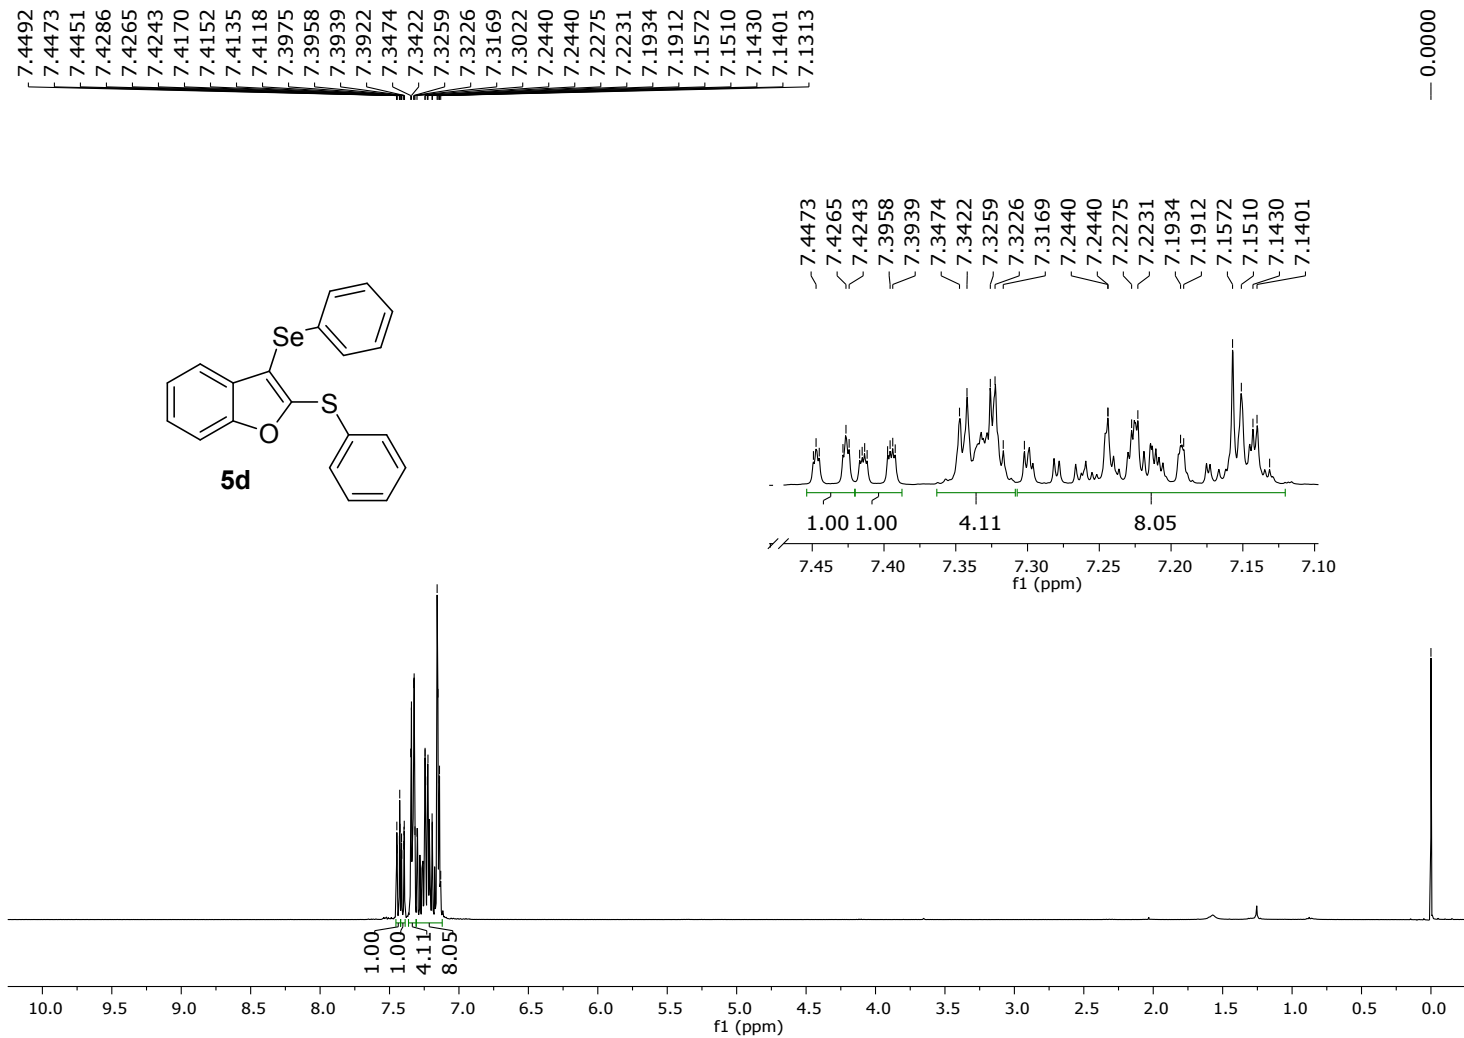

**Figure S29:**  $^1\text{H}$  NMR (400 MHz,  $\text{CDCl}_3$ ) spectrum 3-(phenylselanyl)-2-(phenylsulfanyl)benzo[*b*]furan **5d**.

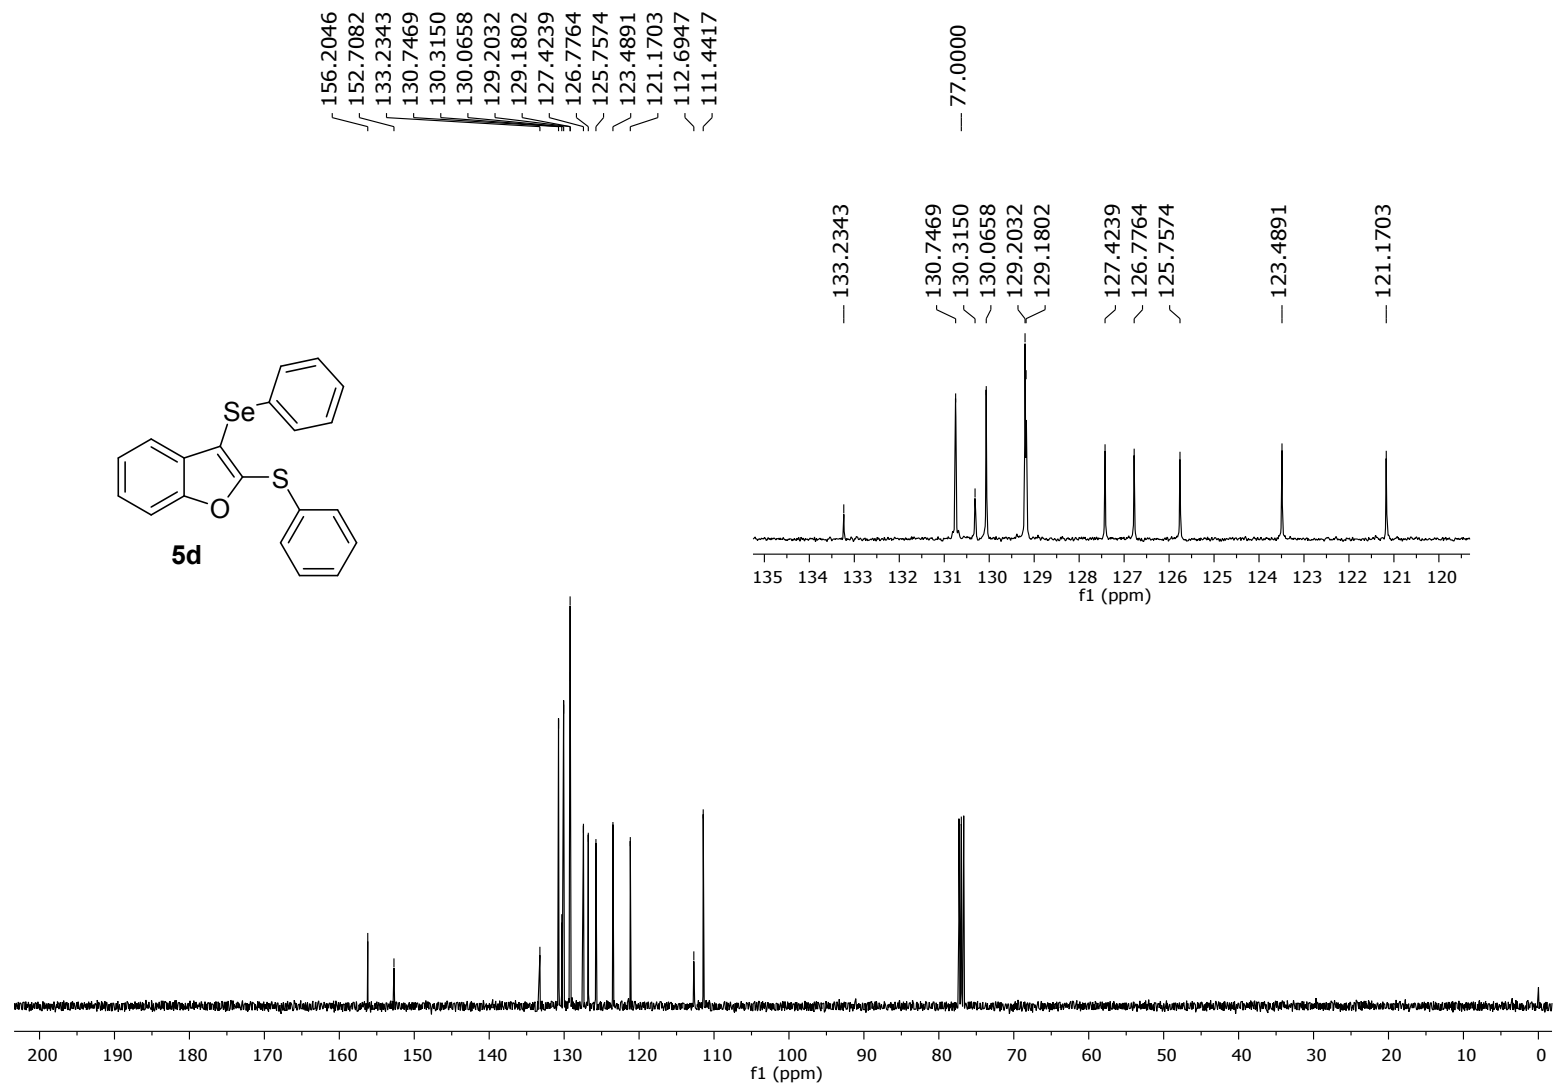

**Figure S30:** <sup>13</sup>C NMR (100 MHz, CDCl<sub>3</sub>) spectrum 3-(phenylselanyl)-2-(phenylsulfanyl)benzo[*b*]furan **5d**.

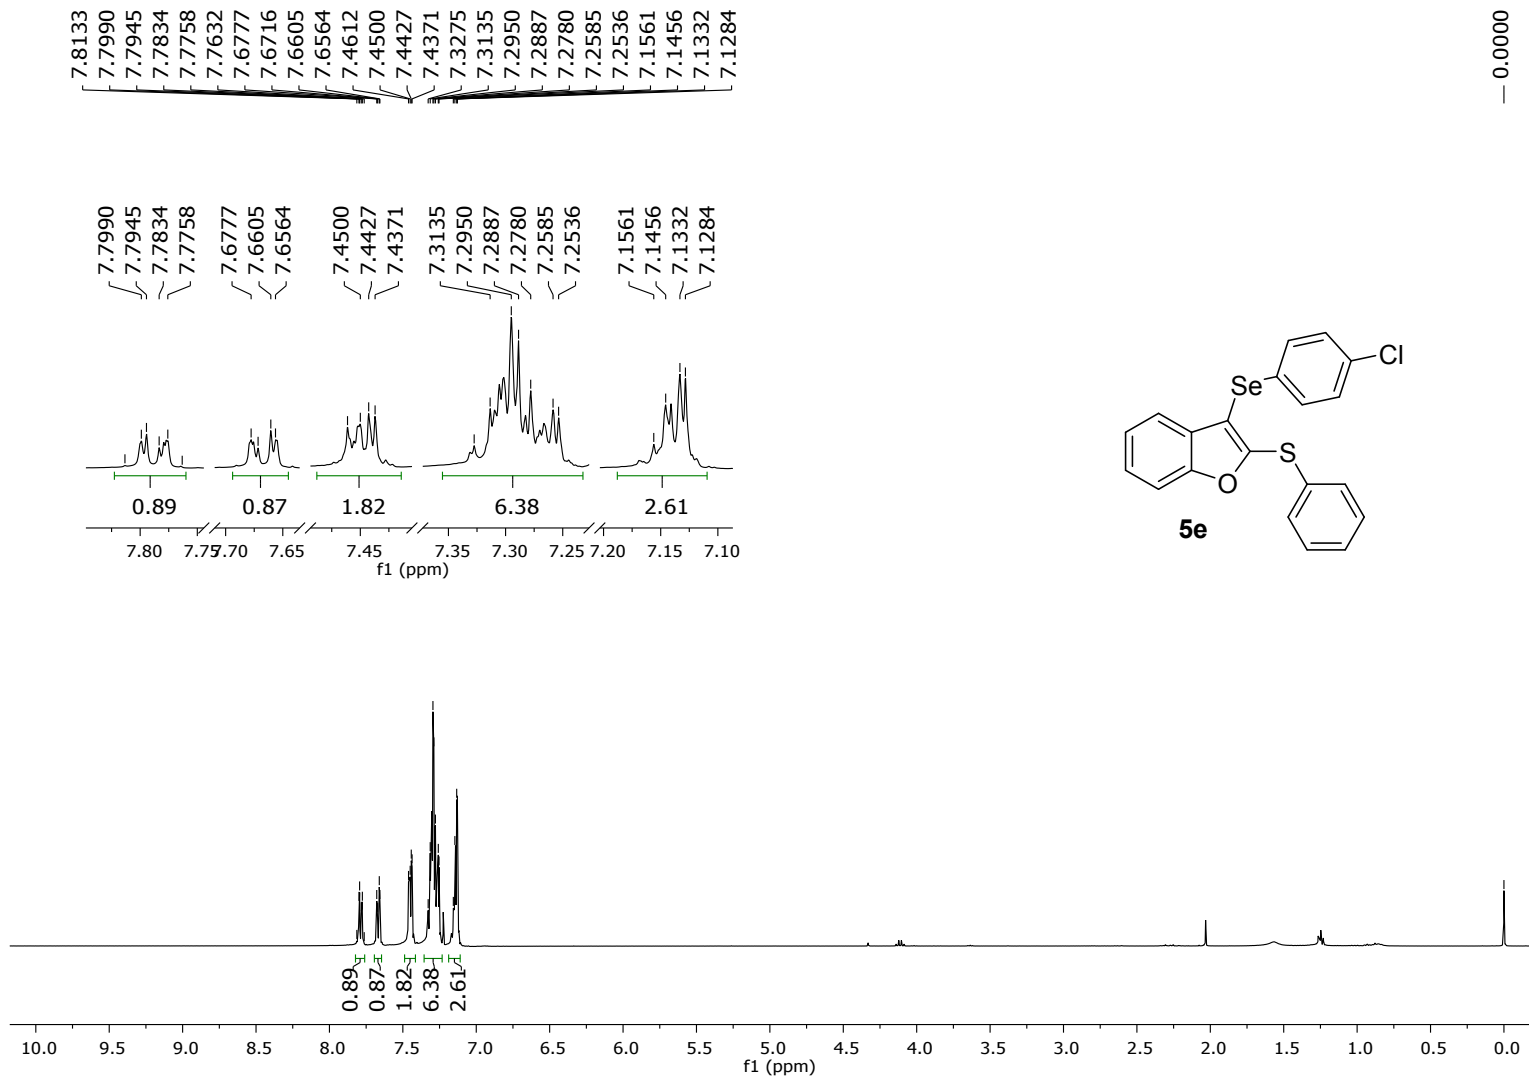

**Figure S31:** <sup>1</sup>H NMR (400 MHz, CDCl<sub>3</sub>) spectrum 3-[(4-chlorophenyl)selanyl]-2-(phenylsulfanyl)benzo[*b*]furan **5e**.



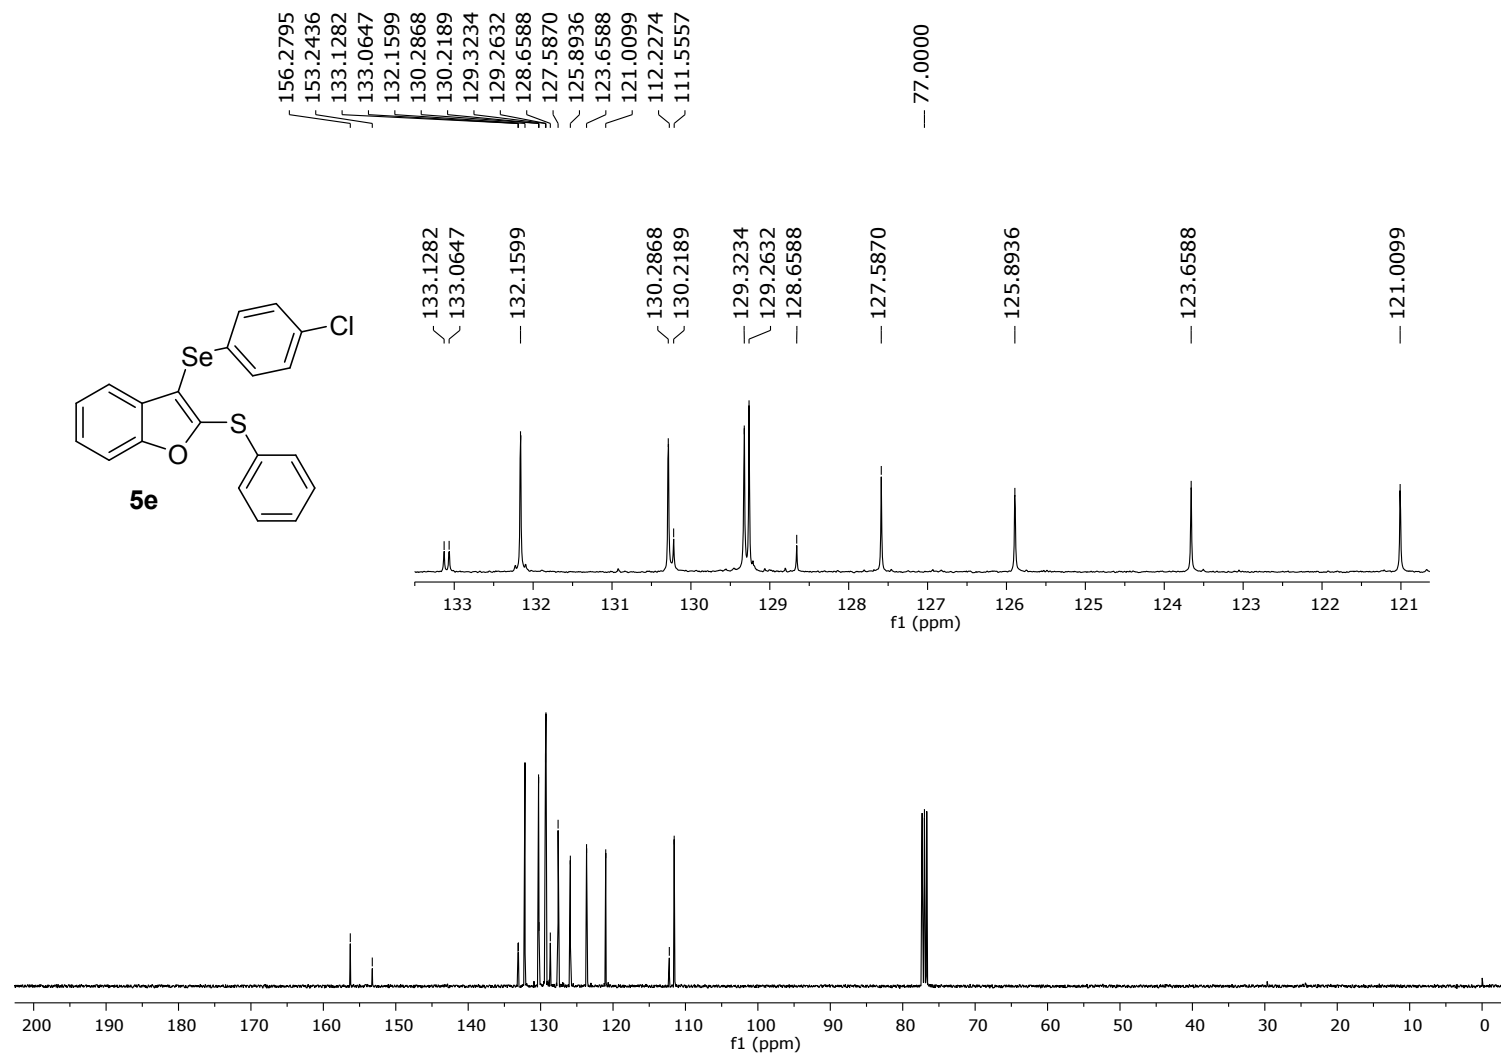

**Figure S32:** <sup>13</sup>C NMR (100 MHz, CDCl<sub>3</sub>) spectrum 3-[(4-chlorophenyl)selanyl]-2-(phenylsulfanyl)benzo[*b*]furan **5e**.

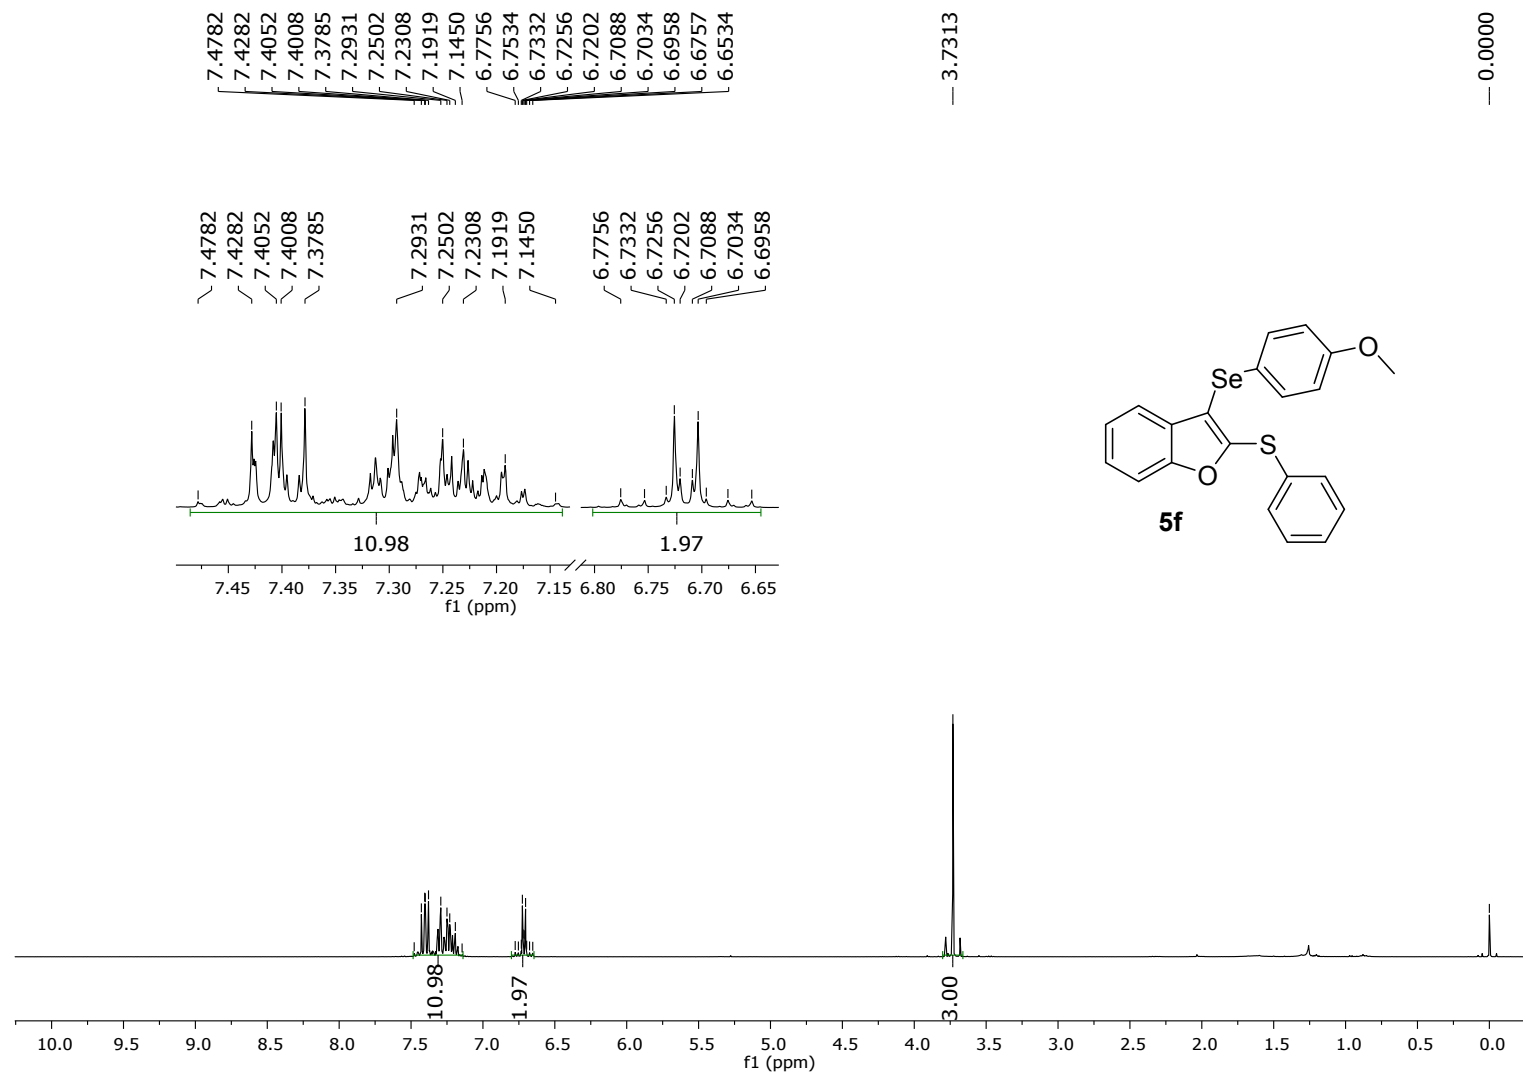

**Figure S33:**  $^1\text{H}$  NMR (400 MHz,  $\text{CDCl}_3$ ) spectrum 3-[(4-methoxyphenyl)selanyl]-2-(phenylsulfanyl)benzo[*b*]furan **5f**.

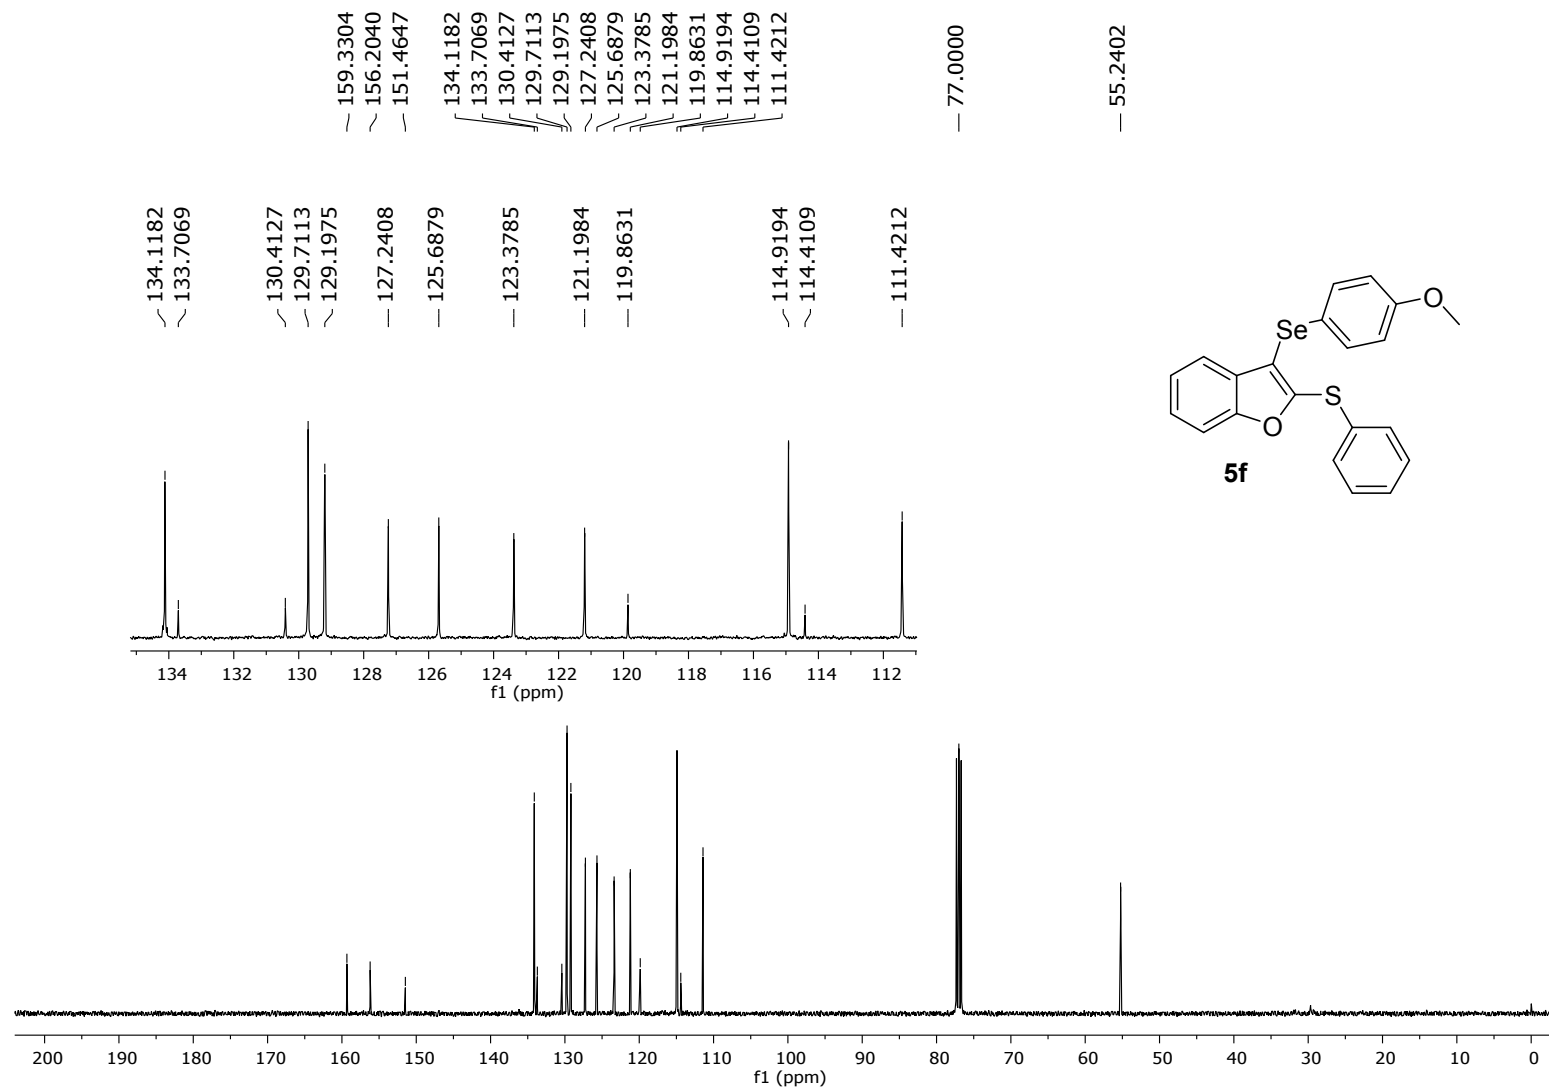

**Figure S34:** <sup>13</sup>C NMR (100 MHz, CDCl<sub>3</sub>) spectrum 3-[(4-methoxyphenyl)selenyl]-2-(phenylsulfanyl)benzo[*b*]furan **5f**.

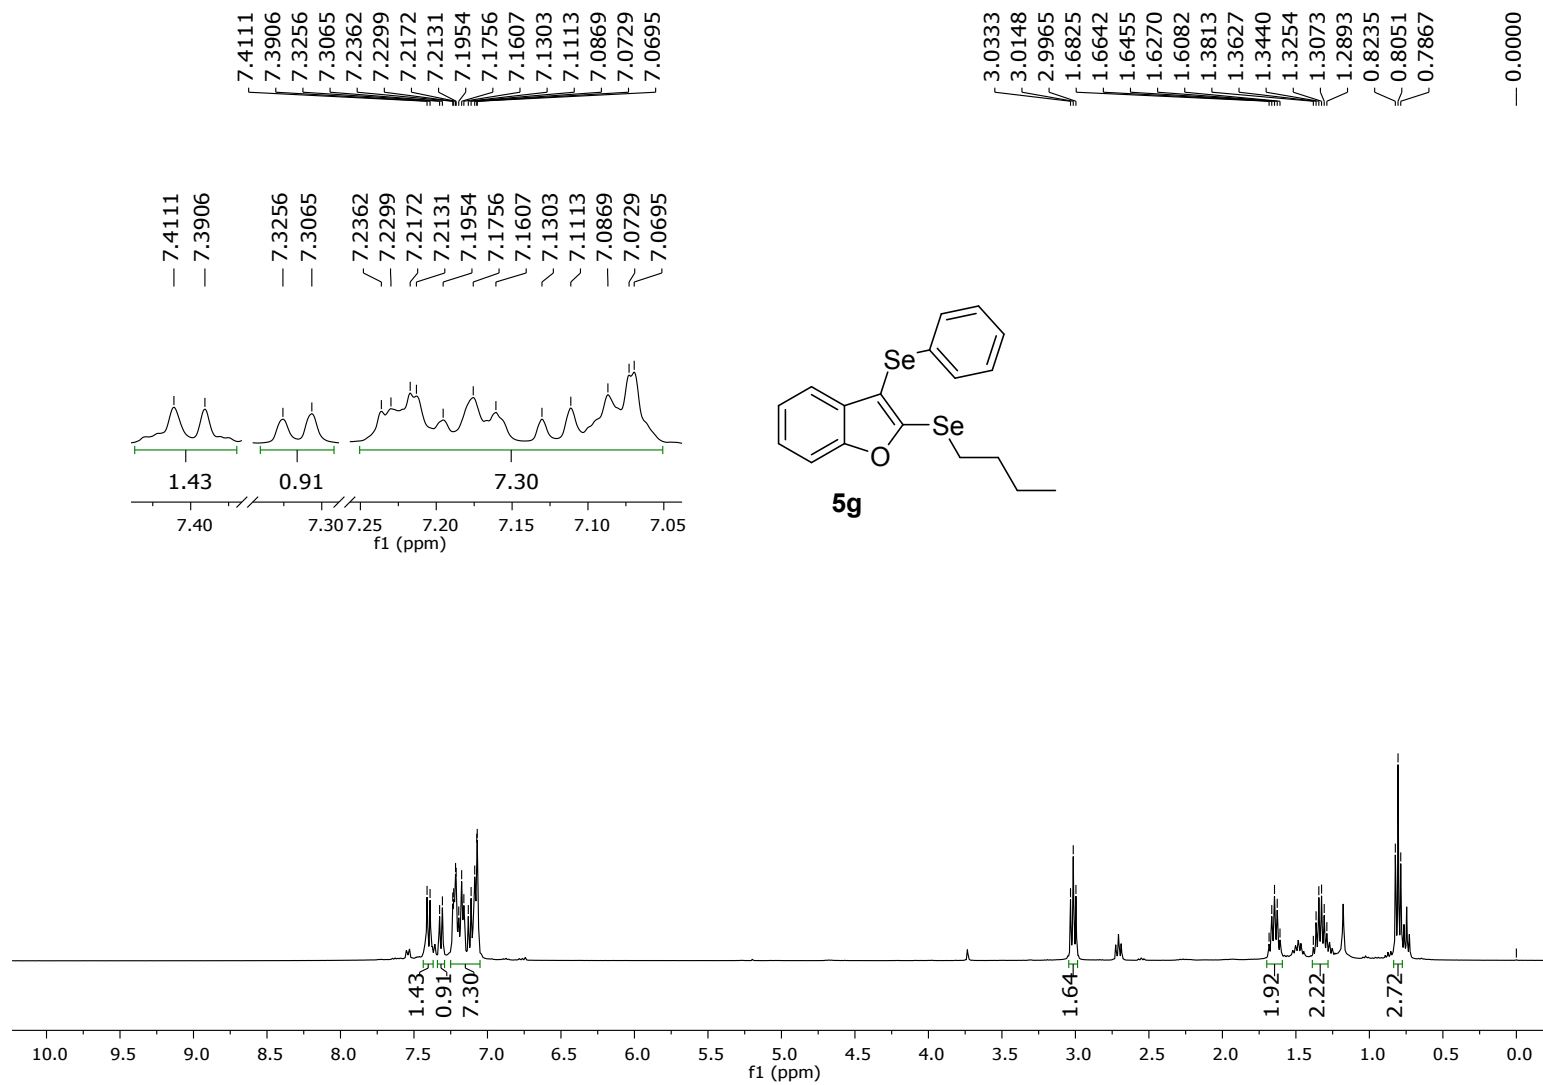

**Figure S35:** <sup>1</sup>H NMR (400 MHz, CDCl<sub>3</sub>) spectrum 2-(butylselanyl)-3-(phenylselanyl)benzo[*b*]furan **5g**.

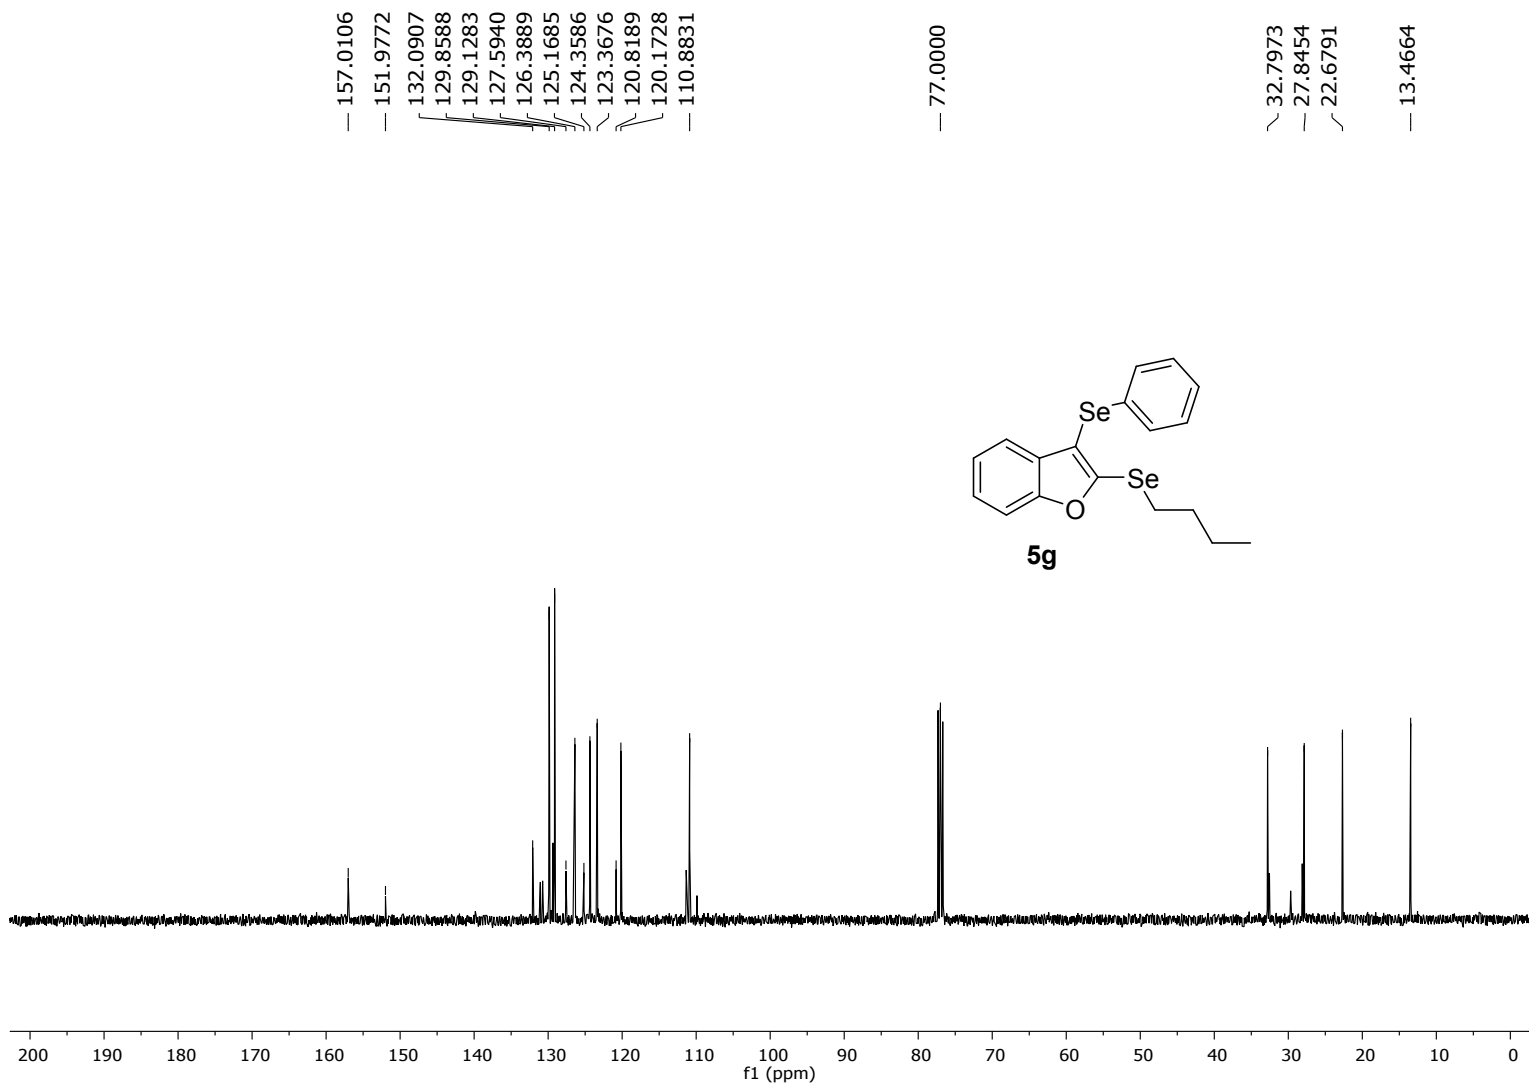

Figure S36: <sup>13</sup>C NMR (100 MHz, CDCl<sub>3</sub>) spectrum 2-(butylselanyl)-3-(phenylselanyl)benzo[*b*]furan **5g**.

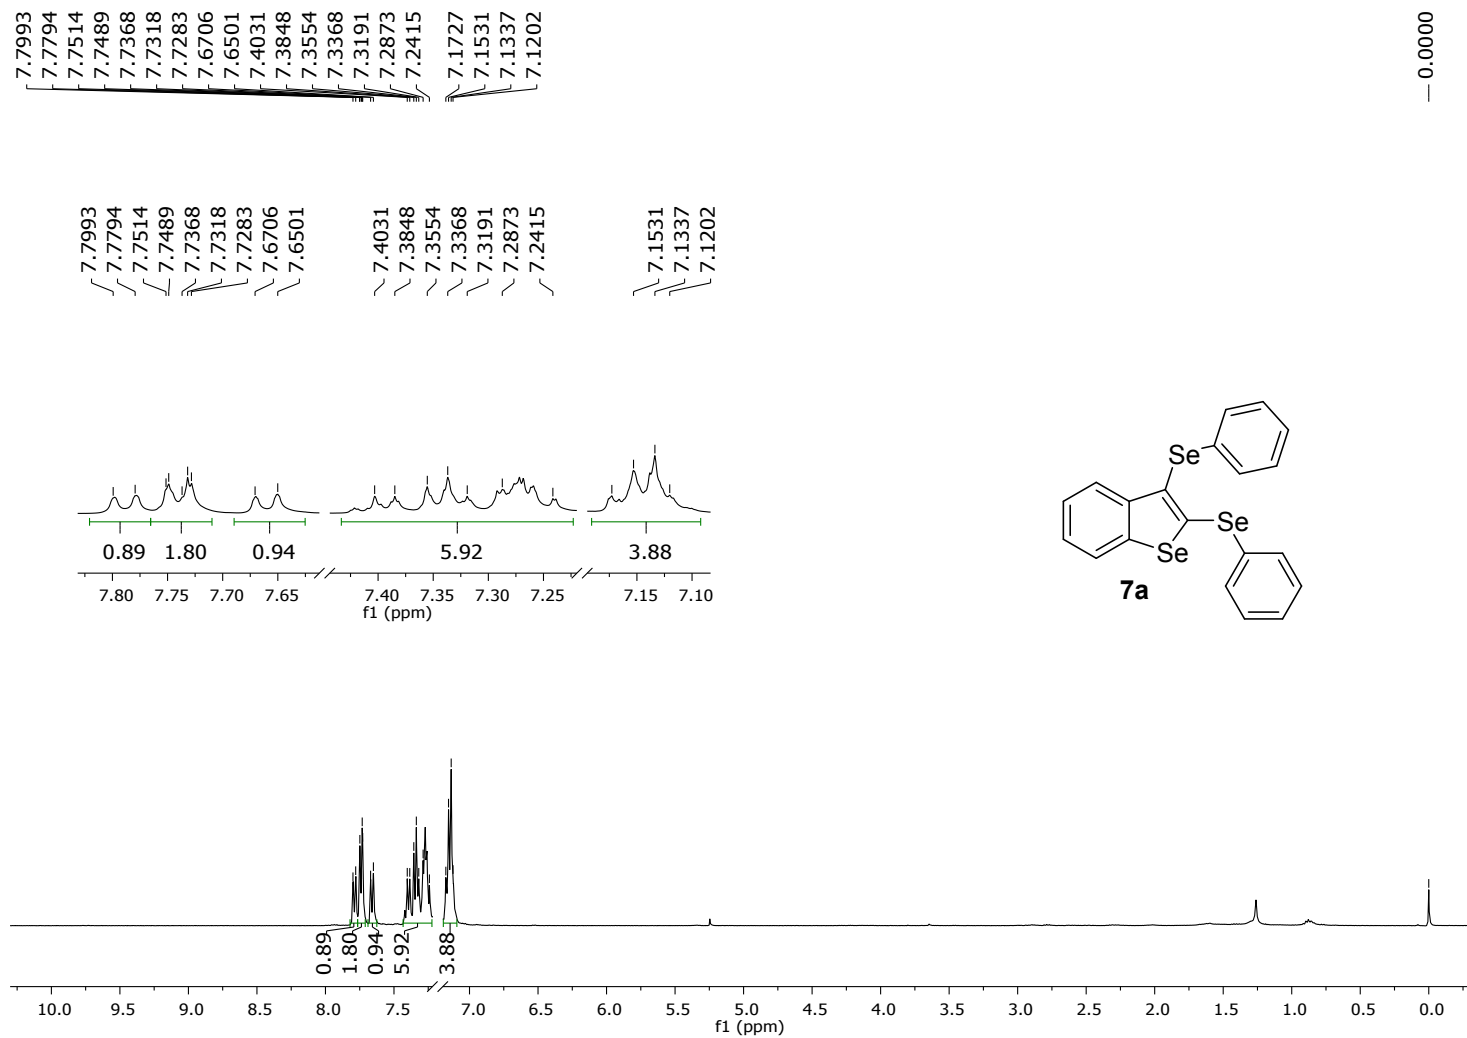

**Figure S37:** <sup>1</sup>H NMR (400 MHz, CDCl<sub>3</sub>) spectrum 2,3-bis(phenylselanyl)benzo[*b*]selenophene **7a**.

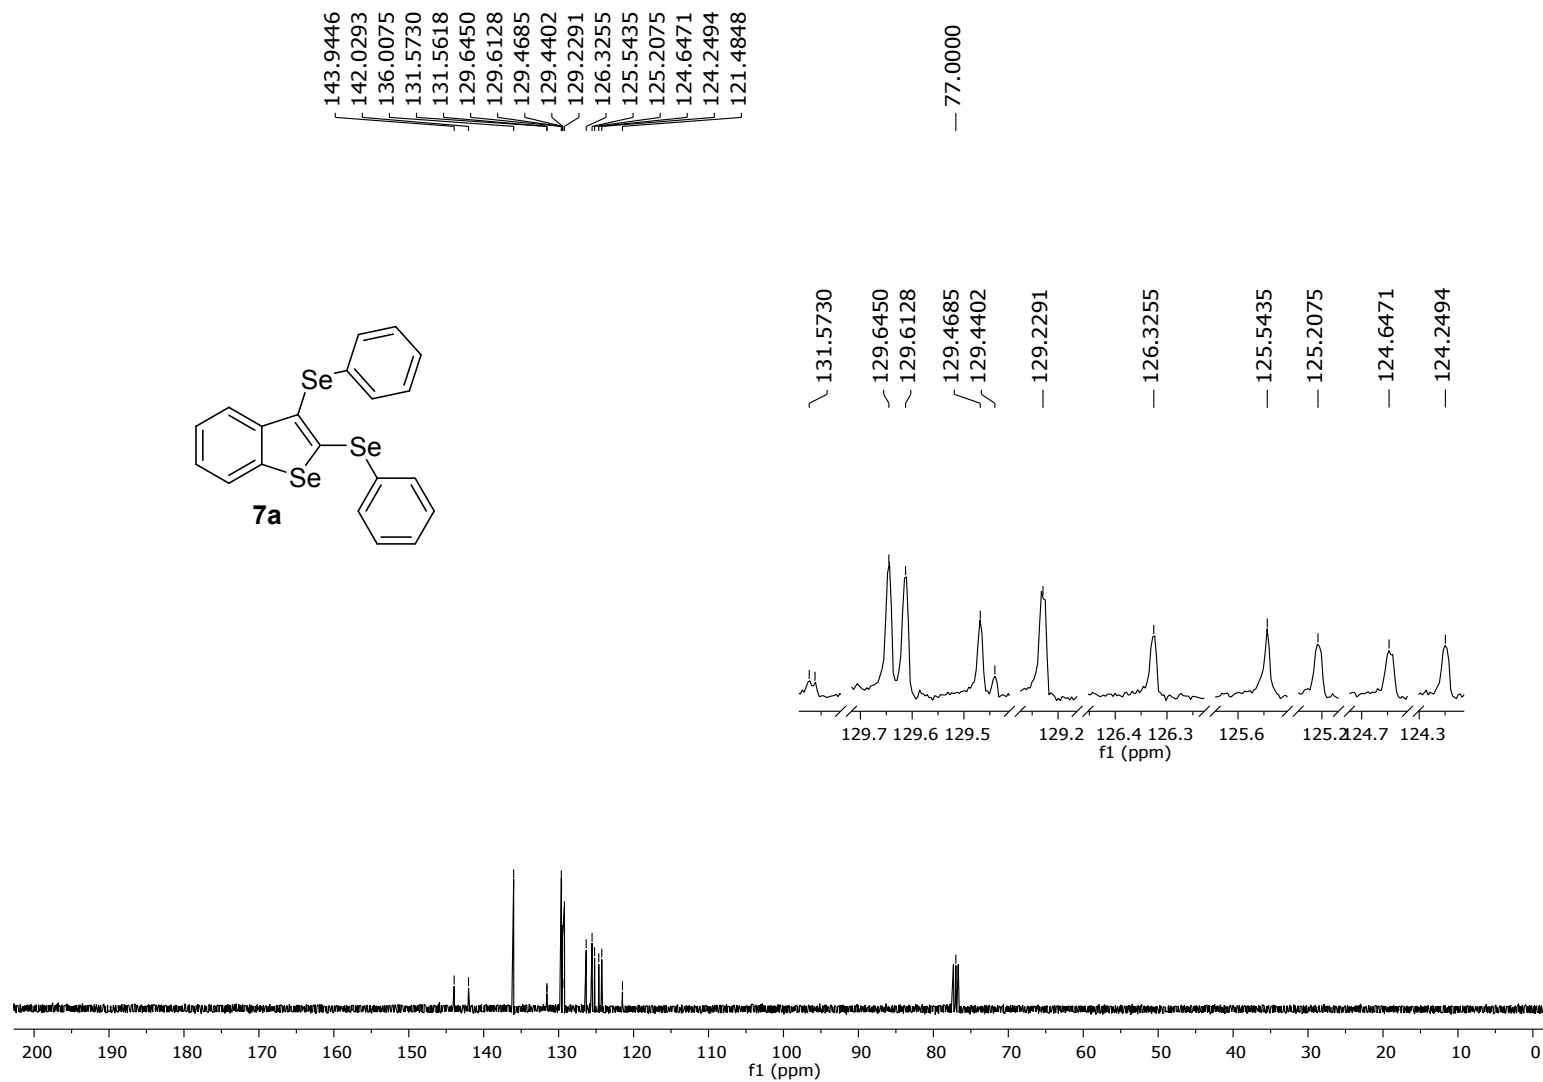

Figure S38:  $^{13}\text{C}$  NMR (100 MHz,  $\text{CDCl}_3$ ) spectrum 2,3-bis(phenylselanyl)benzo[*b*]selenophene **7a**.

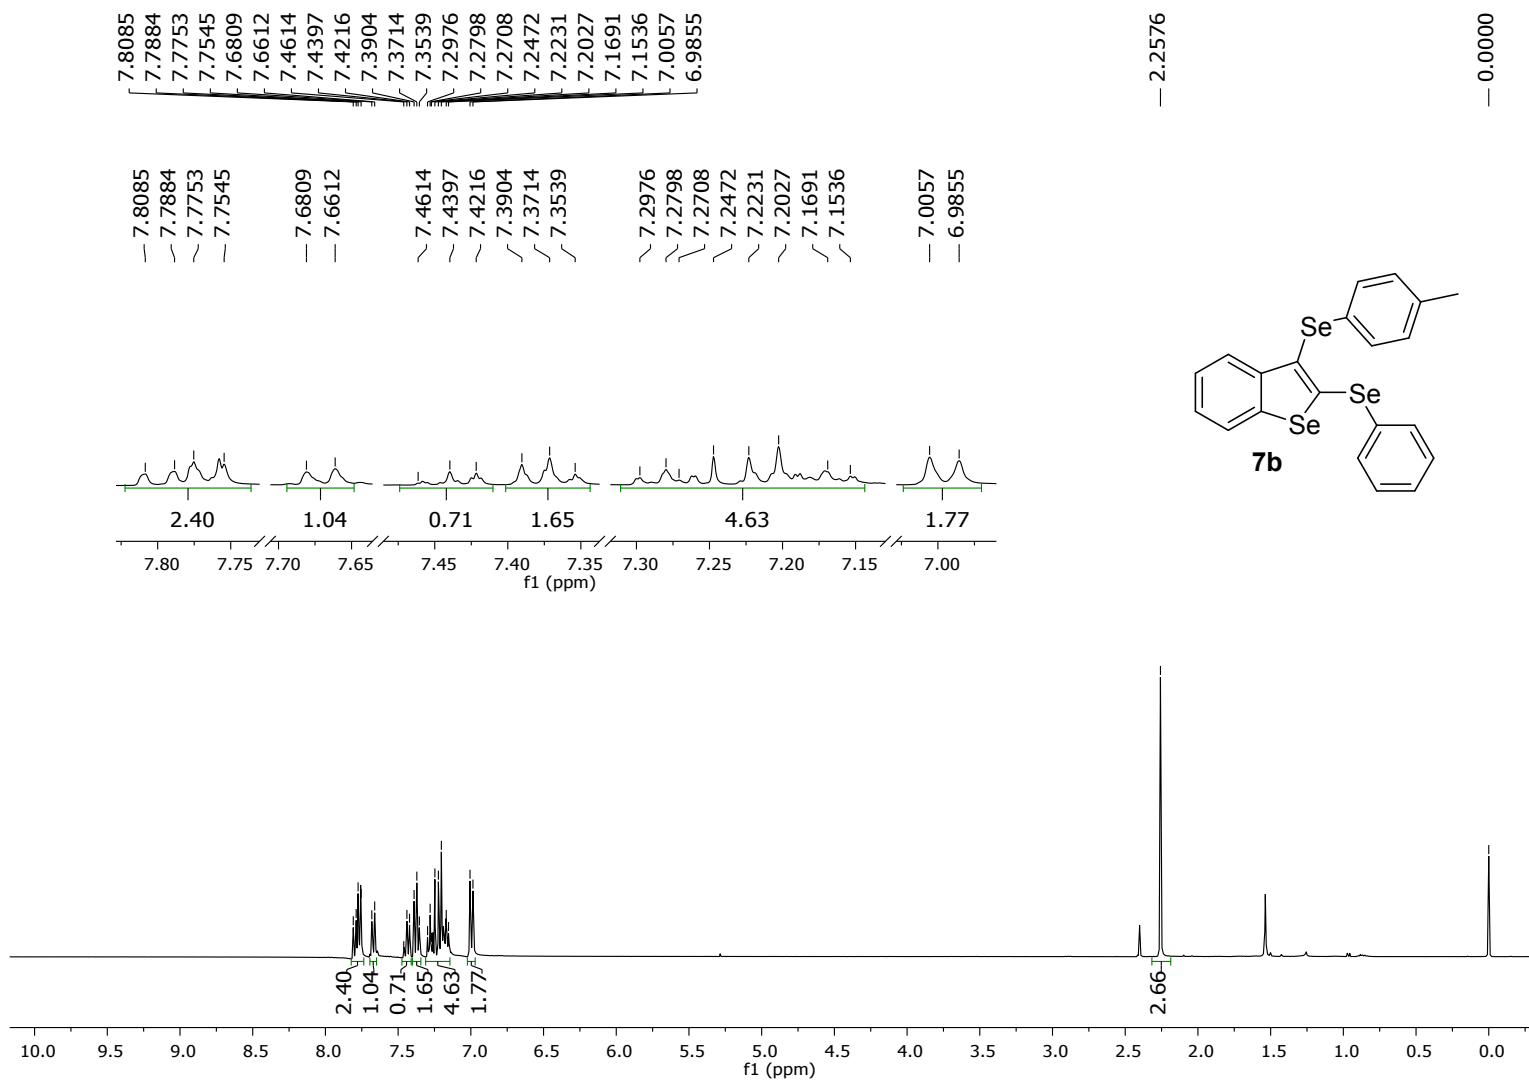

**Figure S39:**  $^1\text{H}$  NMR (400 MHz,  $\text{CDCl}_3$ ) spectrum 2-(phenylselanyl)-3-(4-tolylselanyl)benzo[*b*]selenophene **7b**.



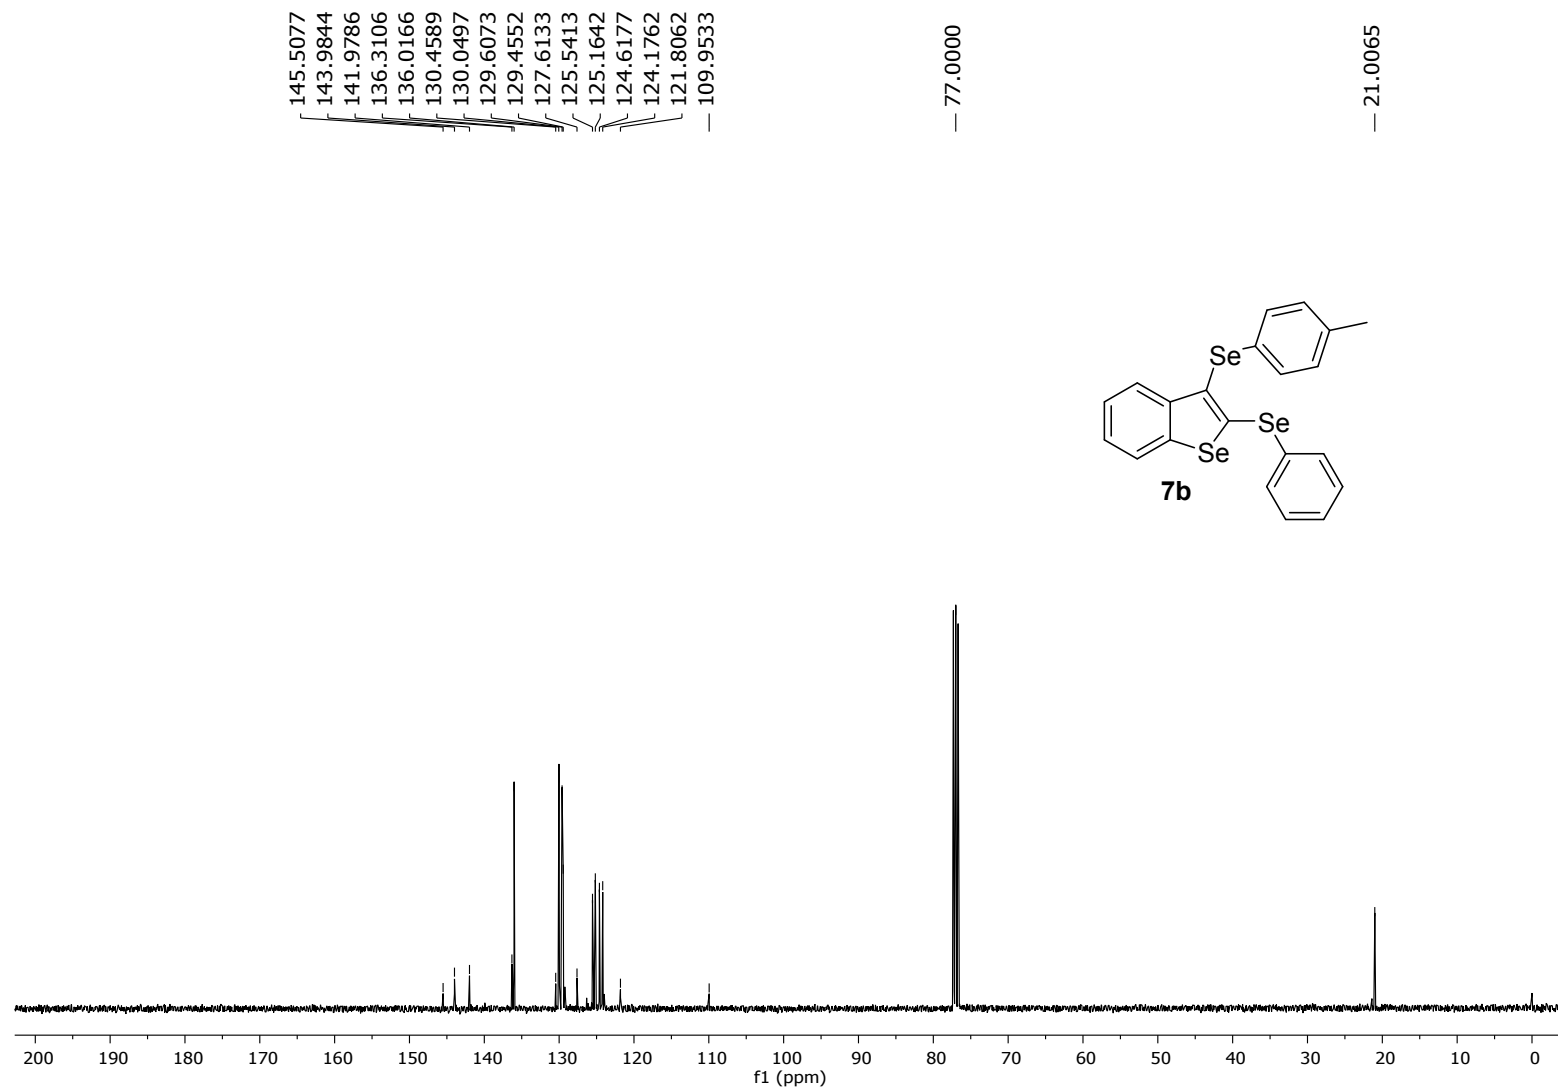

**Figure S40:**  $^{13}\text{C}$  NMR (100 MHz,  $\text{CDCl}_3$ ) spectrum 2-(phenylselanyl)-3-(4-tolylselanyl)benzo[*b*]selenophene **7b**.

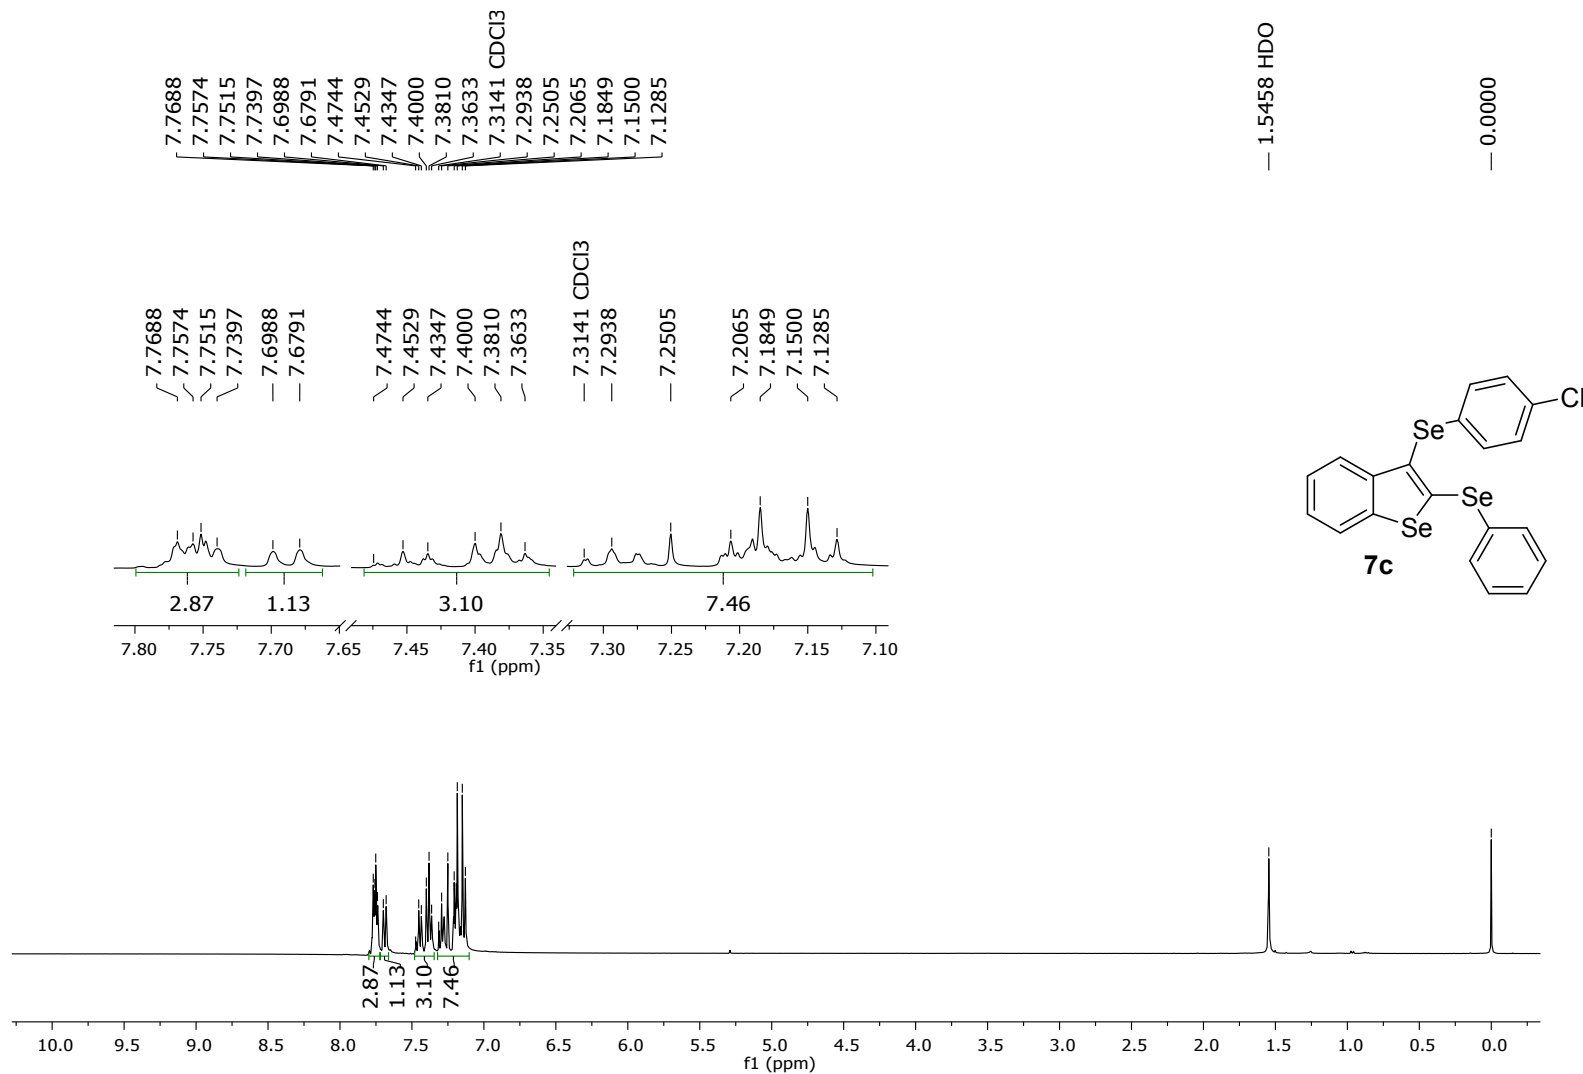

**Figure S41:** <sup>1</sup>H NMR (400 MHz, CDCl<sub>3</sub>) spectrum 3-[(4-chlorophenyl)selanyl]-2-(phenylselanyl)benzo[*b*]selenophene **7c**.

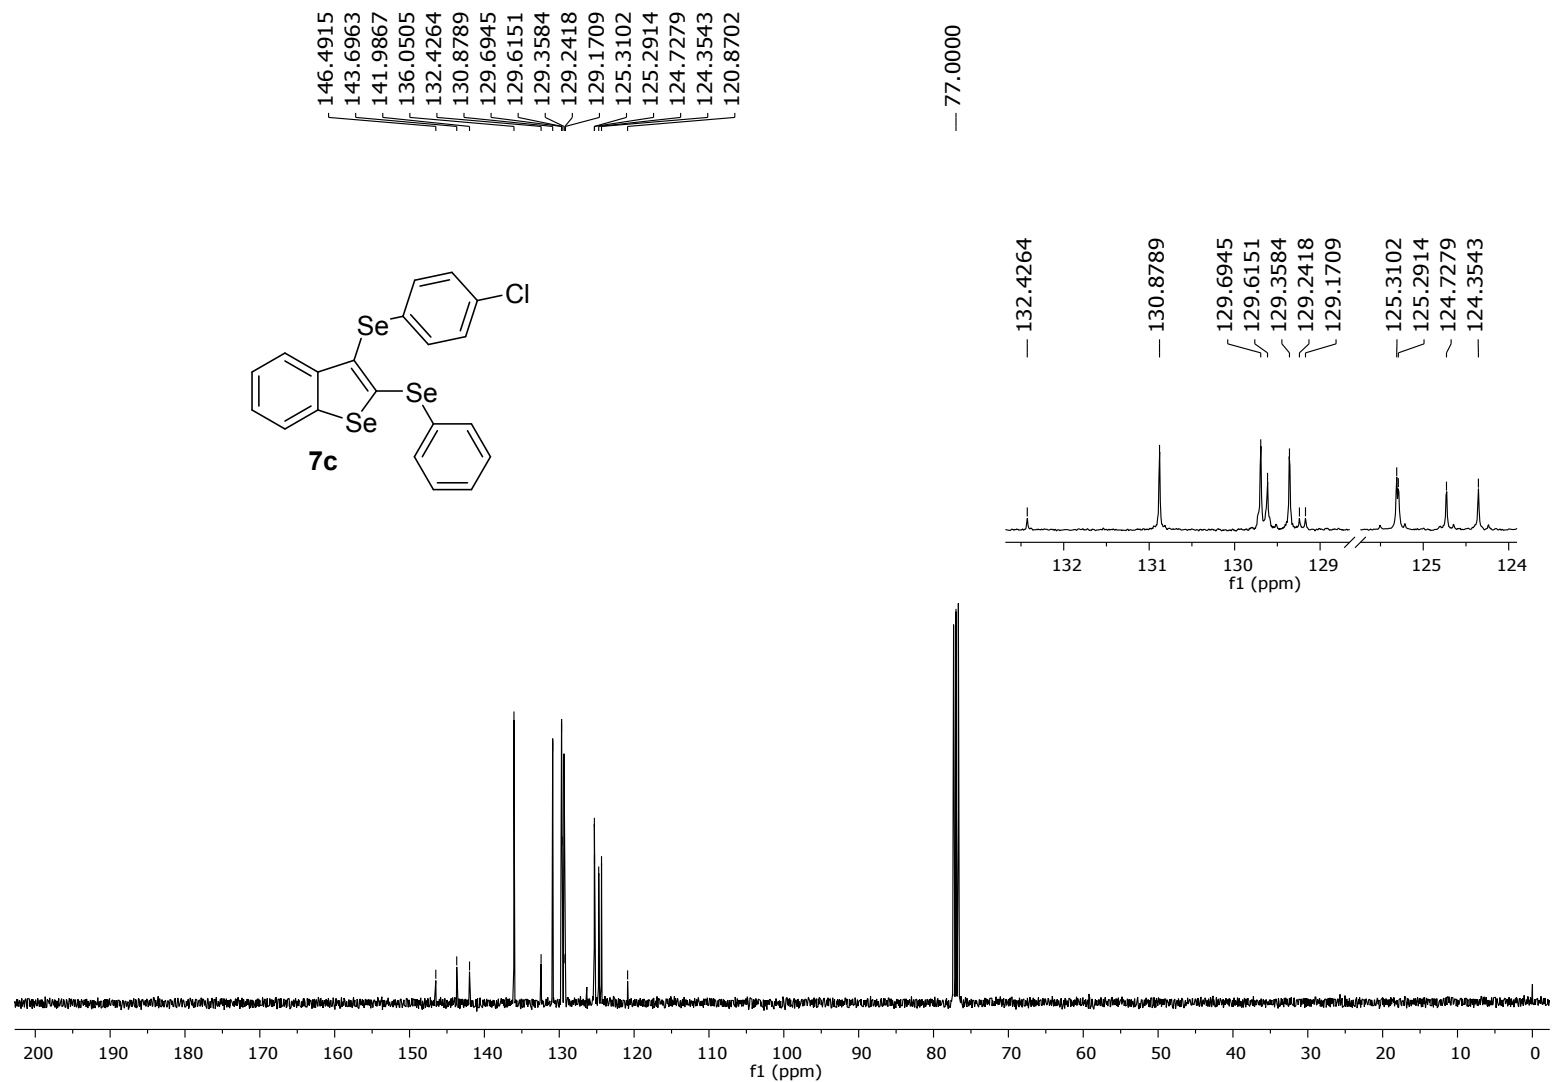

**Figure S42:** <sup>13</sup>C NMR (100 MHz, CDCl<sub>3</sub>) spectrum 3-[(4-chlorophenyl)selanyl]-2-(phenylselanyl)benzo[*b*]selenophene **7c**.

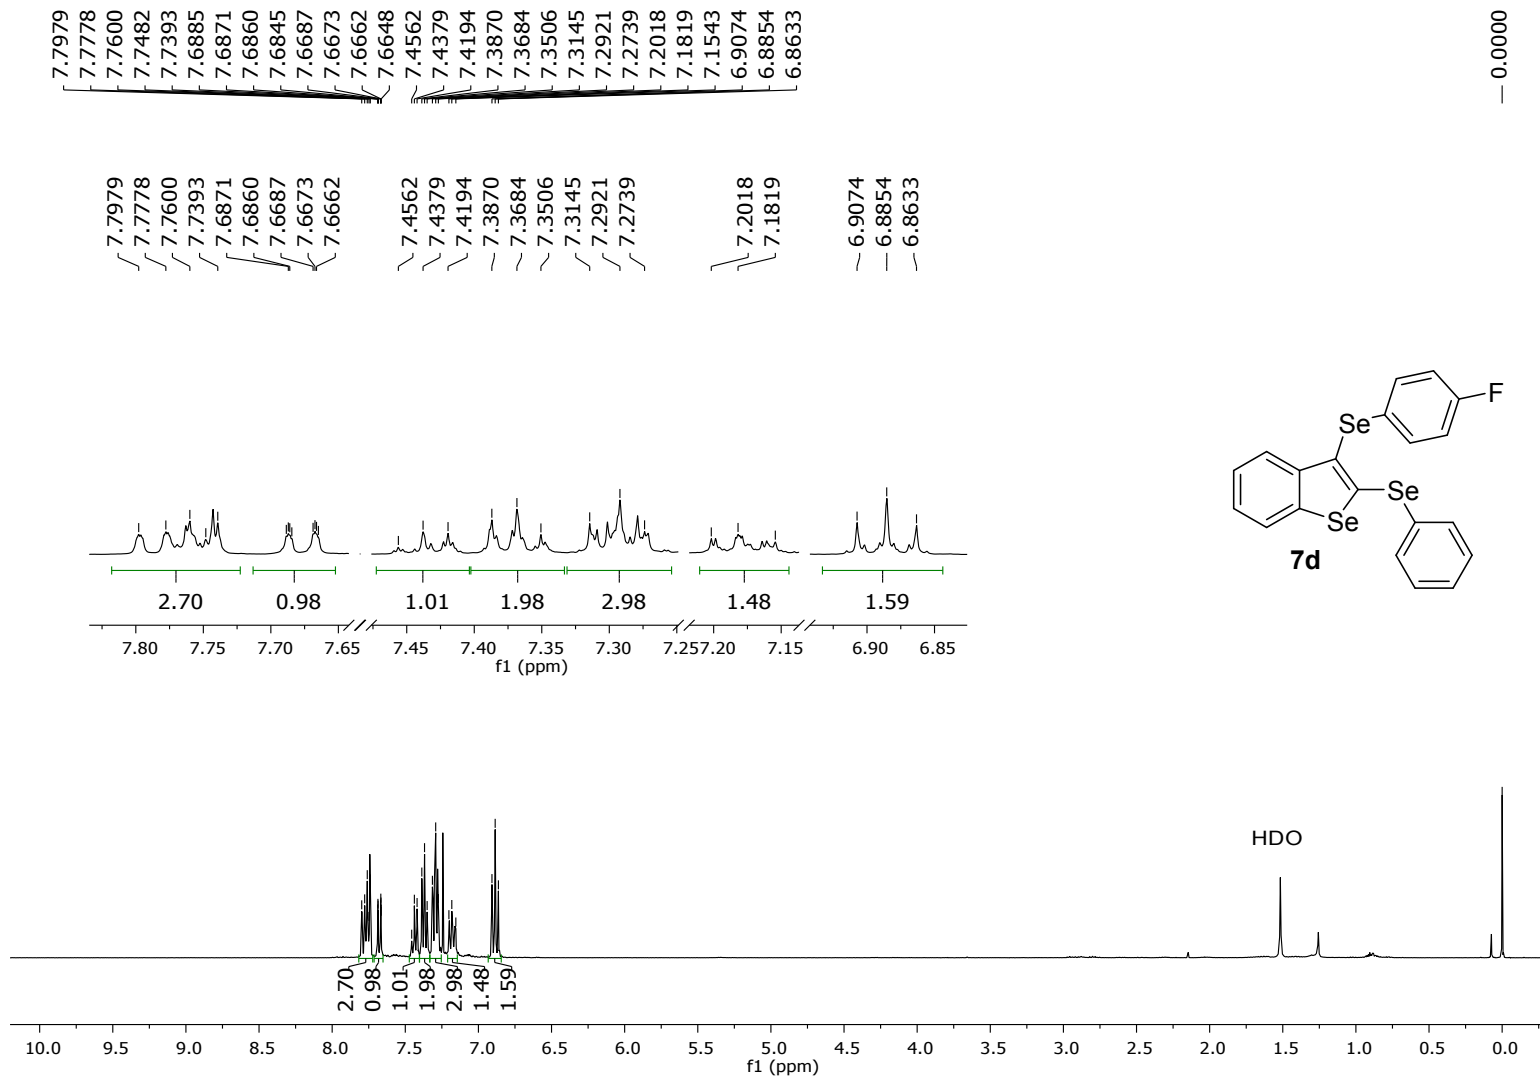

**Figure S43:** <sup>1</sup>H NMR (400 MHz, CDCl<sub>3</sub>) spectrum 3-[(4-fluorophenyl)selanyl]-2-(phenylselanyl)benzo[*b*]selenophene **7d**.

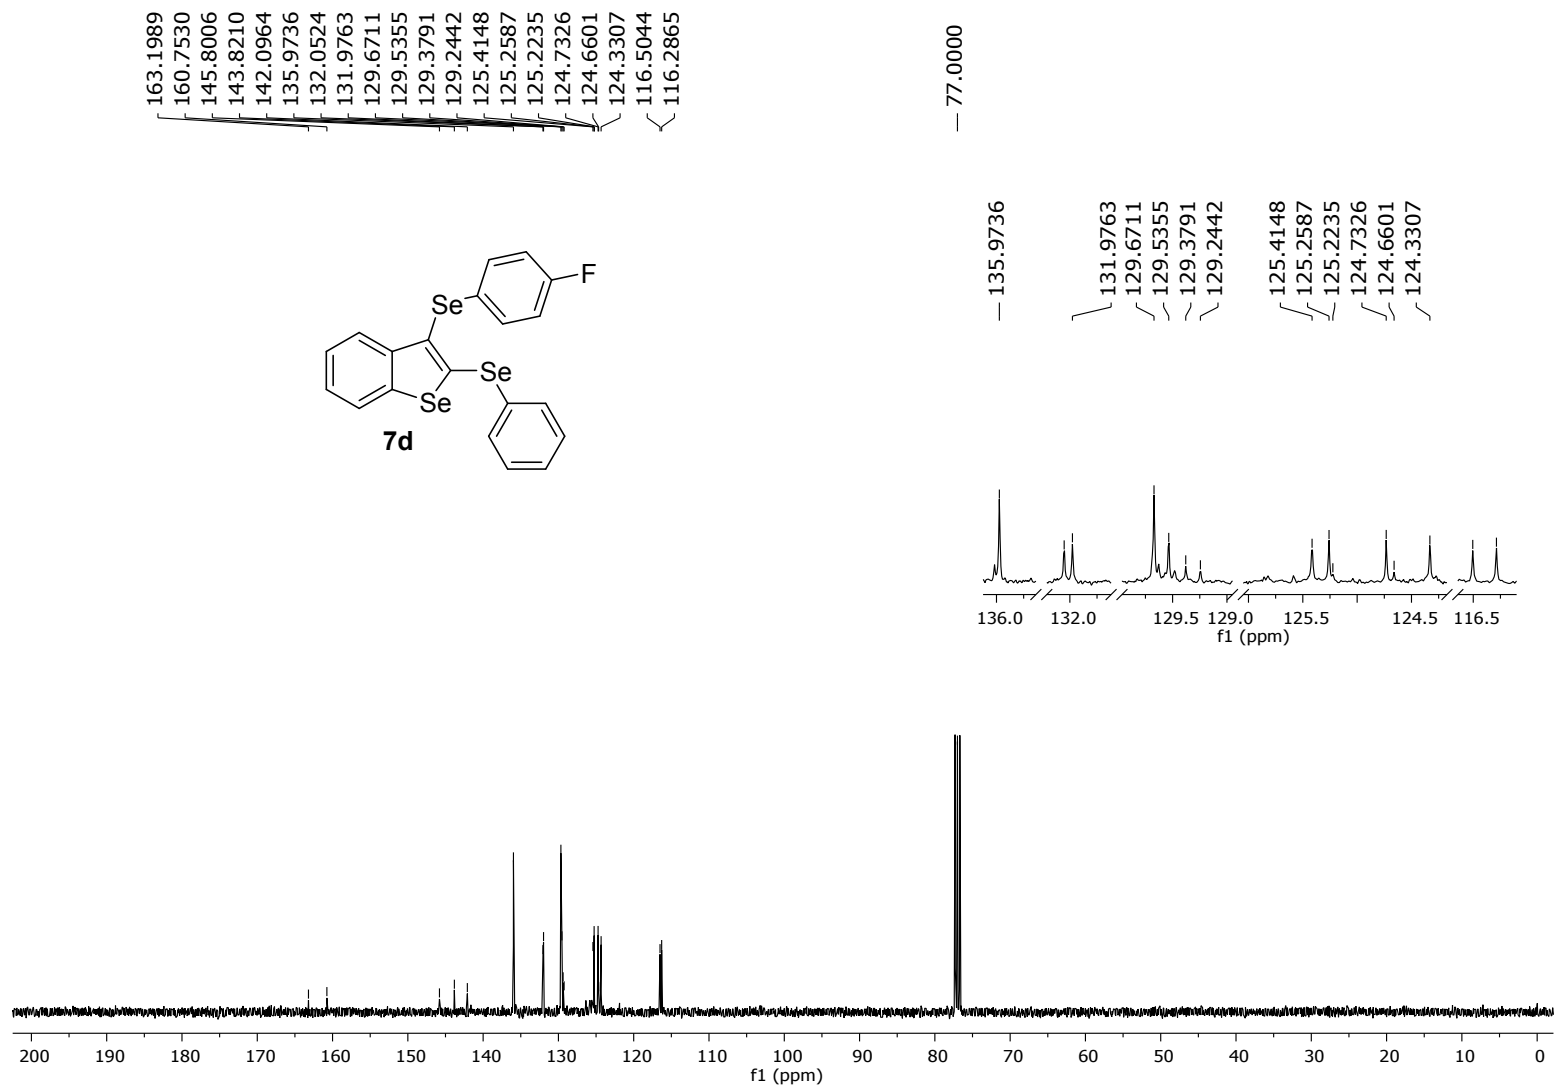

**Figure S44:** <sup>13</sup>C NMR (100 MHz, CDCl<sub>3</sub>) spectrum 3-[(4-fluorophenyl)selanyl]-2-(phenylselanyl)benzo[*b*]selenophene **7d**.

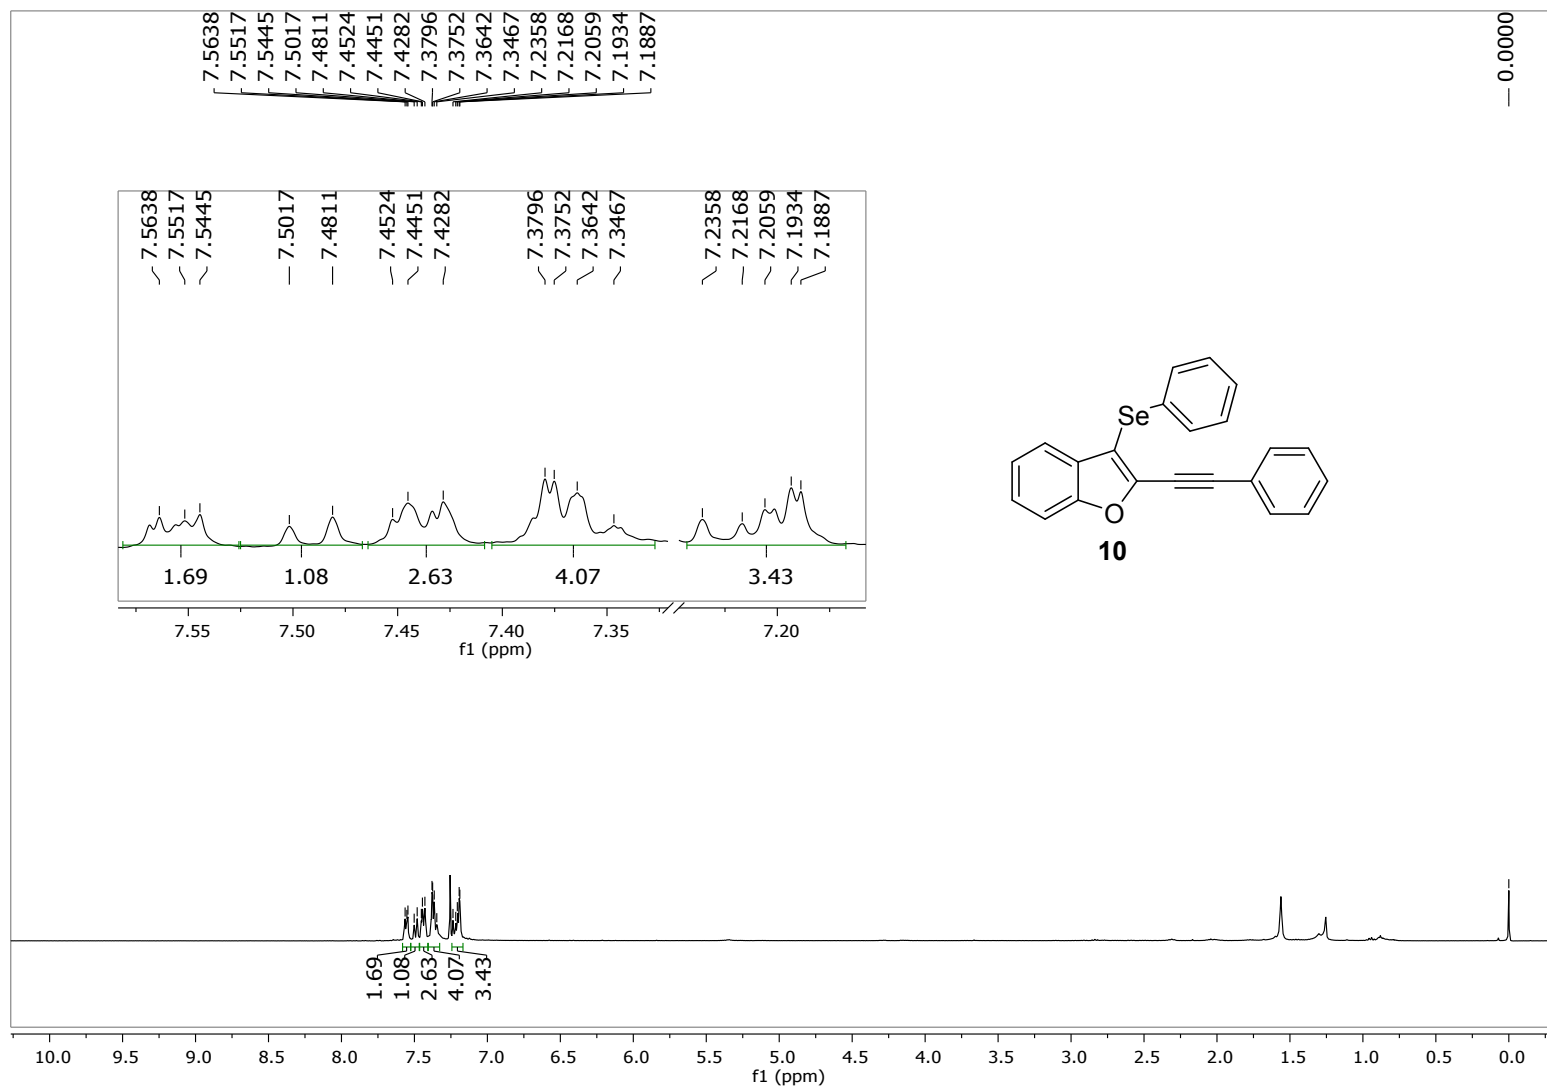

**Figure S45:** <sup>1</sup>H NMR (400 MHz, CDCl<sub>3</sub>) spectrum 2-(phenylethynyl)-3-(phenylselanyl)benzo[*b*]furan **10**.

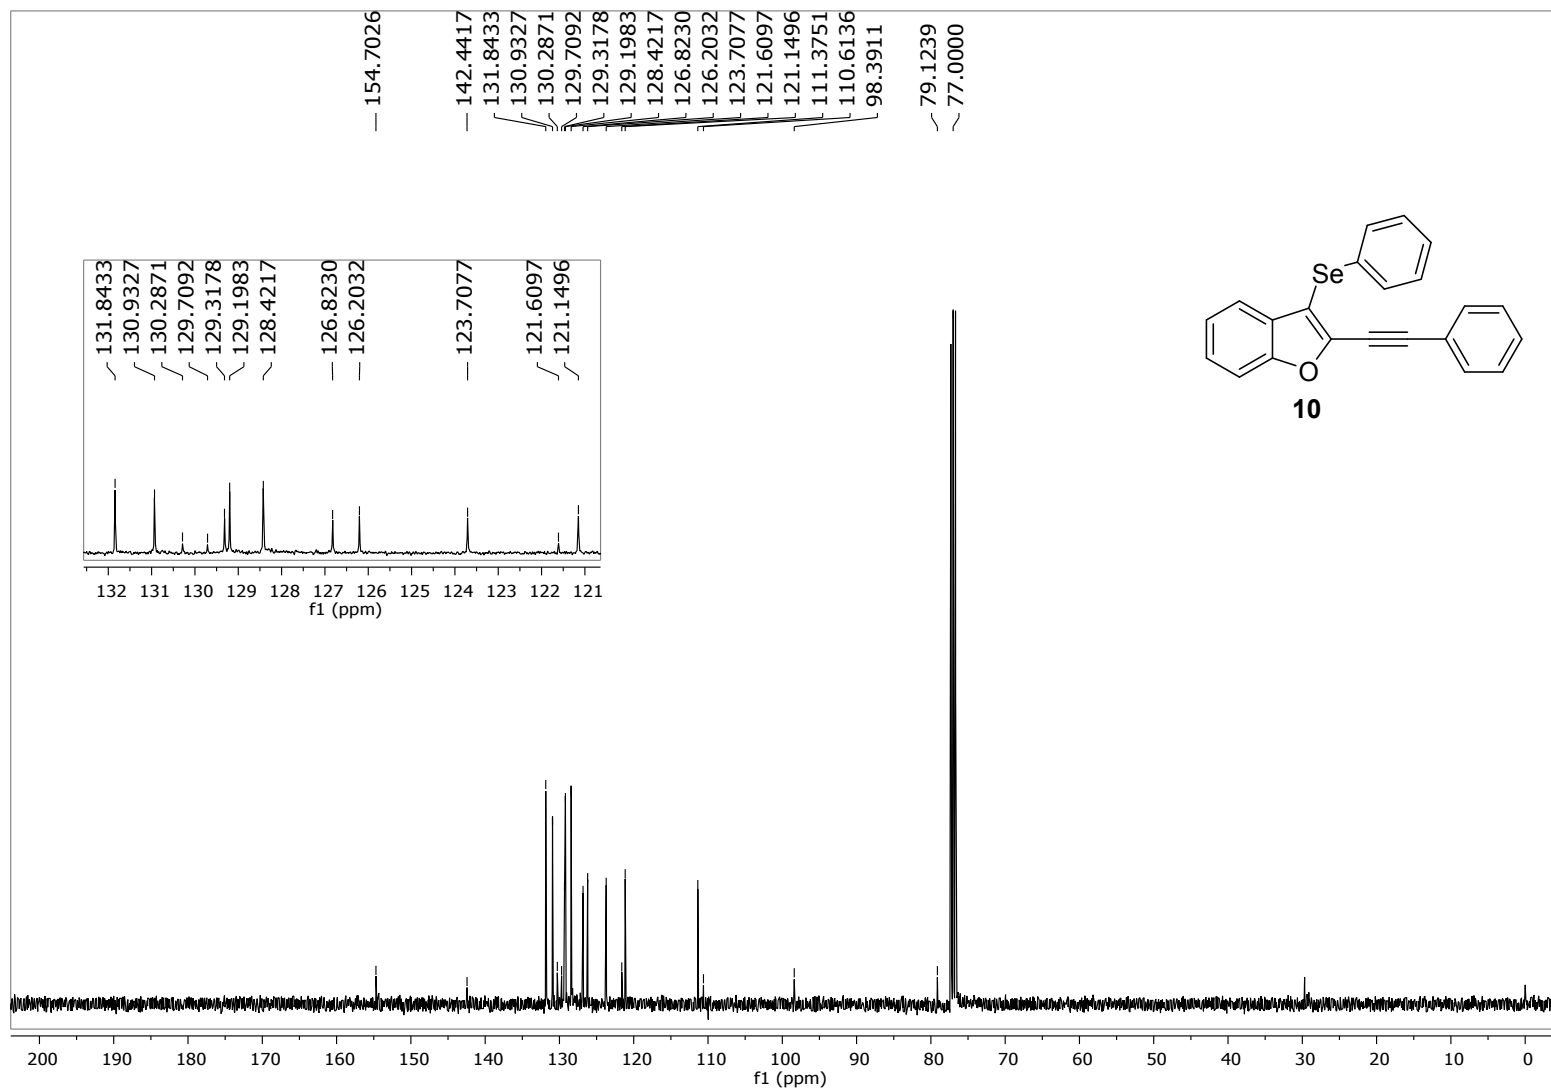

**Figure S46:** <sup>13</sup>C NMR (100 MHz, CDCl<sub>3</sub>) spectrum 2-(phenylethynyl)-3-(phenylselanyl)benzo[*b*]furan **10**.

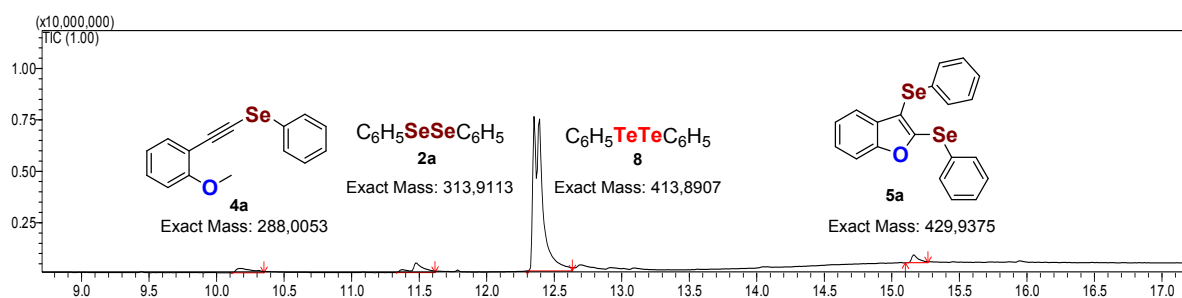

| Peak Report TIC |        |        |        |          |        |         |         |      |      |
|-----------------|--------|--------|--------|----------|--------|---------|---------|------|------|
| Peak#           | R.Time | I.Time | F.Time | Area     | Area%  | Height  | Height% | A/H  | Mark |
| 1               | 10.176 | 10.108 | 10.375 | 1844404  | 4.26   | 207375  | 2.42    | 8.89 | MI   |
| 2               | 11.477 | 11.317 | 11.608 | 2954521  | 6.83   | 476790  | 5.56    | 6.20 | MI   |
| 3               | 12.352 | 12.292 | 12.633 | 37045325 | 85.64  | 7516249 | 87.66   | 4.93 | MI   |
| 4               | 15.162 | 15.075 | 15.283 | 1413785  | 3.27   | 374062  | 4.36    | 3.78 | MI   |
|                 |        |        |        | 43258035 | 100.00 | 8574476 | 100.00  |      |      |

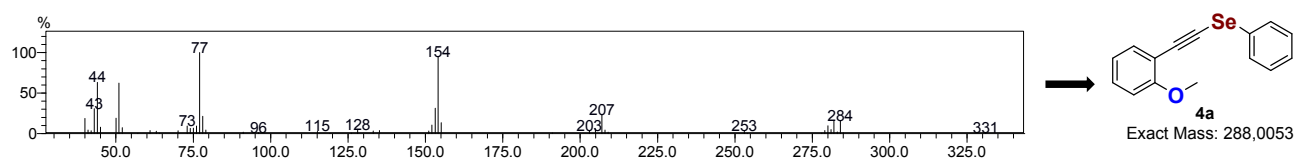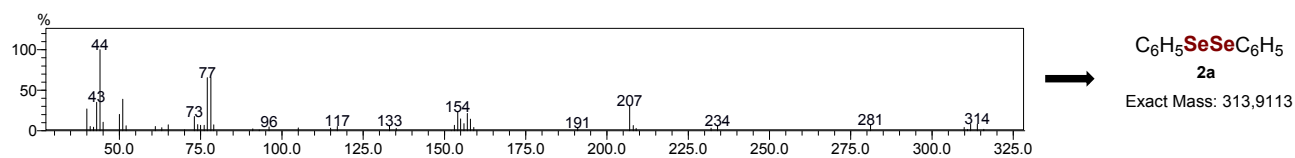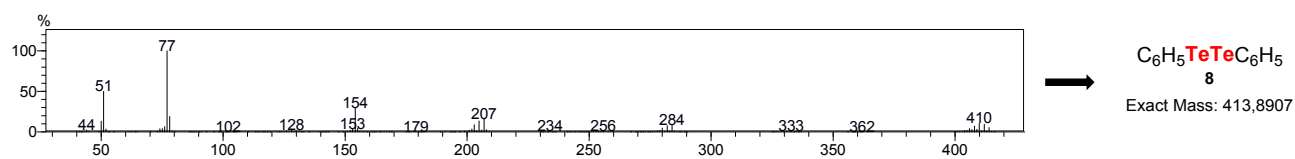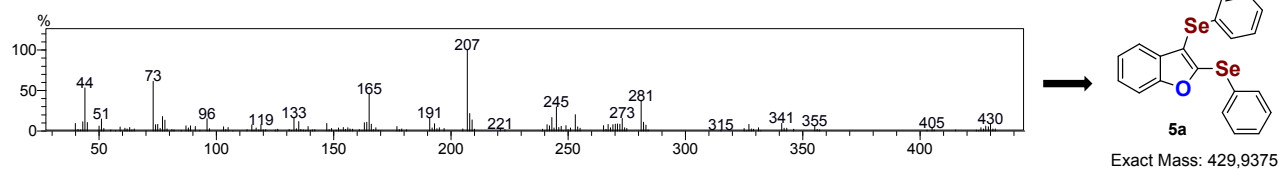

**Figure S47:** Cyclization reaction of selenoalkyne **4a** with diorganyl ditelluride **8** promoted by Oxone®.



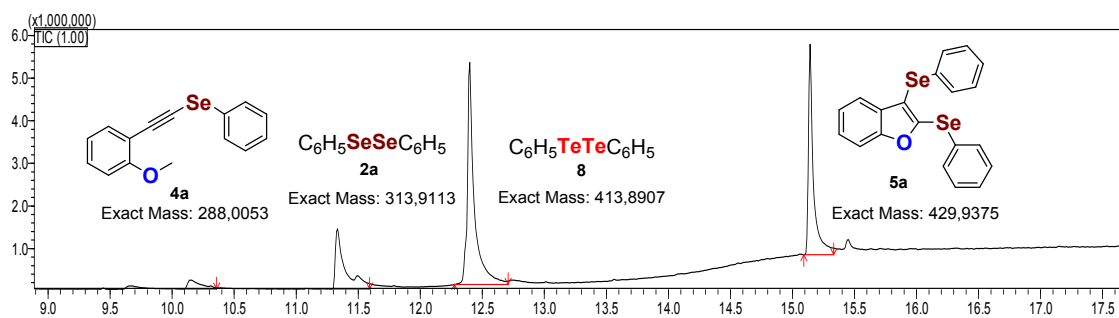

| Peak# | R.Time | I.Time | F.Time | Area     | Area%  | Height   | Height% | A/H  | Mark |
|-------|--------|--------|--------|----------|--------|----------|---------|------|------|
| 1     | 10.148 | 10.075 | 10.358 | 1645446  | 3.80   | 210098   | 1.78    | 7.83 | MI   |
| 2     | 11.332 | 11.283 | 11.592 | 7672895  | 17.71  | 1415356  | 12.02   | 5.42 | MI   |
| 3     | 12.398 | 12.275 | 12.708 | 20154878 | 46.51  | 5213155  | 44.27   | 3.87 | MI   |
| 4     | 15.142 | 15.092 | 15.333 | 13862081 | 31.99  | 4936043  | 41.92   | 2.81 | MI   |
|       |        |        |        | 43335300 | 100.00 | 11774652 | 100.00  |      |      |

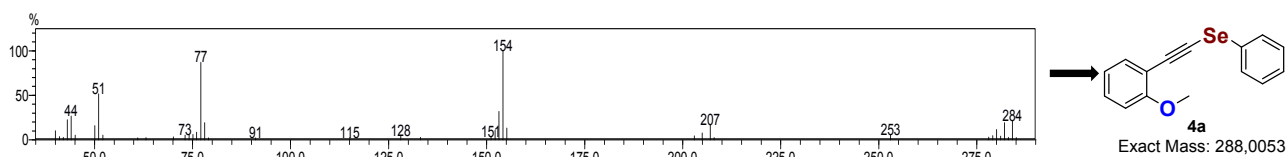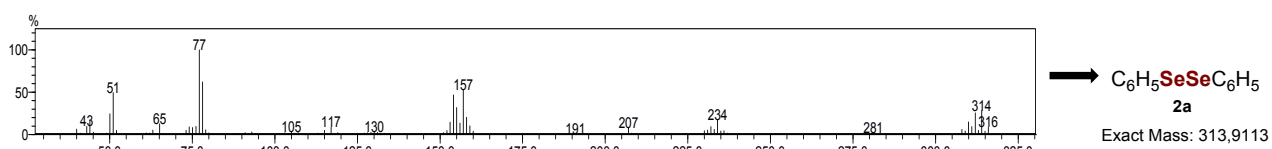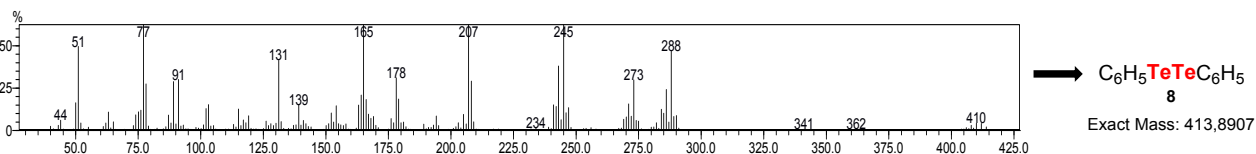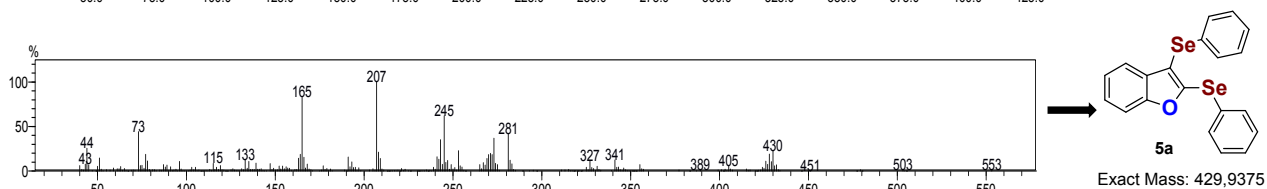

**Figure S48:** Cyclization reaction of teluroalkyne **4d** with diorganyl diselenide **2a** promoted by Oxone®.
